# Supplementary material for: Design, Synthesis and Biological Evaluation of Aromatase Inhibitors Based on Sulfonates and Sulfonamides of Resveratrol
Source: MDPI journal article supplement (doi:10.3390/ph14100984), 2021-09-27

## Design, Synthesis and Biological Evaluation of Aromatase Inhibitors based on Sulfonates and Sulfonamides of Resveratrol

Marialuigia Fantacuzzi<sup>a,§,\*</sup>, Marialucia Gallorini<sup>b,§</sup>, Nicola Gambacorta<sup>c</sup>, Alessandra Ammazalorso<sup>a</sup>, Zeineb Aturki<sup>d</sup>, Marwa Bahala<sup>b,e</sup>, Simone Carradori<sup>a</sup>, Letizia Giampietro<sup>a</sup>, Cristina Maccallini<sup>a</sup>, Amelia Cataldi<sup>b</sup>, Orazio Nicolotti<sup>c</sup>, Rosa Amoroso<sup>a</sup>, Barbara De Filippis<sup>a,\*</sup>

<sup>a</sup> Unit of Medicinal Chemistry, Department of Pharmacy, “G. d’Annunzio” University, Chieti, Italy

<sup>b</sup> Unit of Anatomy, Department of Pharmacy, “G. d’Annunzio” University, Chieti, Italy

<sup>c</sup> Unit of Medicinal Chemistry, Department of Department of Pharmacy, “A. Moro” University, Bari, Italy

<sup>d</sup> Institute for Biological Systems (ISB), Italian National Research Council, Monterotondo, Rome, Italy

<sup>e</sup> Department of Pharmaceutical Chemistry, Faculty of Pharmacy, Kafrelsheikh University, Kafr El Sheikh 33516, Egypt

\*Correspondence: B.D.F., barbara.defilippis@unich.it; M.F., marialuigia.fantacuzzi@unich.it.

§These authors contributed equally to the work

### Supplemental Table of Contents

Spectra of compound:

|                   |                                                                        |    |
|-------------------|------------------------------------------------------------------------|----|
| <b>Figure S1</b>  | 4-[(E)-2-phenylvinyl]phenylbenzenesulfonate <b>1a</b>                  | 4  |
| <b>Figure S2</b>  | 4-[(E)-2-phenylvinyl]phenyl 3-nitrobenzenesulfonate <b>1b</b>          | 6  |
| <b>Figure S3</b>  | 4-[(E)-2-phenylvinyl]phenyl 4-methyl-2-nitrobenzenesulfonate <b>1c</b> | 8  |
| <b>Figure S4</b>  | 4-[(E)-2-phenylvinyl]phenyl 4-methylbenzenesulfonate <b>1d</b>         | 10 |
| <b>Figure S5</b>  | 4-[(E)-2-phenylvinyl]phenyl 4-cyanobenzenesulfonate <b>1e</b>          | 12 |
| <b>Figure S6</b>  | 4-[(E)-2-phenylvinyl]phenyl 4-(acetilamino)benzenesulfonate <b>1f</b>  | 14 |
| <b>Figure S7</b>  | 4-[(E)-2-phenylvinyl]phenyl 2,4-dimethoxybenzenesulfonate <b>1g</b>    | 16 |
| <b>Figure S8</b>  | 4-[(E)-2-phenylvinyl]phenylmethanesulfonate <b>1h</b>                  | 18 |
| <b>Figure S9</b>  | 4-[(E)-2-phenylvinyl]phenyl ethanesulfonate <b>1i</b>                  | 20 |
| <b>Figure S10</b> | 4-[(E)-2-phenylvinyl]phenyl phenylmethanesulfonate <b>1j</b>           | 22 |
| <b>Figure S11</b> | 4-[(E)-2-phenylvinyl]phenyl 5-chlorothiophene-2-sulfonate <b>1k</b>    | 24 |

|                    |                                                                                                |    |
|--------------------|------------------------------------------------------------------------------------------------|----|
| <b>Figure S12</b>  | <i>N</i> -{4-[( <i>E</i> )-2-phenylvinyl]phenyl}benzenesulfonamide <b>2a</b>                   | 26 |
| <b>Figure S13</b>  | 3-nitro- <i>N</i> -{4-[( <i>E</i> )-2-phenylvinyl]phenyl}benzenesulfonamide <b>2b</b>          | 28 |
| <b>Figure S14</b>  | 4-methyl-3-nitro- <i>N</i> -{4-[( <i>E</i> )-2-phenylvinyl]phenyl}benzenesulfonamide <b>2c</b> | 30 |
| <b>Figure S15</b>  | 4-methyl- <i>N</i> -{4-[( <i>E</i> )-2-phenylvinyl]phenyl}benzenesulfonamide <b>2d</b>         | 32 |
| <b>Figure S16</b>  | 4-cyano- <i>N</i> -{4-[( <i>E</i> )-2-phenylvinyl]phenyl}benzenesulfonamide <b>2e</b>          | 34 |
| <b>Figure S17</b>  | <i>N</i> -{4-[(4-[( <i>E</i> )-2-phenylvinyl]phenyl)amino)sulfonyl]phenyl}acetamide <b>2f</b>  | 36 |
| <b>Figure S18</b>  | 2,4-dimethoxy- <i>N</i> -{4-[( <i>E</i> )-2-phenylvinyl]phenyl}benzenesulfonamide <b>2g</b>    | 38 |
| <b>Figure S19</b>  | <i>N</i> -{4-[( <i>E</i> )-2-phenylvinyl]phenyl}methanesulfonamide <b>2h</b>                   | 40 |
| <b>Figure S20</b>  | <i>N</i> -{4-[( <i>E</i> )-2-phenylvinyl]phenyl}ethanesulfonamide <b>2i</b>                    | 42 |
| <b>Figure S21</b>  | 1-phenyl- <i>N</i> -{4-[( <i>E</i> )-2-phenylvinyl]phenyl}methanesulfonamide <b>2j</b>         | 44 |
| <b>Figure S22</b>  | 5-chloro- <i>N</i> -{4-[( <i>E</i> )-2-phenylvinyl]phenyl}thiophene-2-sulfonamide <b>2k</b>    | 46 |
| <b>Table S1.</b>   |                                                                                                | 48 |
| <b>Figure S23:</b> | Chromatograms of the active compounds <b>1b-c</b> and <b>1j</b> in neutral conditions          | 49 |

**Figure S1:**  $^1\text{H}$  and  $^{13}\text{C}$  NMR spectrum (300 MHz,  $\text{CDCl}_3$ ) of 4-[(*E*)-2-phenylvinyl]phenylbenzenesulfonate **1a**

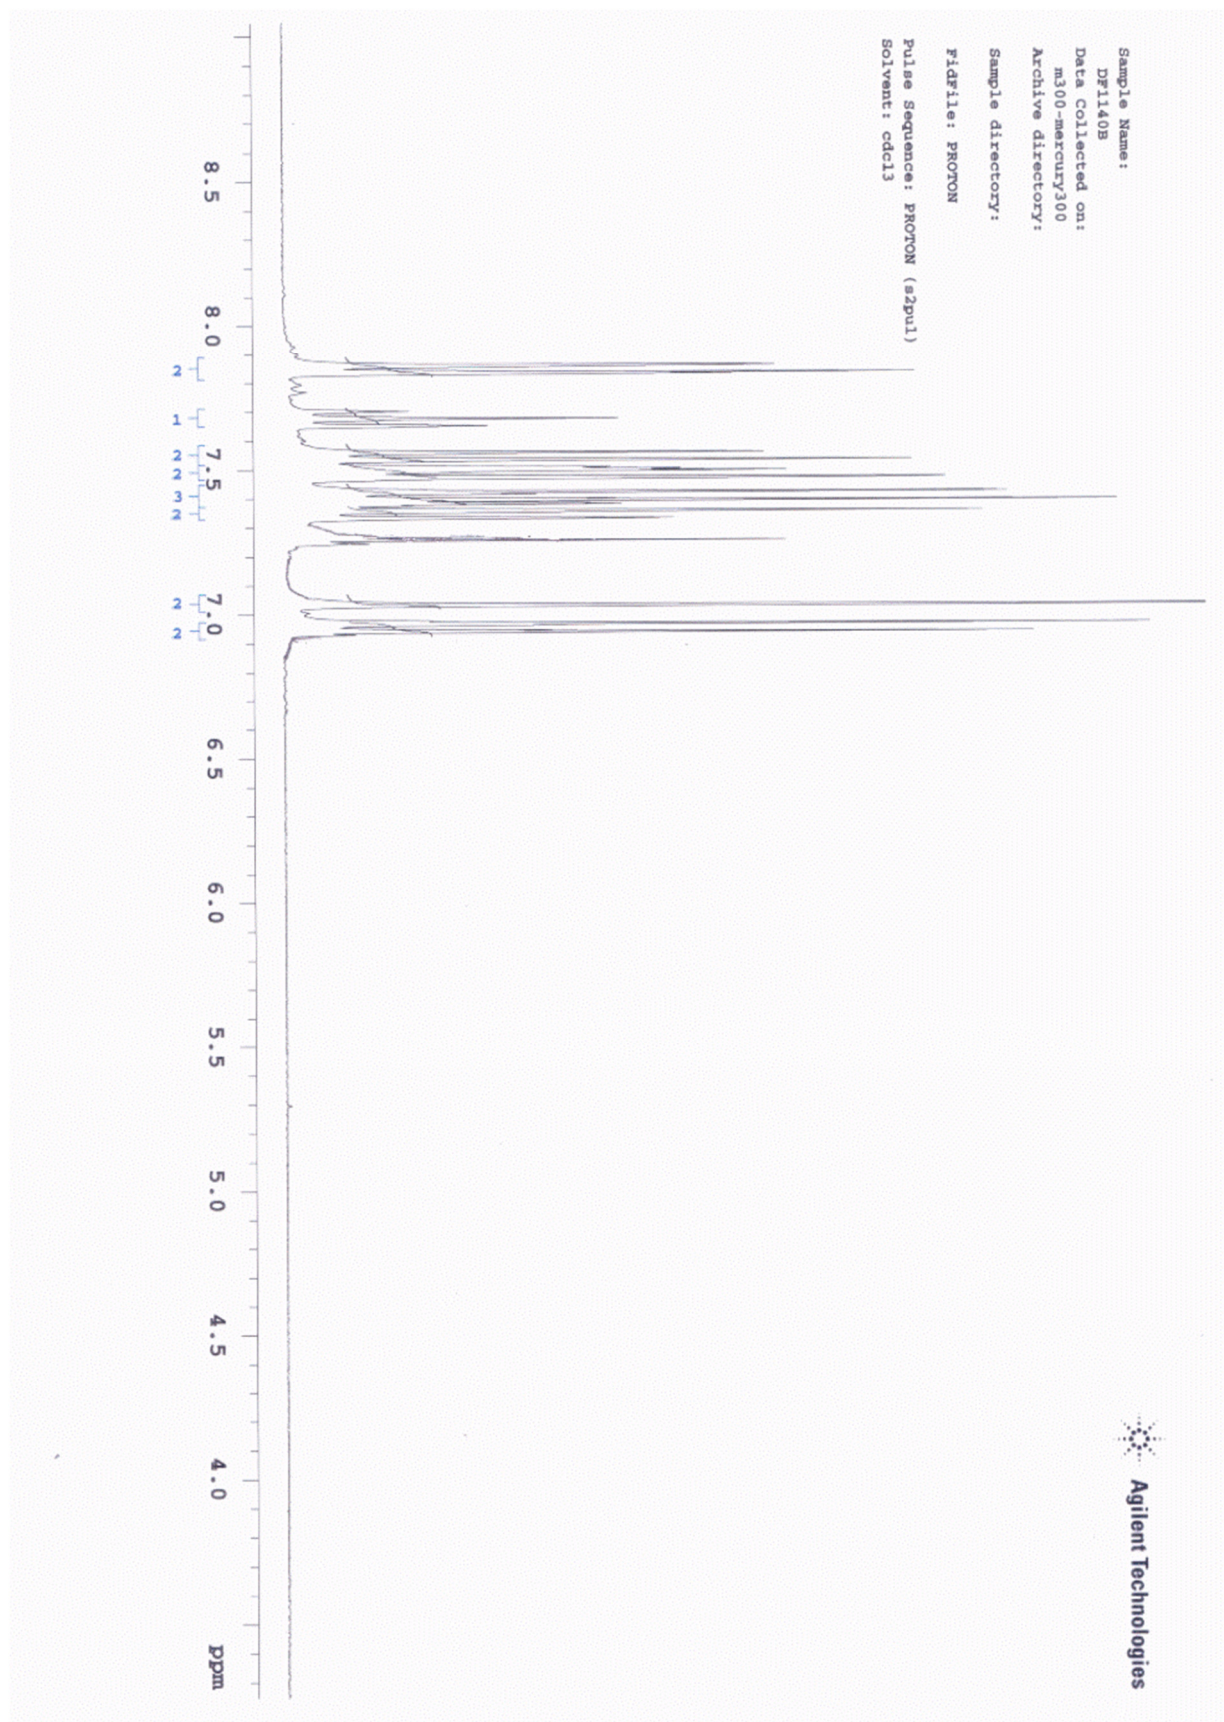

Sample Name:

DF1140B

Data Collected on:

m300-mercury300

Archive directory:

Sample directory:

F1:File: CARBON

Pulse Sequence: CARBON (szpul)

Solvent: cdc13

Data collected on: Mar 11 2021

Operator: defil

Relax. delay 1.000 sec

Pulse 45.0 degrees

Acq. time 0.868 sec

Width 18867.9 Hz

1826 repetitions

OBSERVE C13, 75.4847602 MHz

DECOUPLE H1, 300.1991980 MHz

Power 38 dB

continuously on

WALTZ-16 modulated

DATA PROCESSING

Line broadening 0.5 Hz

FT size 32768

Total time 1 hr, 4 min

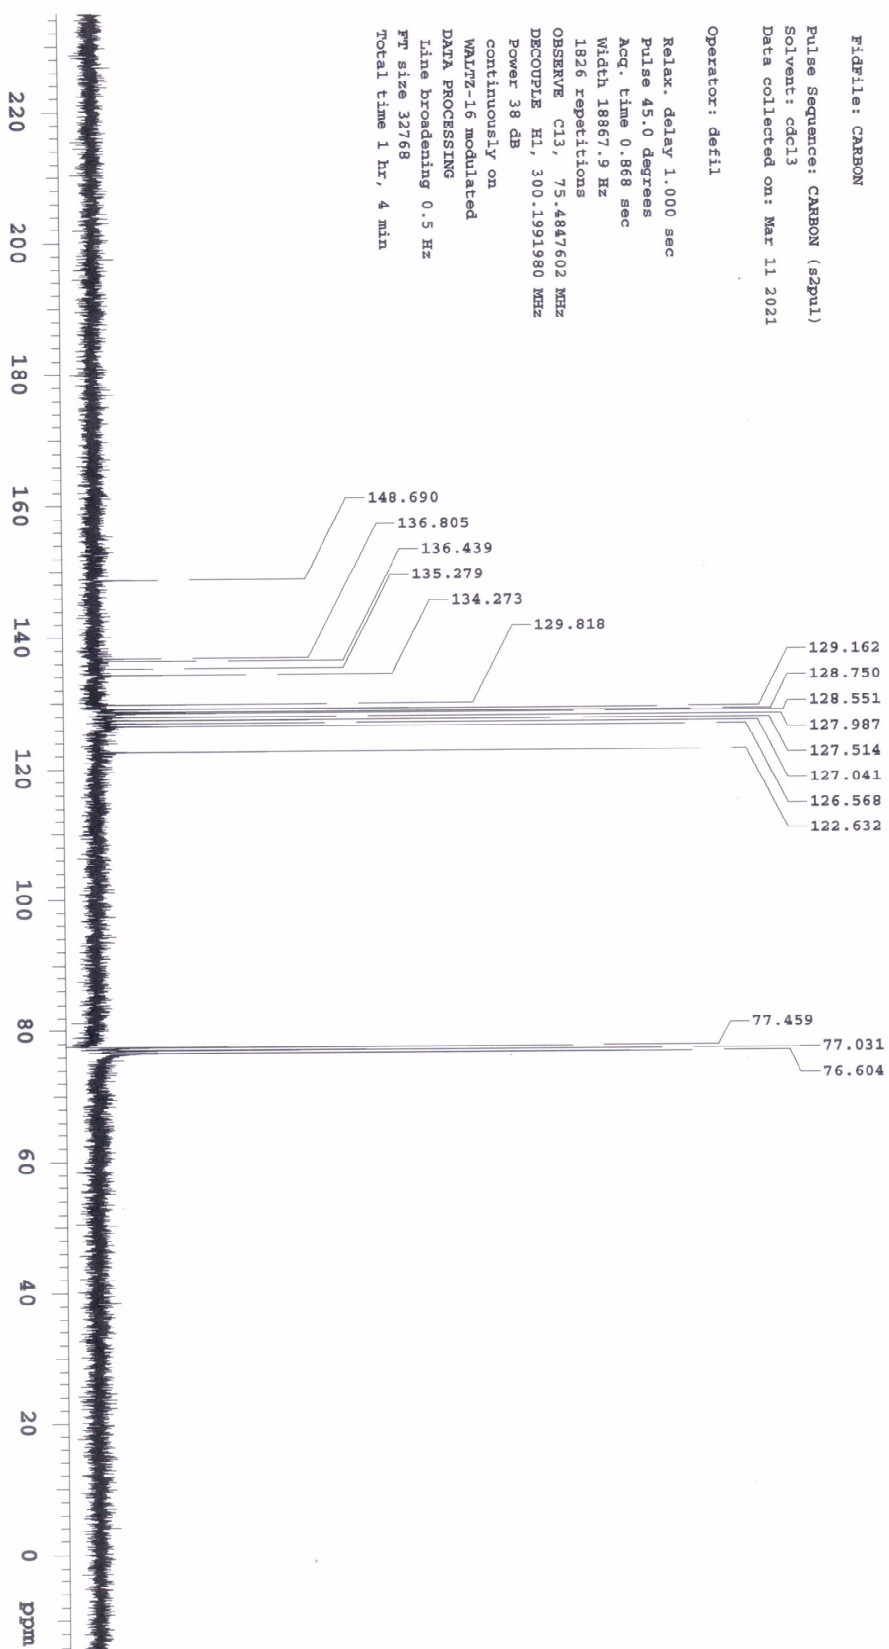



**Figure S2:**  $^1\text{H}$  and  $^{13}\text{C}$  NMR spectrum (300 MHz,  $\text{CDCl}_3$ ) of 4-[(E)-2-phenylvinyl]phenyl 3-nitrobenzenesulfonate **1b**

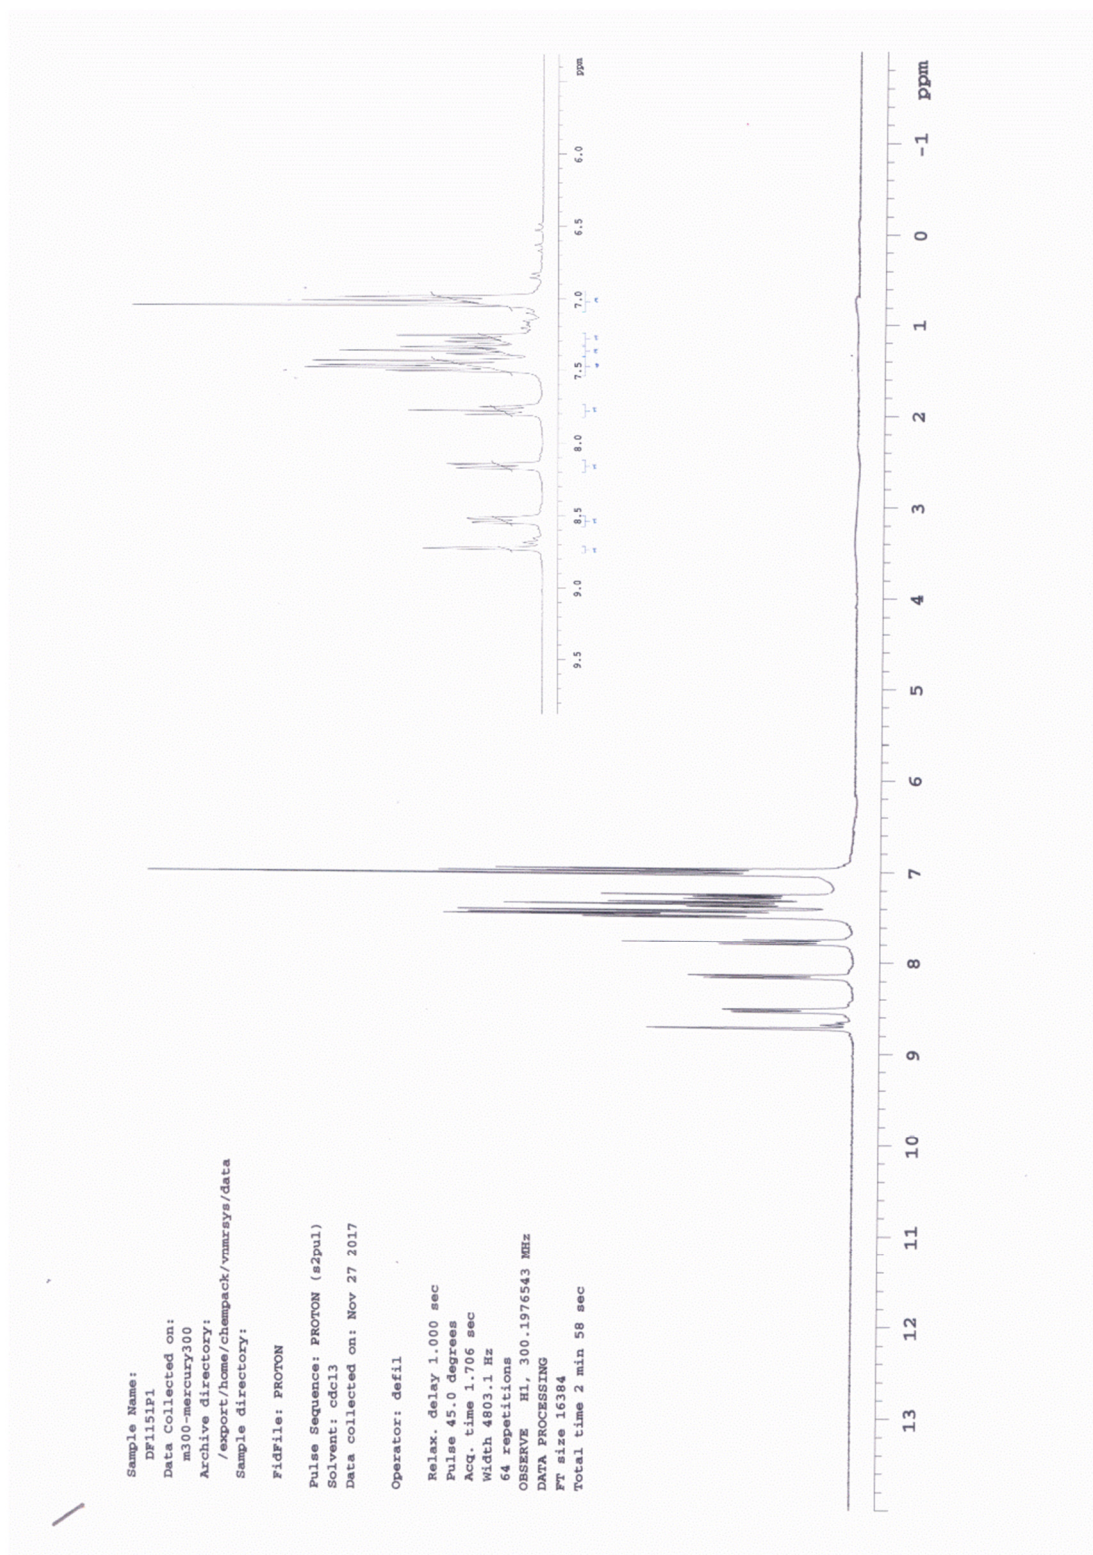



Sample Name:  
 DF151P2  
 Data Collected on:  
 m300-mercury300  
 Archive directory:  
 /export/home/chempack/vnmrSYS/data  
 Sample directory:  
 FIDFile: CARBON  
 Pulse Sequence: CARBON (s2pul)  
 Solvent: cdcl3  
 Data collected on: Nov 27 2017  
 Operator: defil  
 Relax. delay 1.000 sec  
 Pulse 45.0 degrees  
 Acq. time 0.868 sec  
 Width 18867.9 Hz  
 800 repetitions  
 OBSERVE C13, 75.4847602 MHz  
 DECOUPLE H1, 300.1991980 MHz  
 Power 38 dB  
 continuously on  
 WALTZ-16 modulated  
 DATA PROCESSING  
 Line broadening 0.5 Hz  
 FT size 32768  
 Total time 25 min

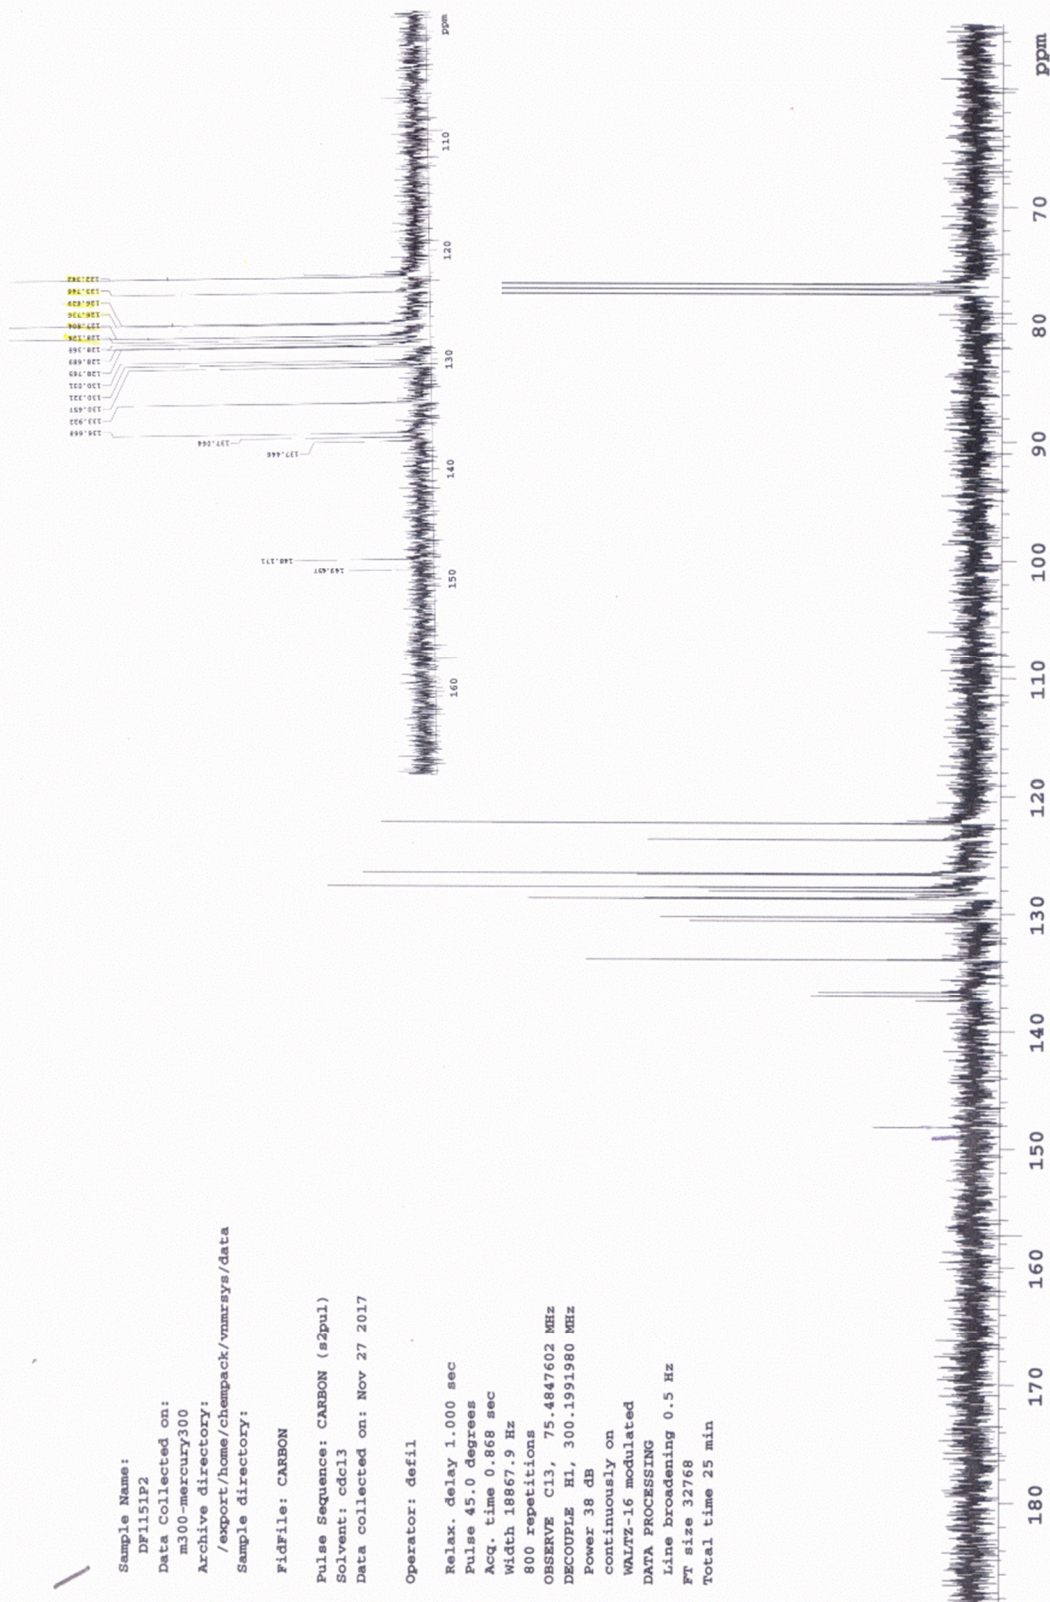

**Figure S3:**  $^1\text{H}$  NMR (300 MHz,  $\text{CDCl}_3$ ) and  $^{13}\text{C}$  spectrum (300 MHz,  $\text{CDCl}_3$ ) of 4-[(*E*)-2-phenylvinyl]phenyl 4-methyl-2-nitrobenzenesulfonate **1c**

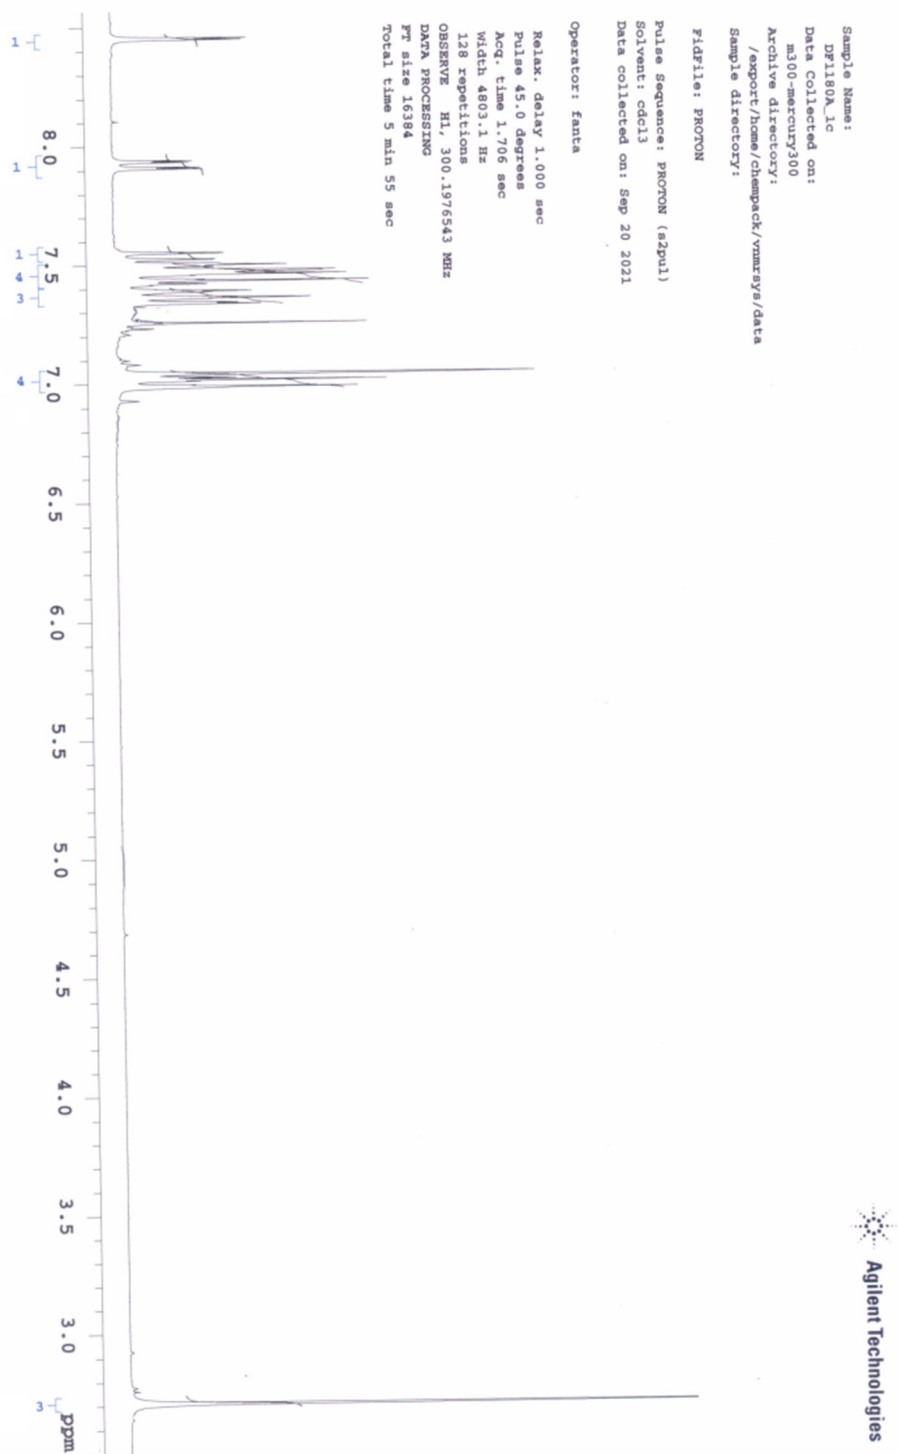

Sample Name:  
DF1180A  
Data Collected on:  
m300-mercury300  
Archive directory:

Sample directory:  
Fidfile: CARBON

Pulse Sequence: CARBON-13  
Solvent: cdcl3  
Data collected on: Mar 18 2021

Operator: defil

Relax. delay 7.000 sec  
Pulse 45.0 degrees  
Acq. time 0.868 sec  
Width 18867.9 Hz  
2000 repetitions  
OBSERVE C13, 75.4847604 MHz  
DECUPLE H1, 300.1991980 MHz  
Power 38 dB  
conting on  
WALTZ-16 Modulated  
DATA PROCESSING  
Line broadening 0.5 Hz  
FT size 32768  
Total time 1 hr, 4 min

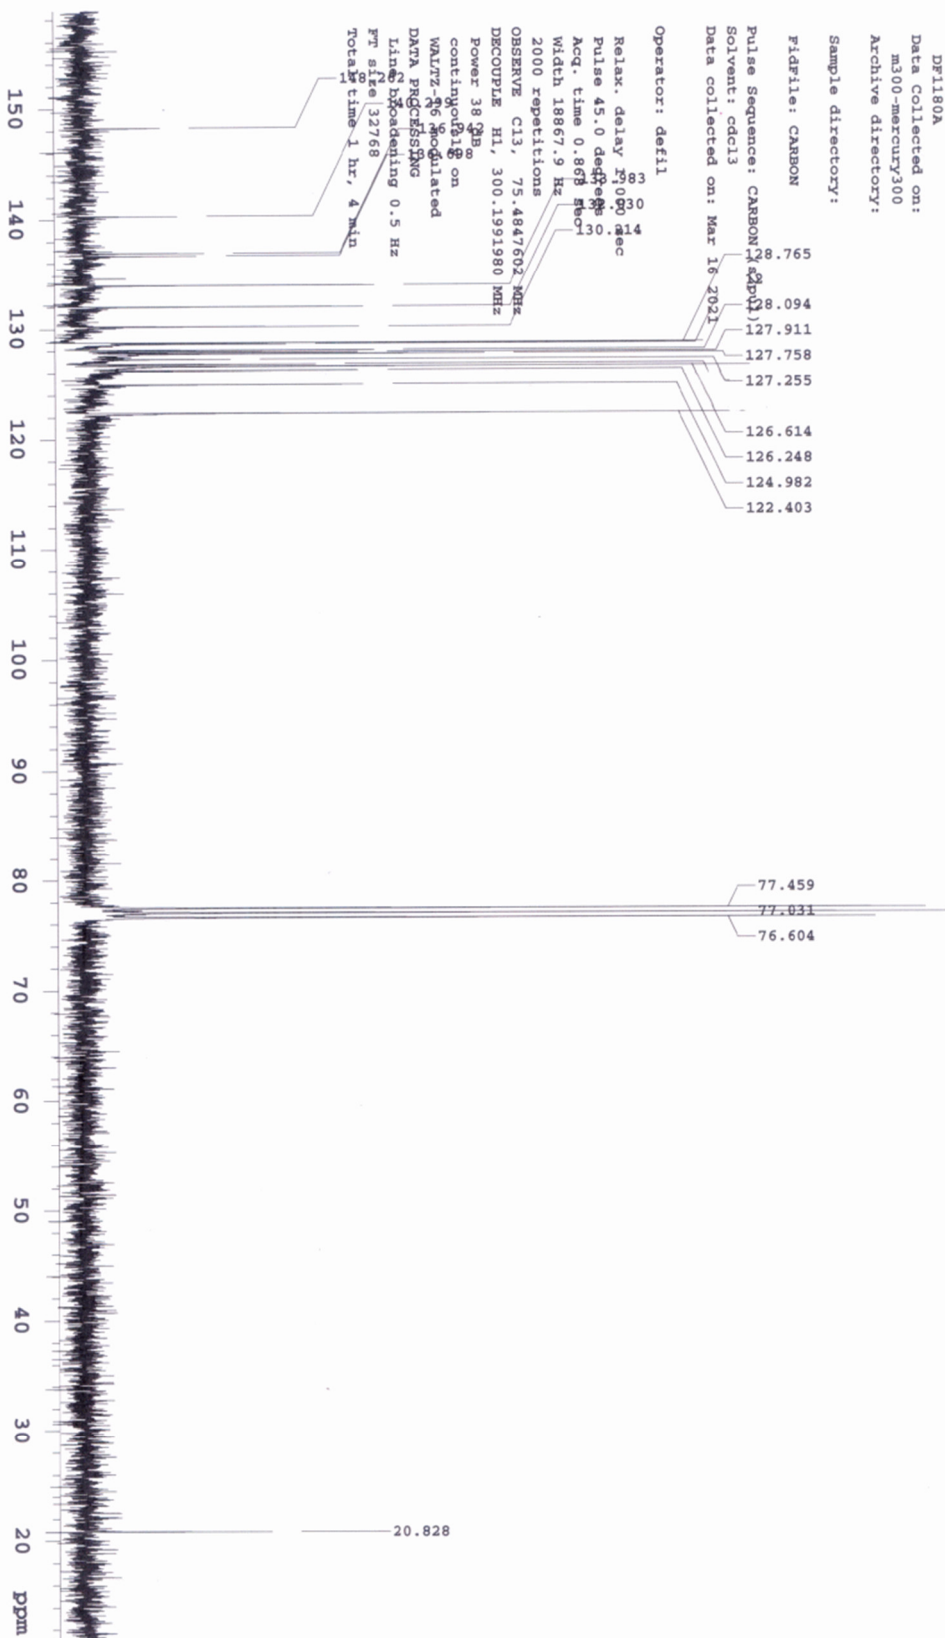



**Figure S4:**  $^1\text{H}$  NMR and  $^{13}\text{C}$  spectrum (300 MHz,  $\text{CDCl}_3$ ) of 4-[(*E*)-2-phenylvinyl]phenyl 4-methylbenzenesulfonate **1d**

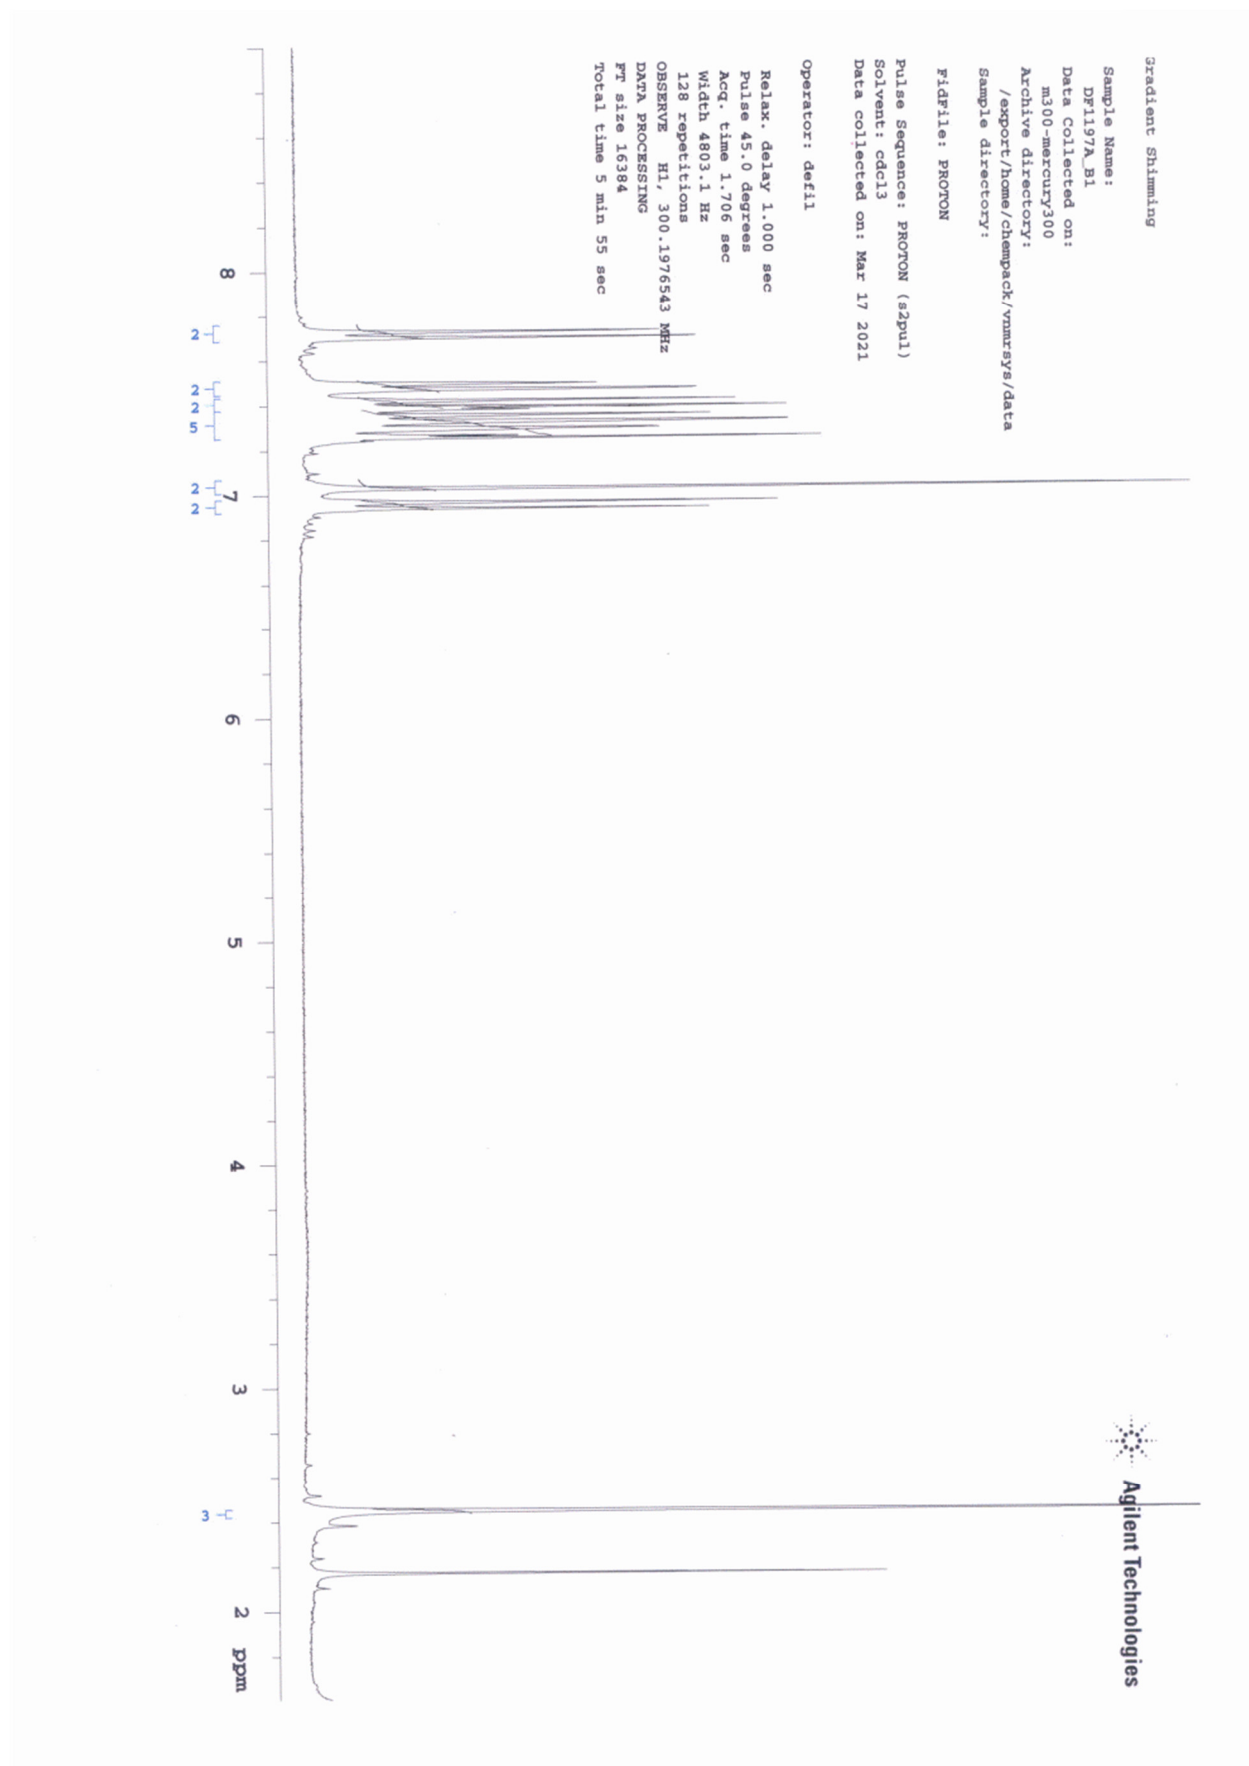

Gradient Shimming

Sample Name:

DF1197A\_B1

Data Collected on:

m300-mercury300

Archive directory:

/export/home/chempack/vnmrSYS/data

Sample directory:

File: CARBON

Pulse Sequence: CARBON (s2pul)

Solvent: cdcl3

Data collected on: Mar 17 2021

Operator: defil

Relax. delay 1.000 sec

Pulse 45.0 degrees

Acq. time 0.868 sec

Width 18867.9 Hz

2000 repetitions

OBSERVE C13, 75.4847602 MHz

DECOUPLE H1, 300.1991980 MHz

Power 38 dB

continuously on

WALTZ-16 modulated

DATA PROCESSING

Line broadening 0.5 Hz

FT size 32768

Total time 1 hr, 4 min

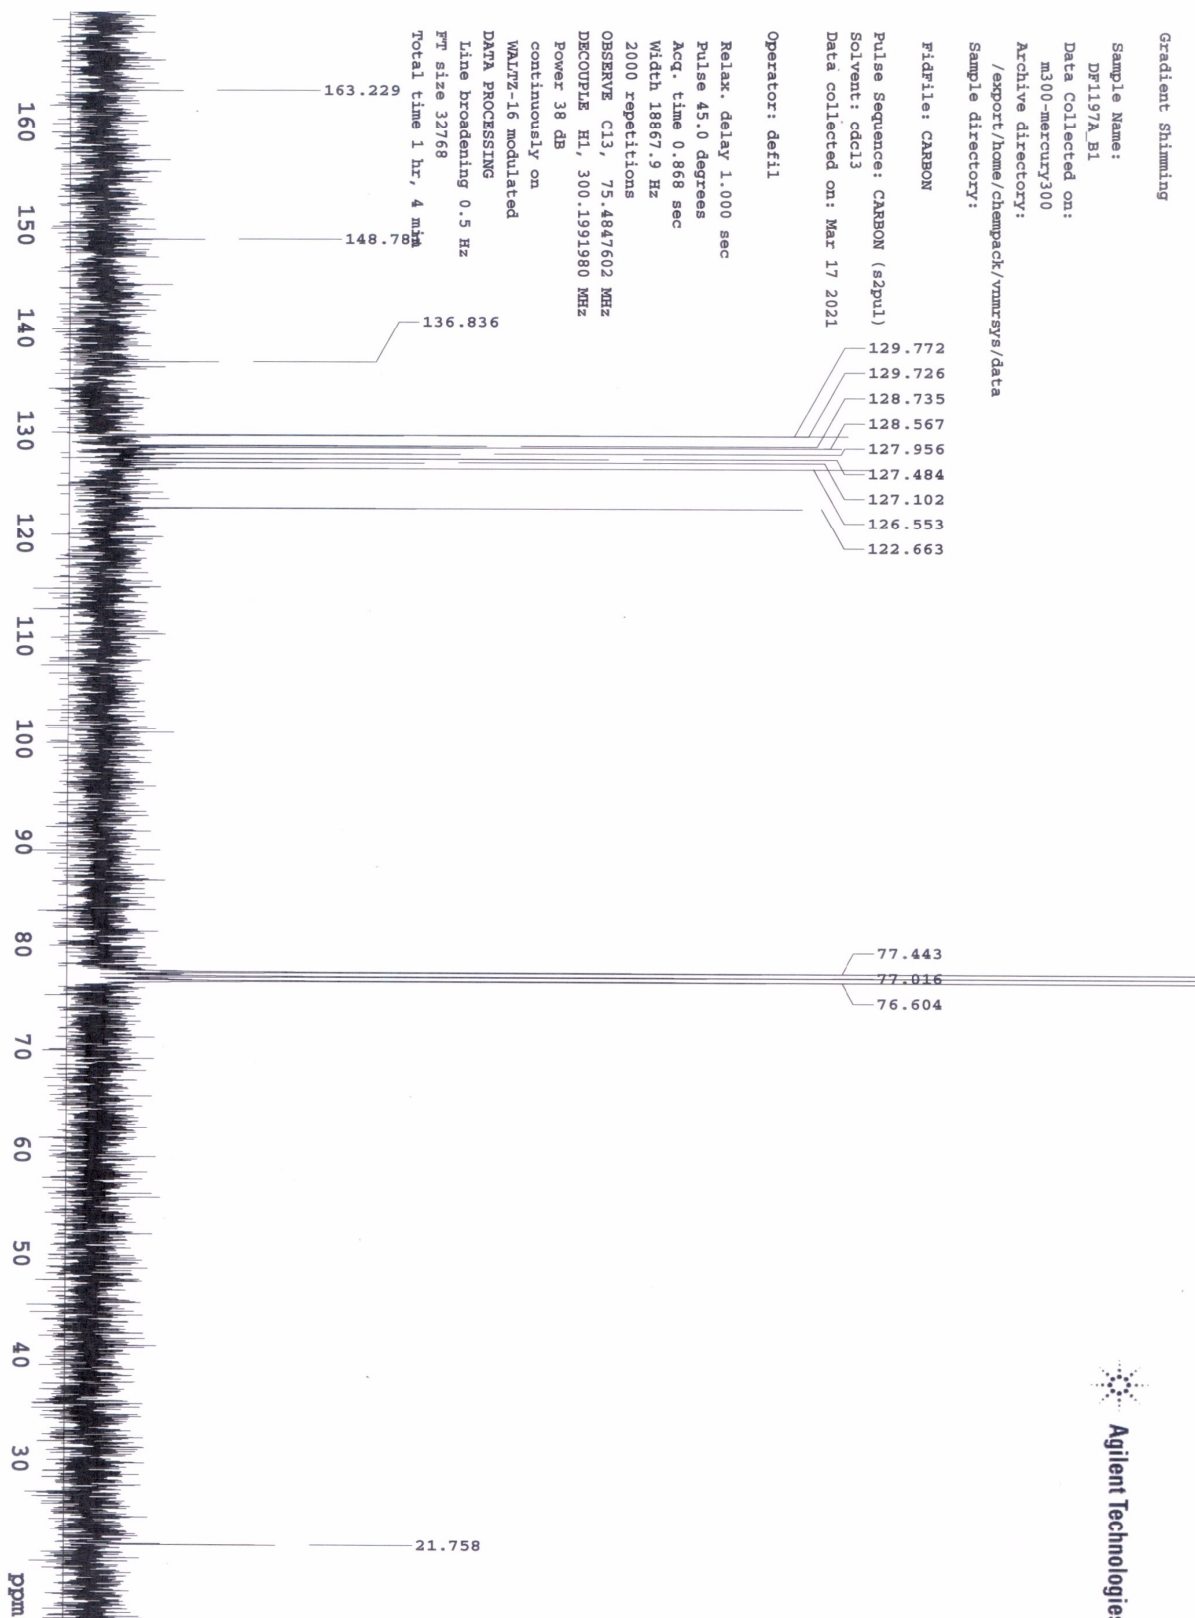



Agilent Technologies

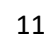

# Gradient Shimming

Sample Name:

DF1184A

Data Collected on:

m300-mercury300

Archive directory:

/export/home/chempack/vnmrsys/data

Sample directory:

Fidfile: CARBON

Pulse Sequence: CARBON (s2pul)

Solvent: cdcl3

Data collected on: Mar 17 2021

Operator: defil

Relax. delay 1.000 sec

Pulse 45.0 degrees

Acq. time 0.868 sec

Width 1867.9 Hz

2500 repetitions

OBSERVE c13, 75.4847602 MHz

DECOUPLE H1, 300.1991980 MHz

Power 38 dB

continuously on

WALTZ-16 modulated

DATA PROCESSING

Line broadening 0.5 Hz

FT size 32768

Total time 1 hr, 20 min

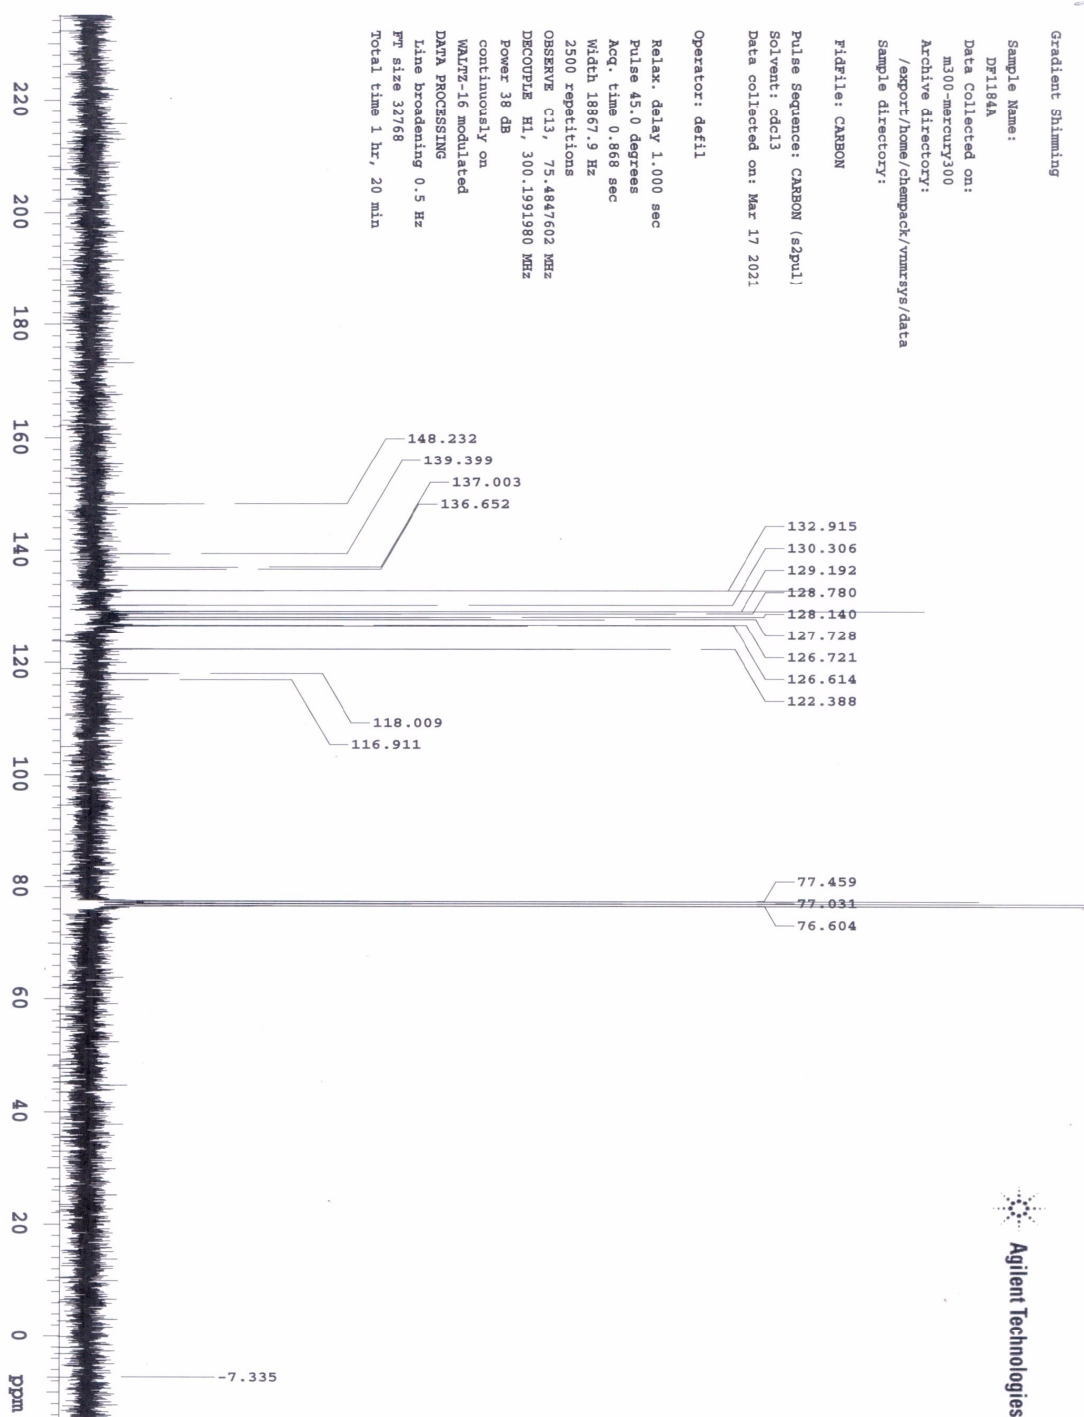





# Gradient Shimming

Sample Name:

Data Collected on:

m300-mercury300

Archive directory:

/export/home/chempack/vnmrSYS/data

Sample directory:

File: CARBON

Pulse Sequence: CARBON (s2pul)

Solvent:

Data collected on: Jul 11 2018

Operator: defil

Relax. delay 1.000 sec

Pulse 45.0 degrees

Acq. time 0.868 sec

Width 18867.9 Hz

1200 repetitions

OBSERVE C13, 75.4847602 MHz

DECOUPLE H1, 300.1991980 MHz

Power 38 dB

continuously on

WALTZ-16 modulated

DATA PROCESSING

Line broadening 0.5 Hz

FT size 32768

Total time 38 min

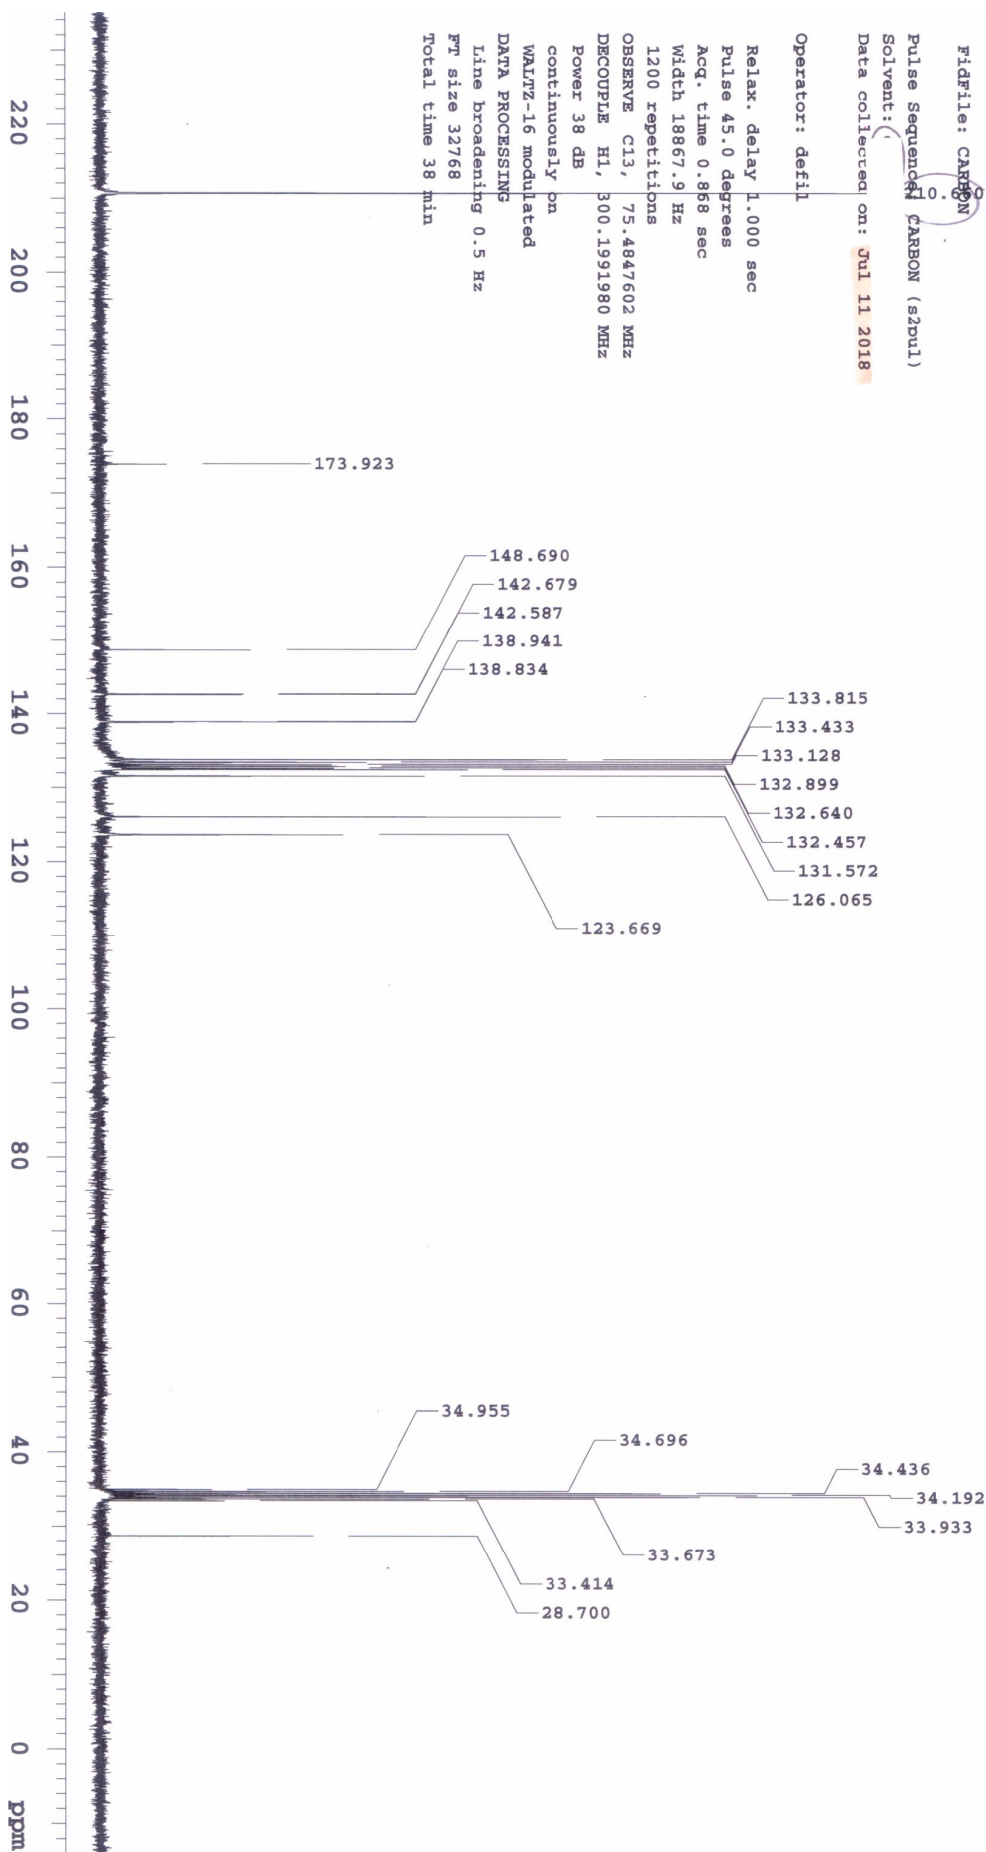

**Figure S7:**  $^1\text{H}$  NMR and  $^{13}\text{C}$  spectrum (300 MHz,  $\text{CDCl}_3$ ) of 4-[(*E*)-2-phenylvinyl]phenyl 2,4-dimethoxybenzenesulfonate **1g**

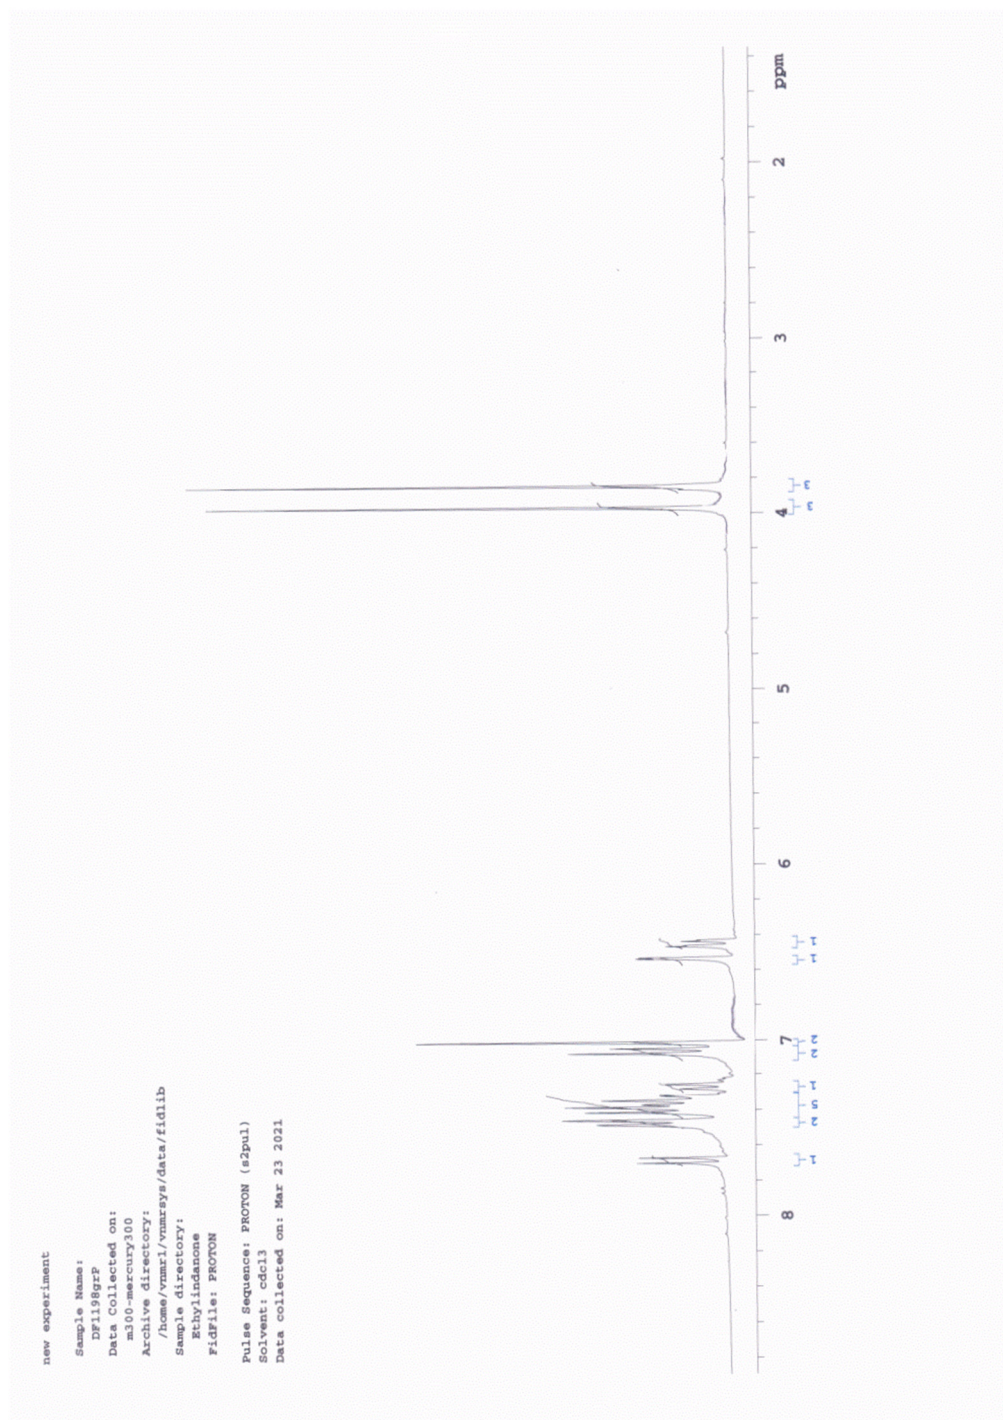

Gradient Shimming

Sample Name:

DP119gerez0

Data Collected on:

m300-mercury300

Archive directory:

/export/home/chempack/vnmr/sys/data

Sample directory:

FidFile: CARBON

Pulse Sequence: CARBON (s2pul1)

Solvent: cdcl3

Data collected on: May 3 2018

Operator: defil

Relax. delay 1.000 sec

Pulse 45.0 degrees

Acq. time 0.868 sec

Width 18867.9 Hz

797 repetitions

OBSERVE C13, 75.4847602 MHz

DECOUPLE H1, 300.1991980 MHz

Power 38 dB

continuously on

WALTZ-16 modulated

DATA PROCESSING

Line broadening 0.5 Hz

FT size 32768

Total time 25 min

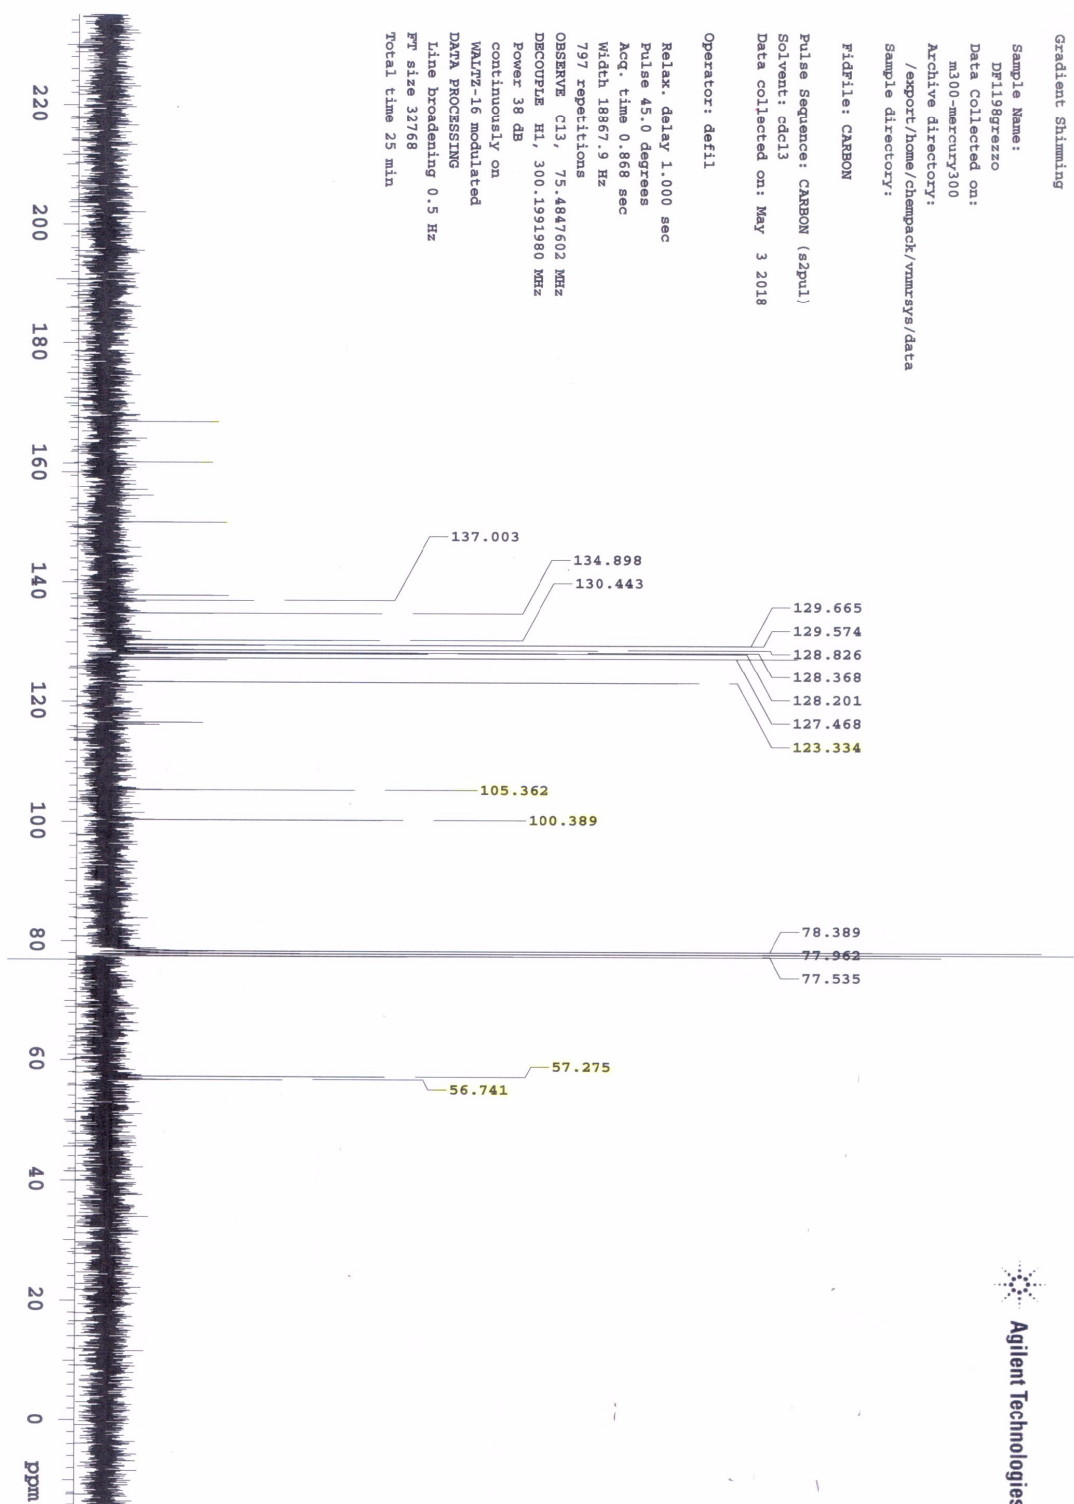



**Figure S8:**  $^1\text{H}$  NMR and  $^{13}\text{C}$  spectrum (300 MHz,  $\text{CDCl}_3$ ) of 4-[(*E*)-2-phenylvinyl]phenylmethanesulfonate **1h**

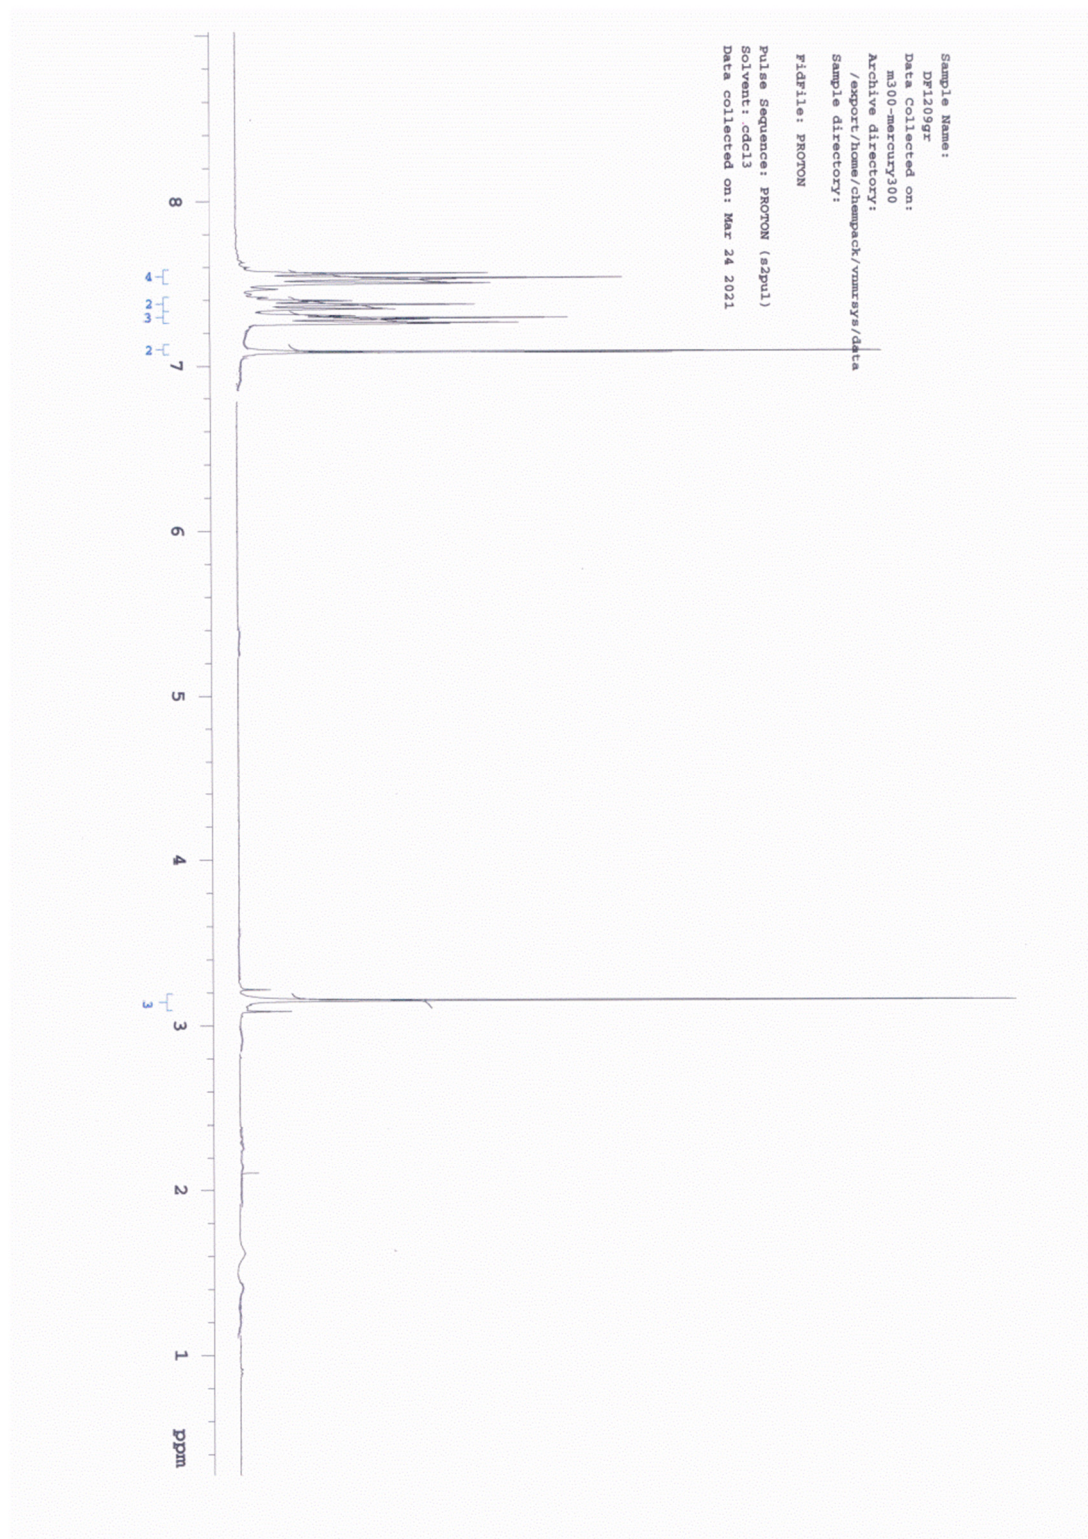

Sample Name:  
DF1209gr  
Data Collected on:  
m300-mercury300  
Archive directory:  
/export/home/chempack/vnmrsws/data  
Sample directory:

F1df1e: CARBON

Pulse Sequence: CARBON (s2pul)  
Solvent: cdcl3  
Data collected on: Mar 24 2021

Operator: fanta

Relax. delay 1.000 sec  
Pulse 45.0 degrees  
Acq. time 0.868 sec  
Width 18867.9 Hz  
2000 repetitions  
OBSERVE C13, 75.4847602 MHz  
DECOUPLE H1, 300.1991980 MHz  
Power 38 dB  
continuously on  
WALTZ-16 modulated  
DATA PROCESSING  
line broadening 0.5 Hz  
FT size 32768  
Total time 1 hr, 4 min

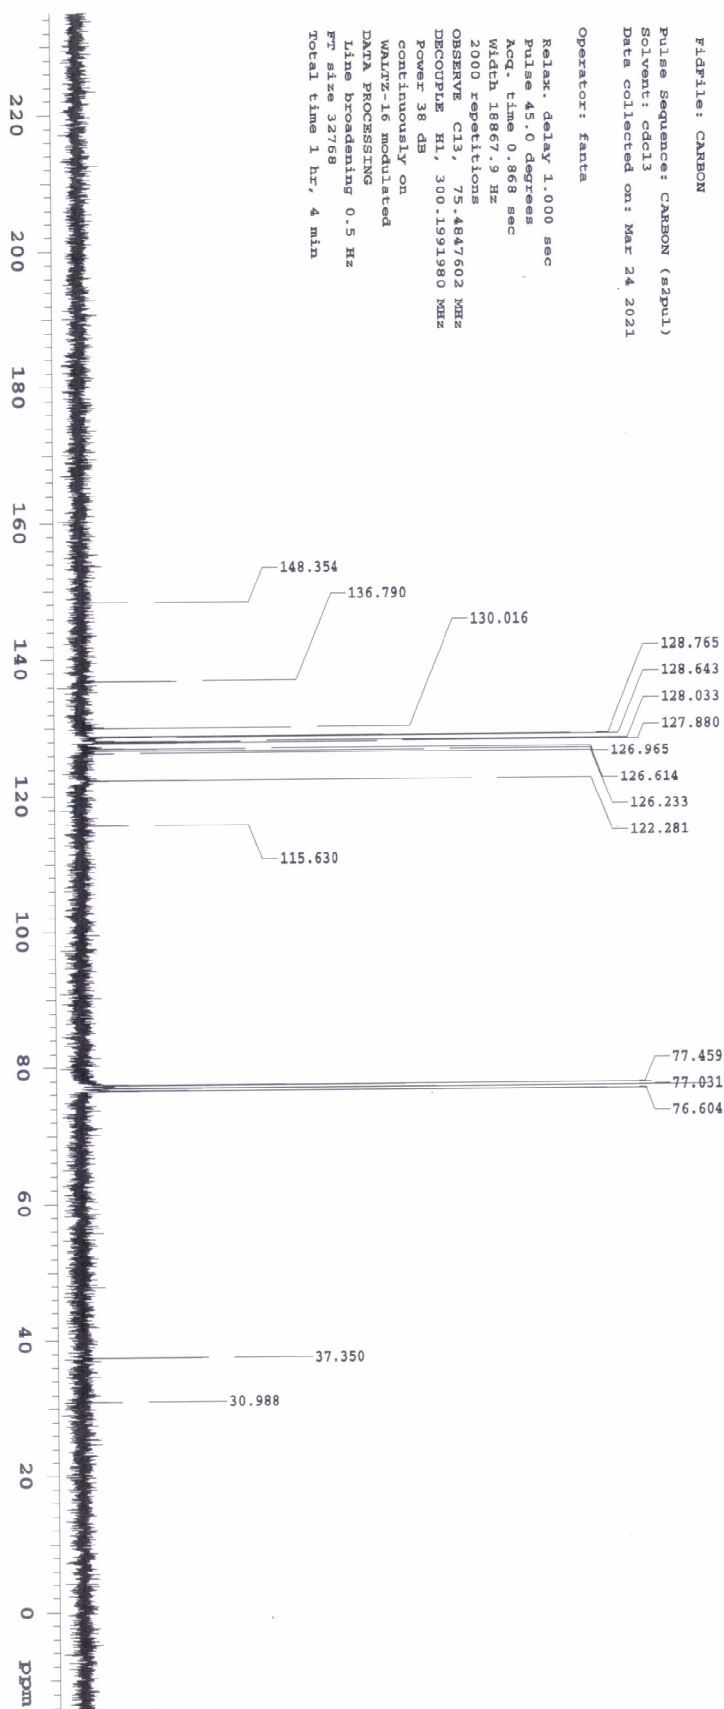



**Figure S9:**  $^1\text{H}$  NMR and  $^{13}\text{C}$  spectrum (300 MHz,  $\text{CDCl}_3$ ) of 4-[(*E*)-2-phenylvinyl]phenyl ethanesulfonate **1i**

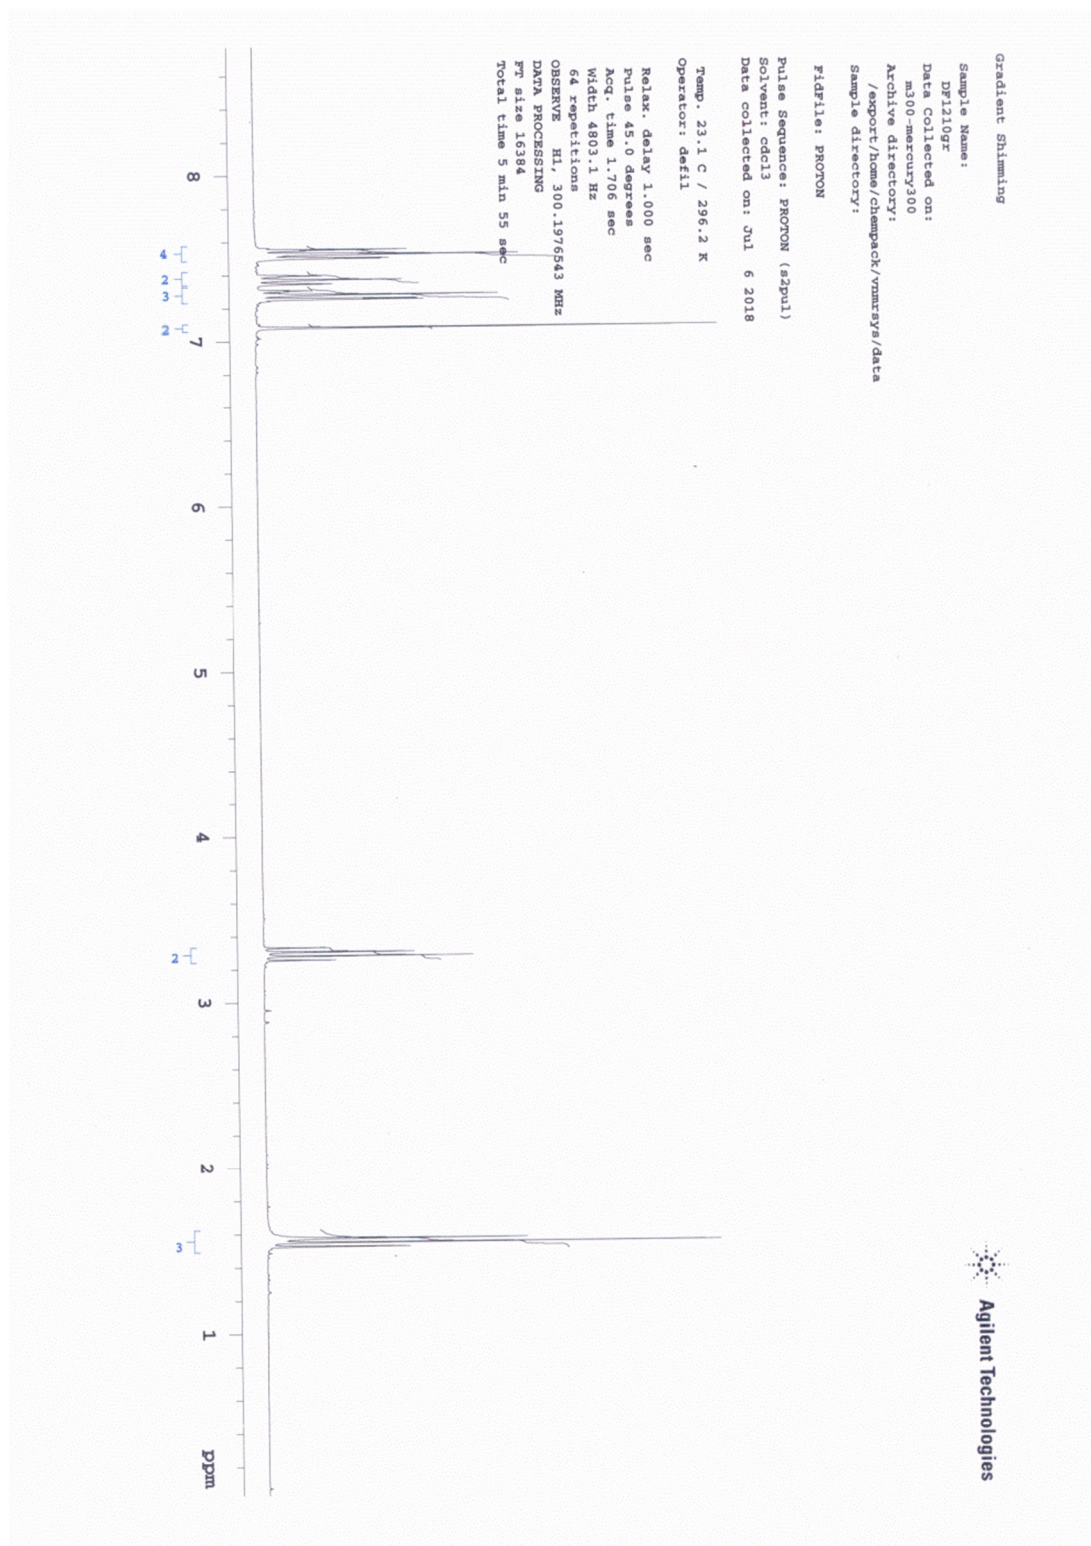

Gradient Shimming

Sample Name:  
DF1210gr  
Data Collected on:  
m300-mercury300  
Archive directory:  
/export/home/chempack/vnmr/sys/data  
Sample directory:

Fidfile: CARBON

Pulse Sequence: CARBON (s2pul)  
Solvent: cdcl3  
Data collected on: Jul 6 2018

Operator: deffil

Relax. delay 1.000 sec  
Pulse 45.0 degrees  
Acq. time 0.868 sec  
Width 18867.9 Hz  
800 repetitions  
OBSERVE C13, 75.4847602 MHz  
DECOUPLE H1, 300.1591980 MHz  
Power 38 dB  
continuously ON  
WALTZ-16 modulated  
DATA PROCESSING  
Line broadening 0.5 Hz  
FT size 32768  
Total time 25 min

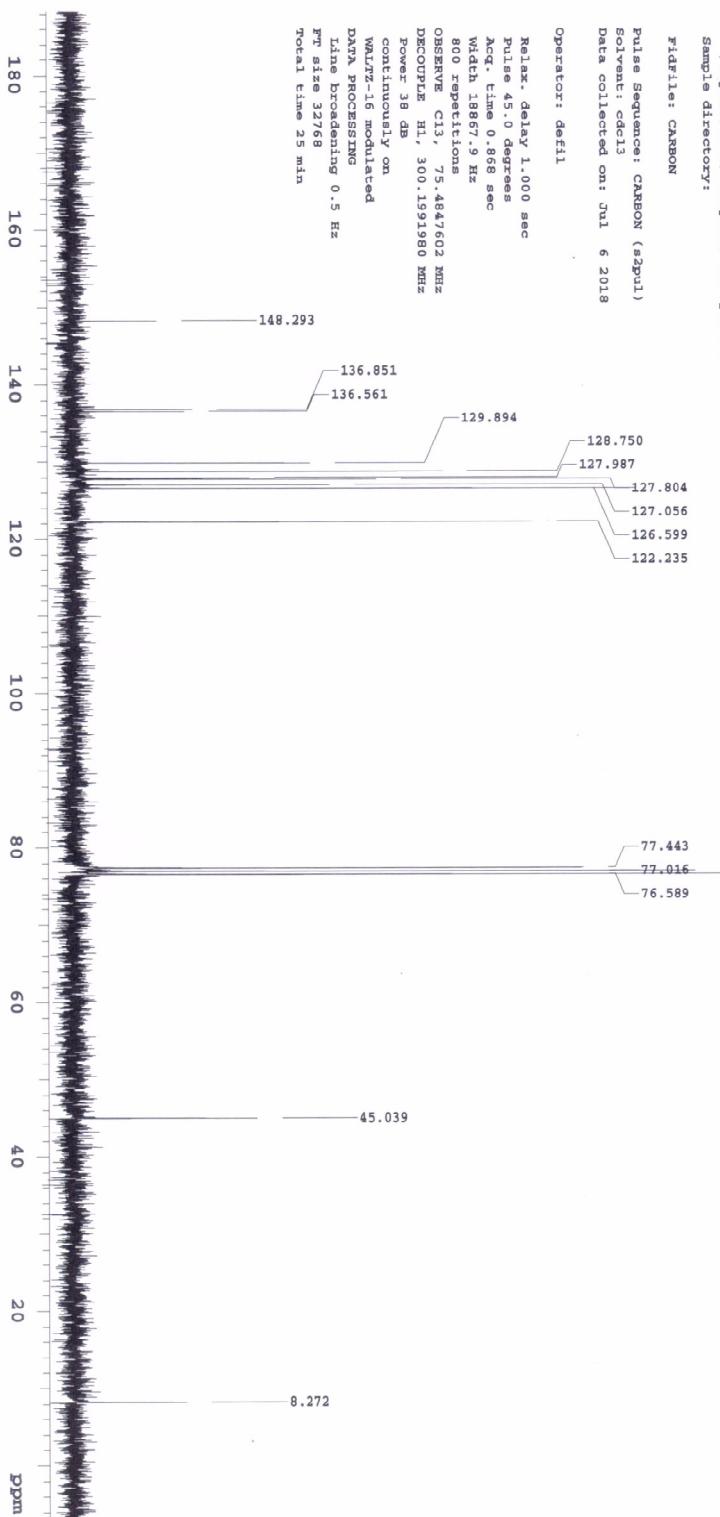



**Figure S10:**  $^1\text{H}$ NMR and  $^{13}\text{C}$  spectrum (300 MHz,  $\text{CDCl}_3$ ) of 4-[(*E*)-2-phenylvinyl]phenyl phenylmethanesulfonate **1j**

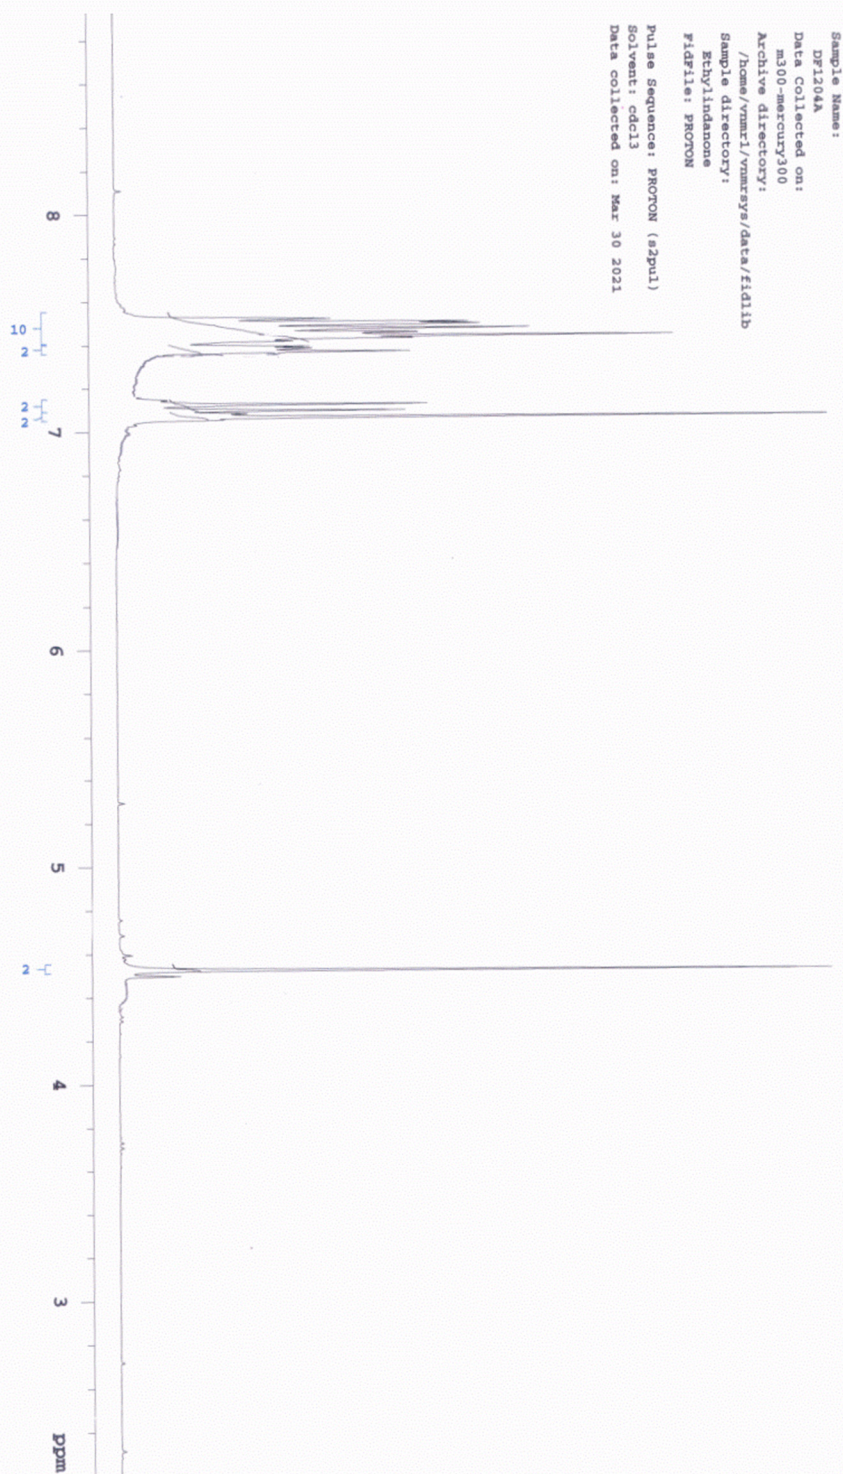

new experiment

Sample Name:

DF1204A

Data Collected on:

m300-mercury300

Archive directory:

/home/vnmr1/vnmr3ys/data/df1204a

Sample directory:

ethylindanone

File: CARBON

Pulse Sequence: CARBON (s2pul)

Solvent: cdcl3

Data collected on: Mar 30 2021

Operator: defil

Relax. delay 1.000 sec

Pulse 45.0 degrees

Acq. time 0.868 sec

Width 18867.9 Hz

1344 repetitions

OBSERVE C13, 75.4847602 MHz

DECOUPLE H1, 300.1991980 MHz

Power 38 dB

continuously on

WALTZ-16 modulated

DATA PROCESSING

line broadening 0.5 Hz

FT size 32768

Total time 1 hr, 4 min

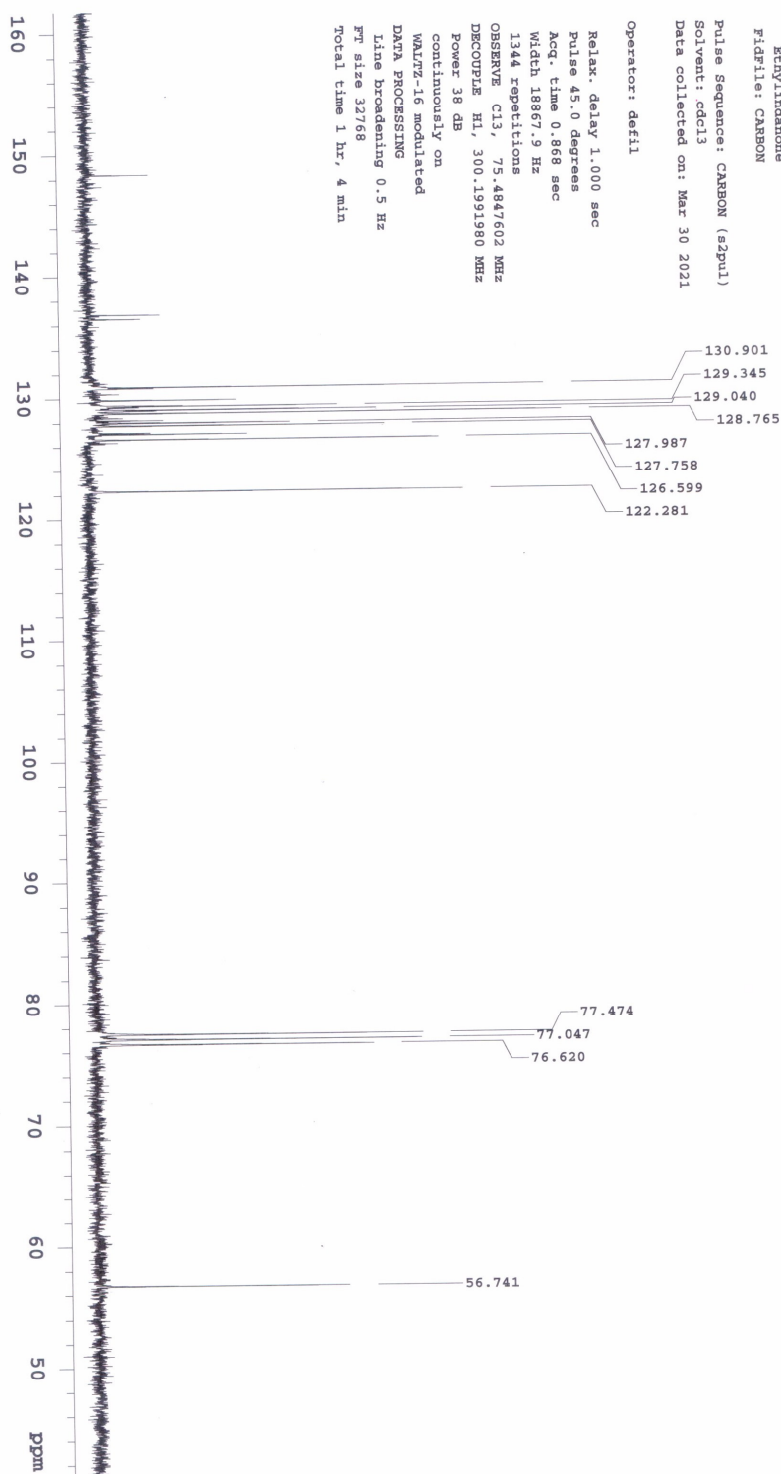





Gradient Spinning

Sample Name:

Df16A\_AK-I

Data Collected on:

M300-mercury300

Archive directory:

/export/home/chempack/vmrays/data

Sample directory:

Fidfile: CARBON

Pulse Sequence: CARBON (zgpg1)

Solvent: cdcl3

Data collected on: Mar 5 2018

Operator: de11

Relax. delay 1.000 sec

Pulse 45.0 degrees

Acq. time 0.868 sec

Width 18667.9 Hz

800 repetitions

OBSERVE C13, 75.4647602 MHz

DECOUPLE H1, 300.1991980 MHz

Power 38 dB

continuously on

WALTZ-16 modulated

DATA PROCESSING

Line broadening 0.5 Hz

FT size 32768

Total time 25 min

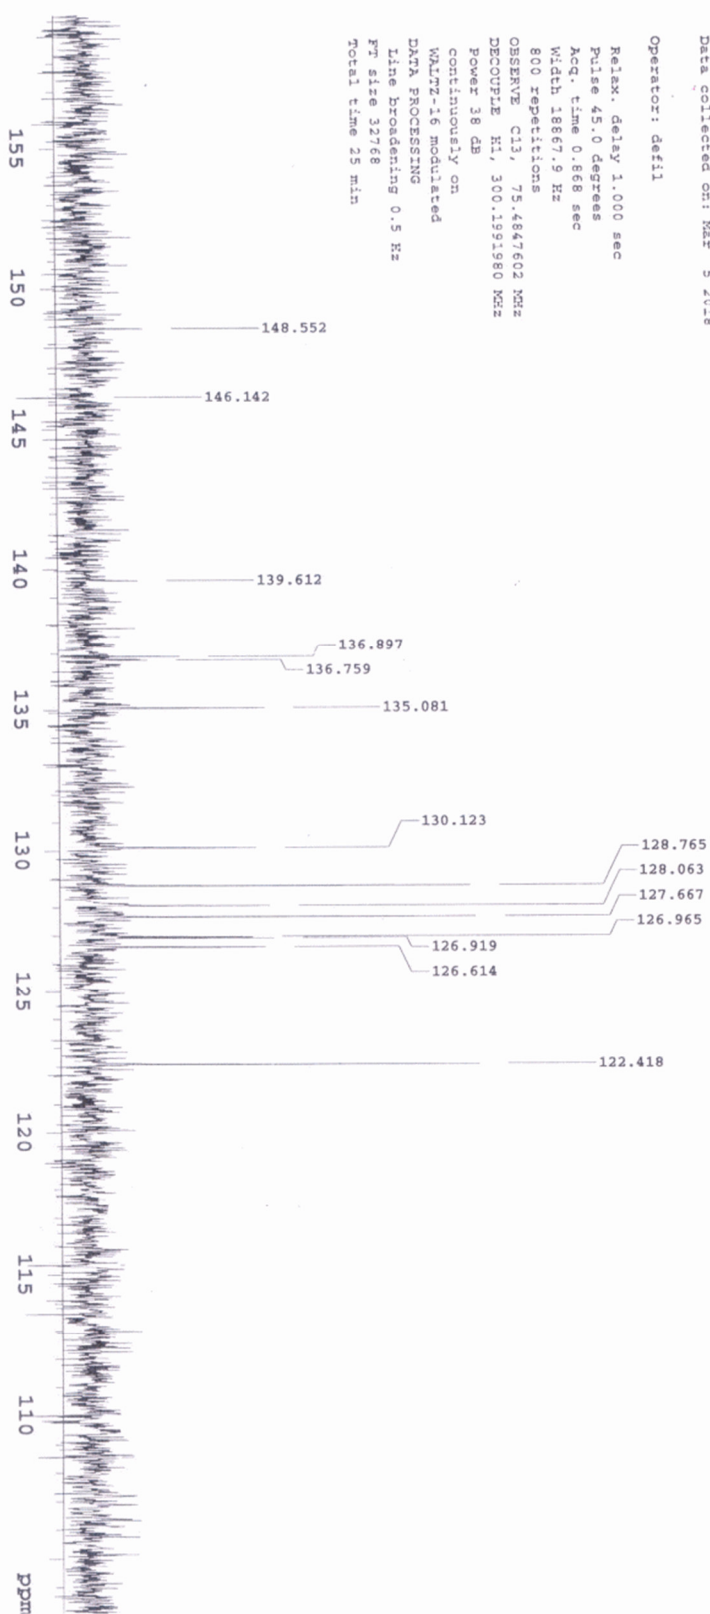





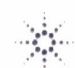

Agilent Technologies

Sample Name:

DF1195\_6C

Data Collected on:

m300-mercury300

Archive directory:

Sample directory:

Fidfile: CARBON

Pulse Sequence: CARBON (s2pul)

Solvent: cdcl3

Data collected on: Mar 10 2021

Operator: defil

Relax. delay 1.000 sec

Pulse 45.0 degrees

Acq. time 0.868 sec

Width 18867.9 Hz

2341 repetitions

OBSERVE C13, 75.4847602 MHz

DECOUPLE H1, 300.1991980 MHz

Power 38 dB

continuously on

WALTZ-16 modulated

DATA PROCESSING

Line broadening 0.5 Hz

FT size 32768

Total time 1 hr, 20 min

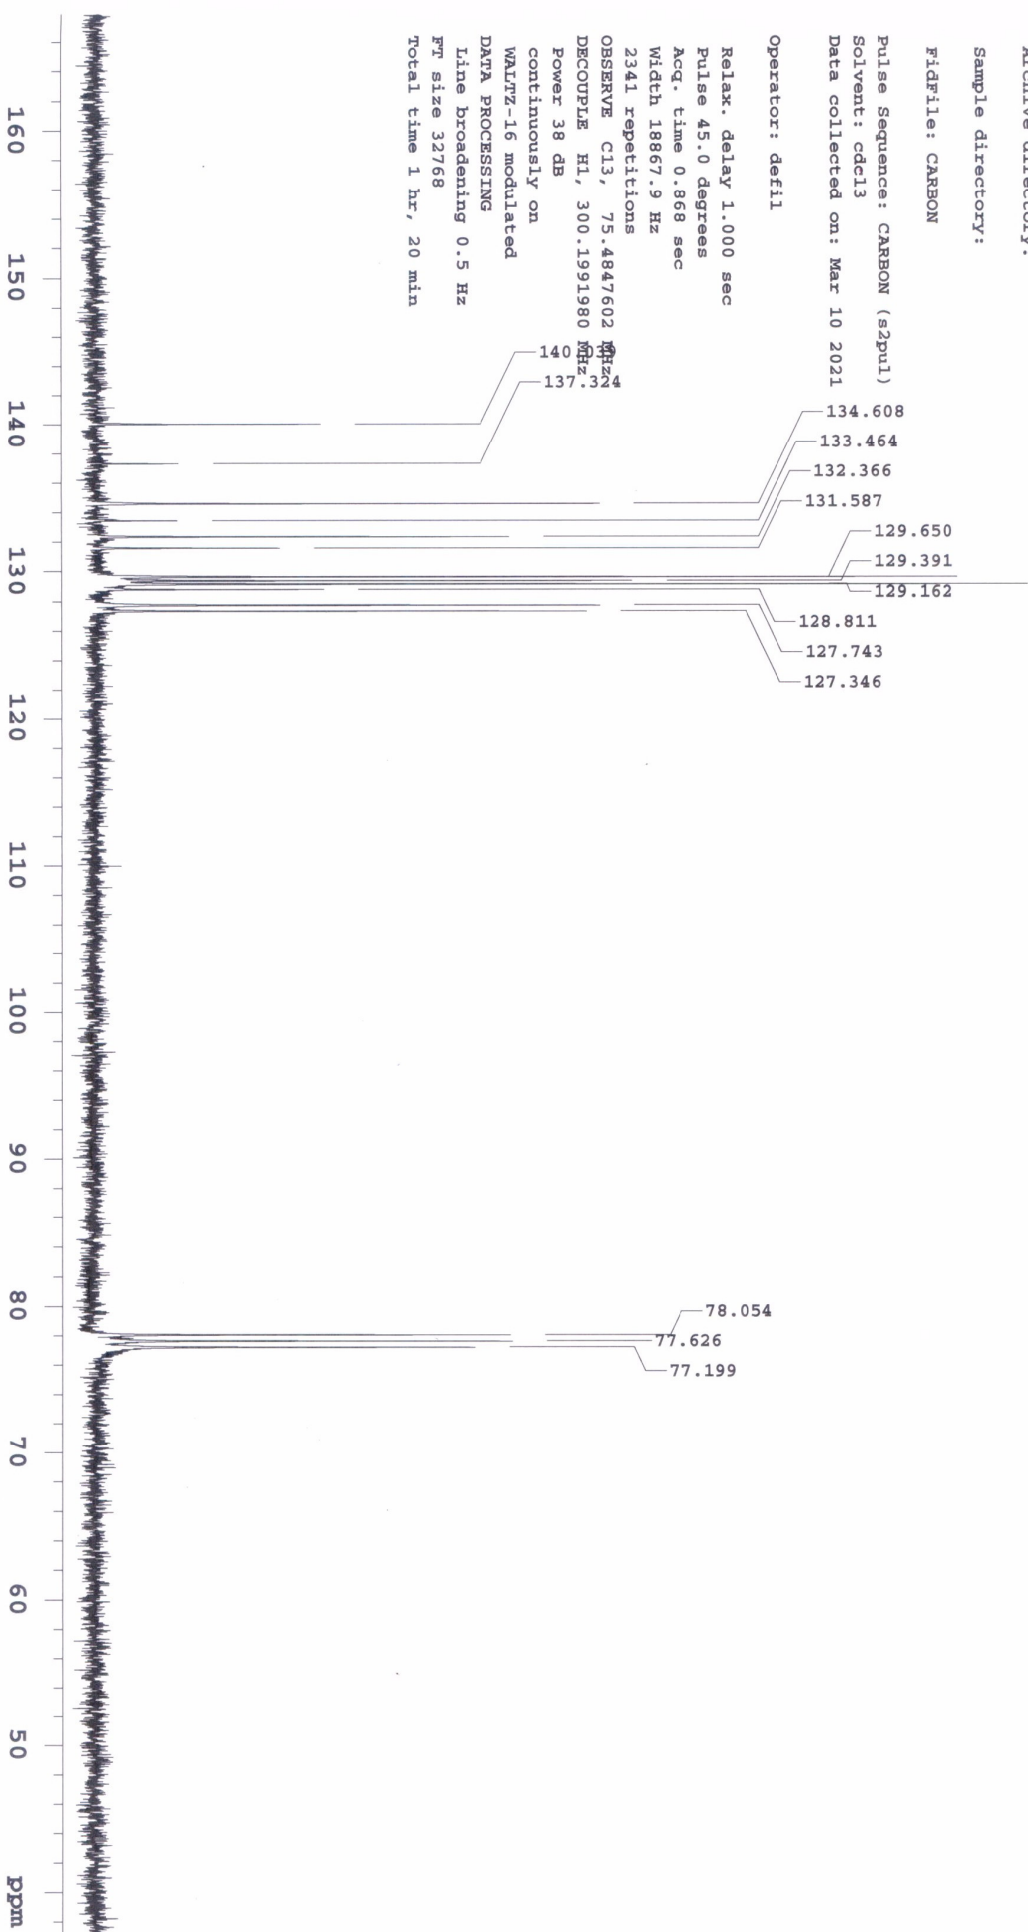

**Figure S13:**  $^1\text{H}$  NMR and  $^{13}\text{C}$  spectrum (300 MHz,  $\text{CDCl}_3$ ) of  
*3-nitro-N-{4-[(E)-2-phenylvinyl]phenyl}benzenesulfonamide 2b*

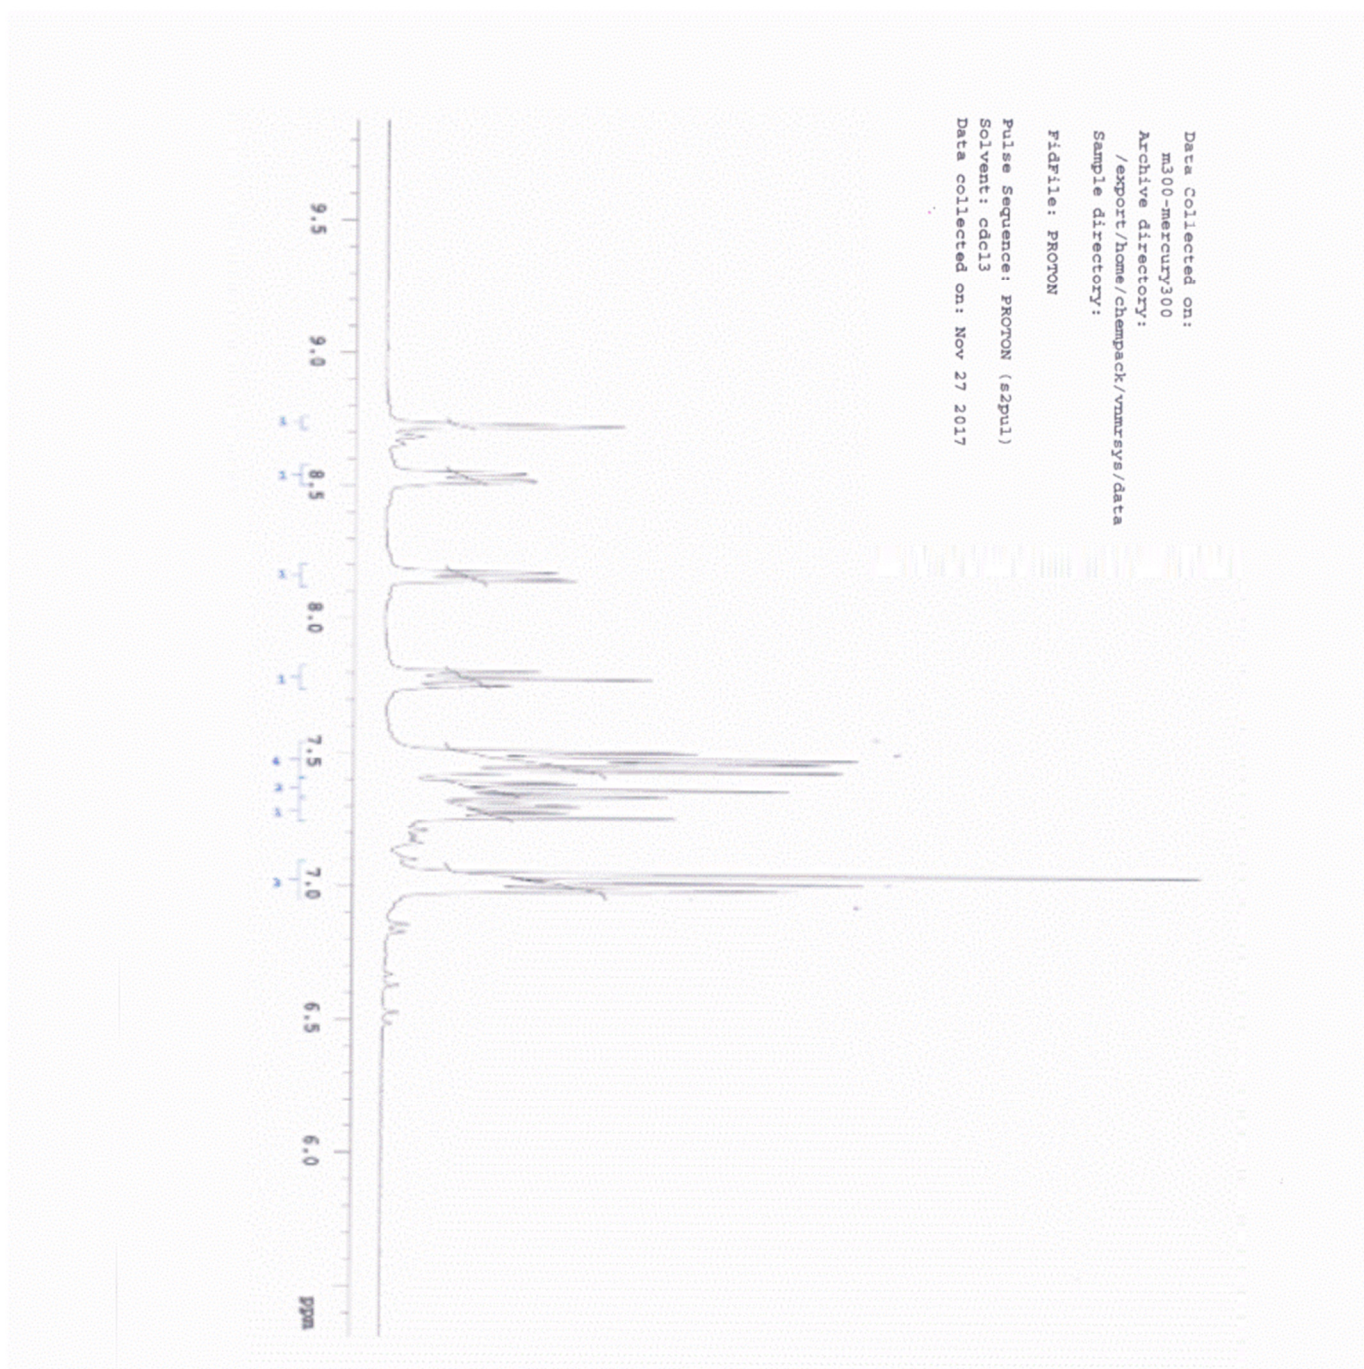

Sample Name:

Data Collected on:  
m300-mercury300  
Archive directory:  
/export/home/chempack/vnmr/sys/data  
Sample directory:

Fidfile: CARBON

Pulse Sequence: CARBON (s2pul)  
Solvent: cdcl3  
Data collected on: Nov 27 2017

Operator: defil

Relax. delay 1.000 sec  
Pulse 45.0 degrees  
Acq. time 0.868 sec  
Width 18867.9 Hz  
800 repetitions  
OBSERVE C13, 75.4847602 MHz  
DECOUPLE H1, 300.1991980 MHz  
Power 38 dB  
continuously on  
WALTZ-16 modulated  
DATA PROCESSING  
Line broadening 0.5 Hz  
Ft size 32768  
Total time 25 min

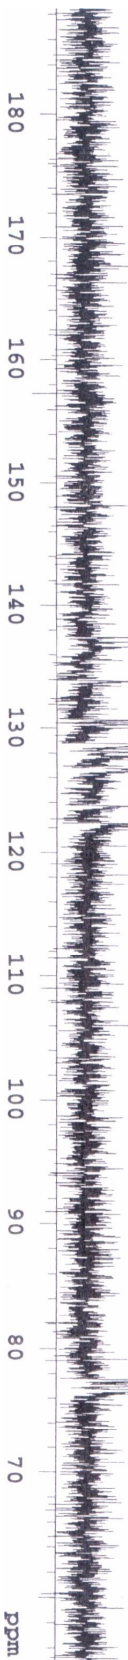

**Figure S14:**  $^1\text{H}$  NMR(300 MHz,  $\text{CDCl}_3$ ) and  $^{13}\text{C}$  spectra (300 MHz,  $\text{CDCl}_3$ ) of 4-methyl-3-nitro-N-{4-[(E)-2-phenylvinyl]phenyl}benzenesulfonamide **2c**

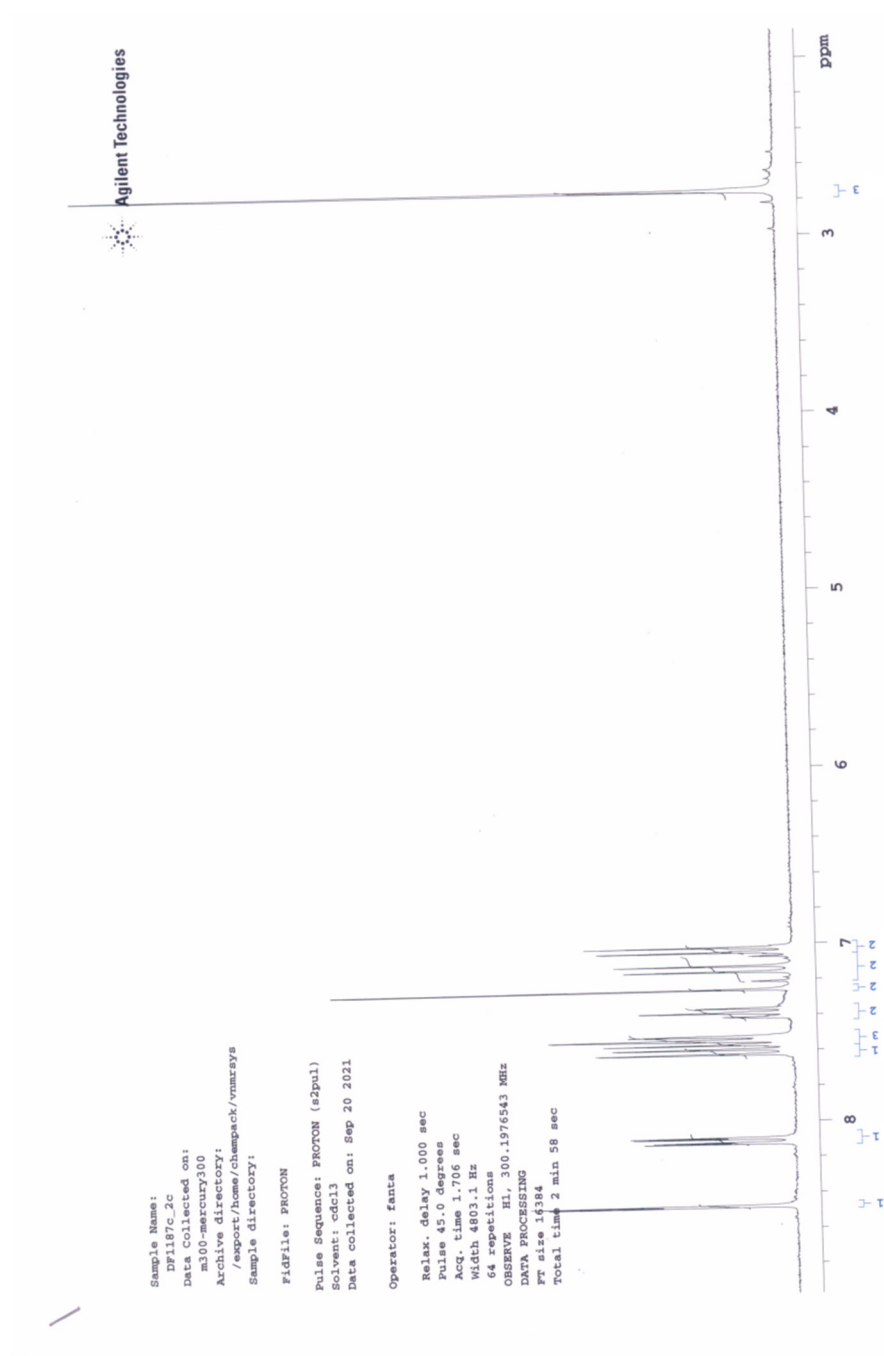



Gradient Shimming

Sample Name:

Data Collected on:

m300-mercury300

Archive directory:

/export/home/chempack/vnmr/sys/data

Sample directory:

Fidfile: CARBON

Pulse Sequence: CARBON (szpul)

Solvent: cdc13

Data collected on: May 15 2018

Operator: defil

Relax. delay 1.000 sec

Pulse 45.0 degrees

Acq. time 0.868 sec

Width 18867.9 Hz

1297 repetitions

OBSERVE C13, 75.4847602 MHz

DECOUPLE H1, 300.1991980 MHz

Power 38 dB

continuously on

WALTZ-16 modulated

DATA PROCESSING

Line broadening 0.5 Hz

FT size 32768

Total time 48 min

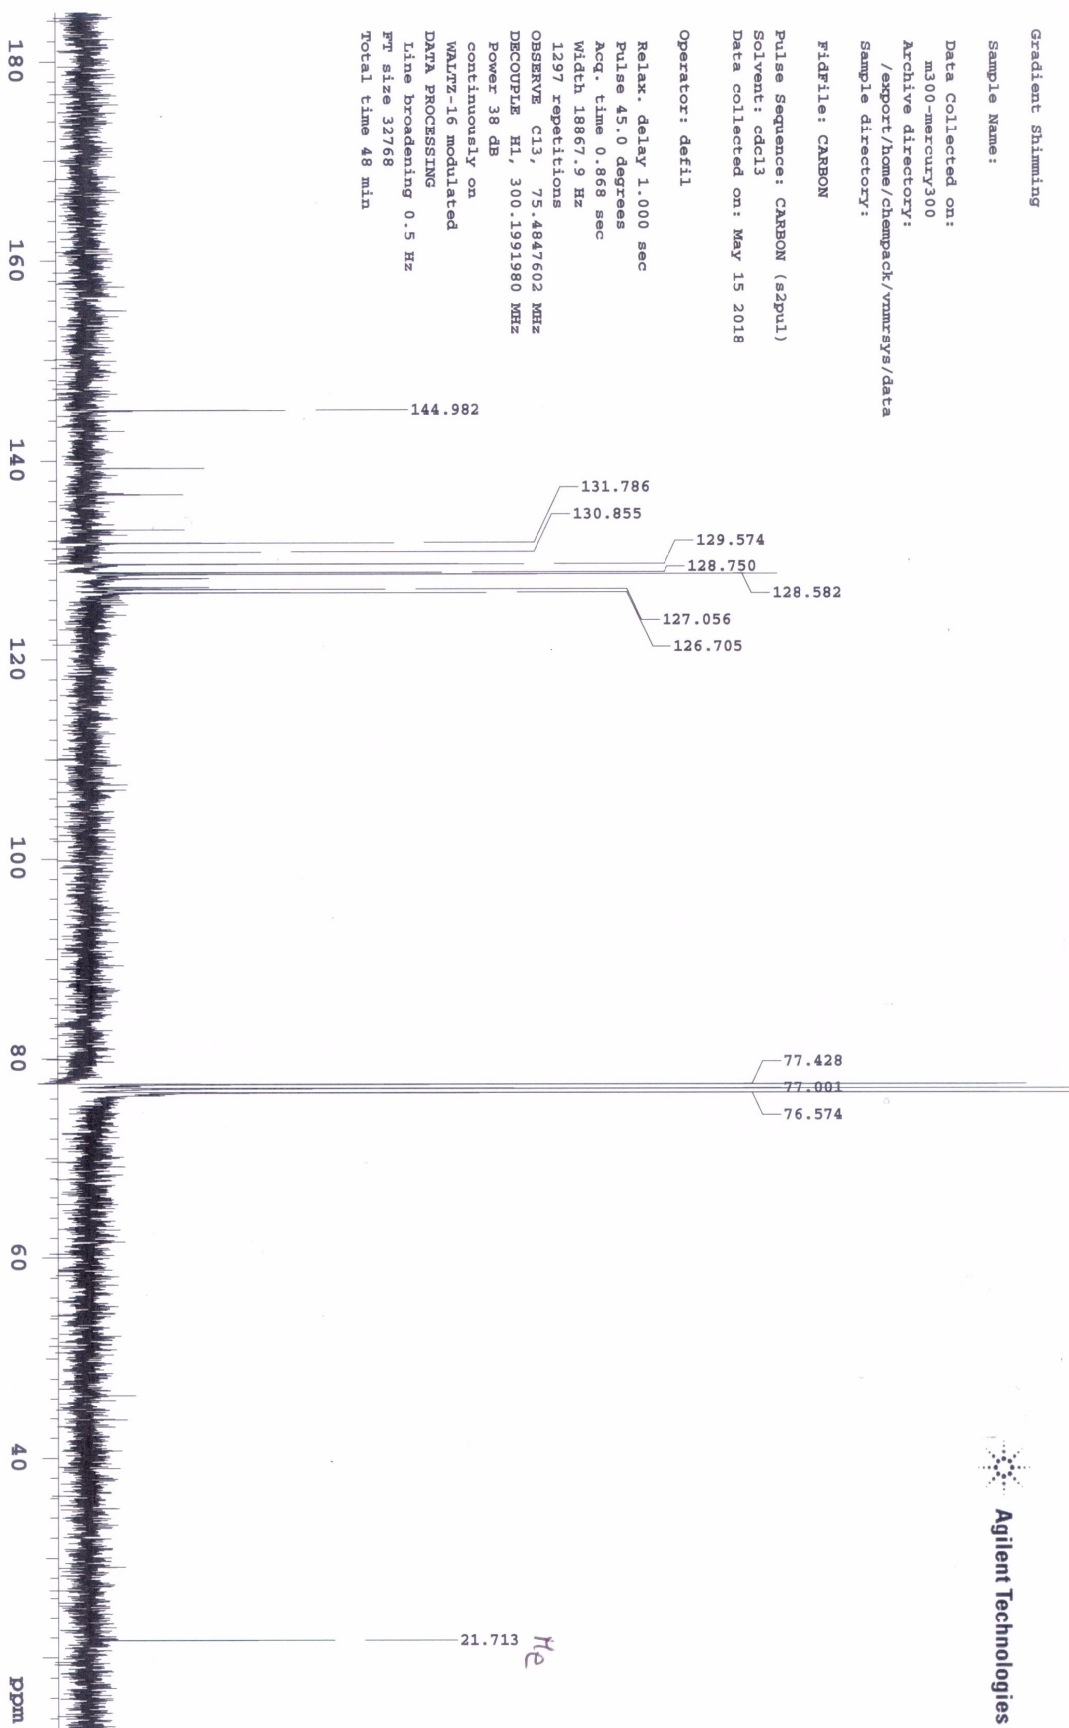

**Figure S15:**  $^1\text{H}$  NMR and  $^{13}\text{C}$  spectrum (300 MHz,  $\text{CDCl}_3$ ) of 4-methyl-*N*-{4-[(*E*)-2-phenylvinyl]phenyl}benzenesulfonamide **2d**

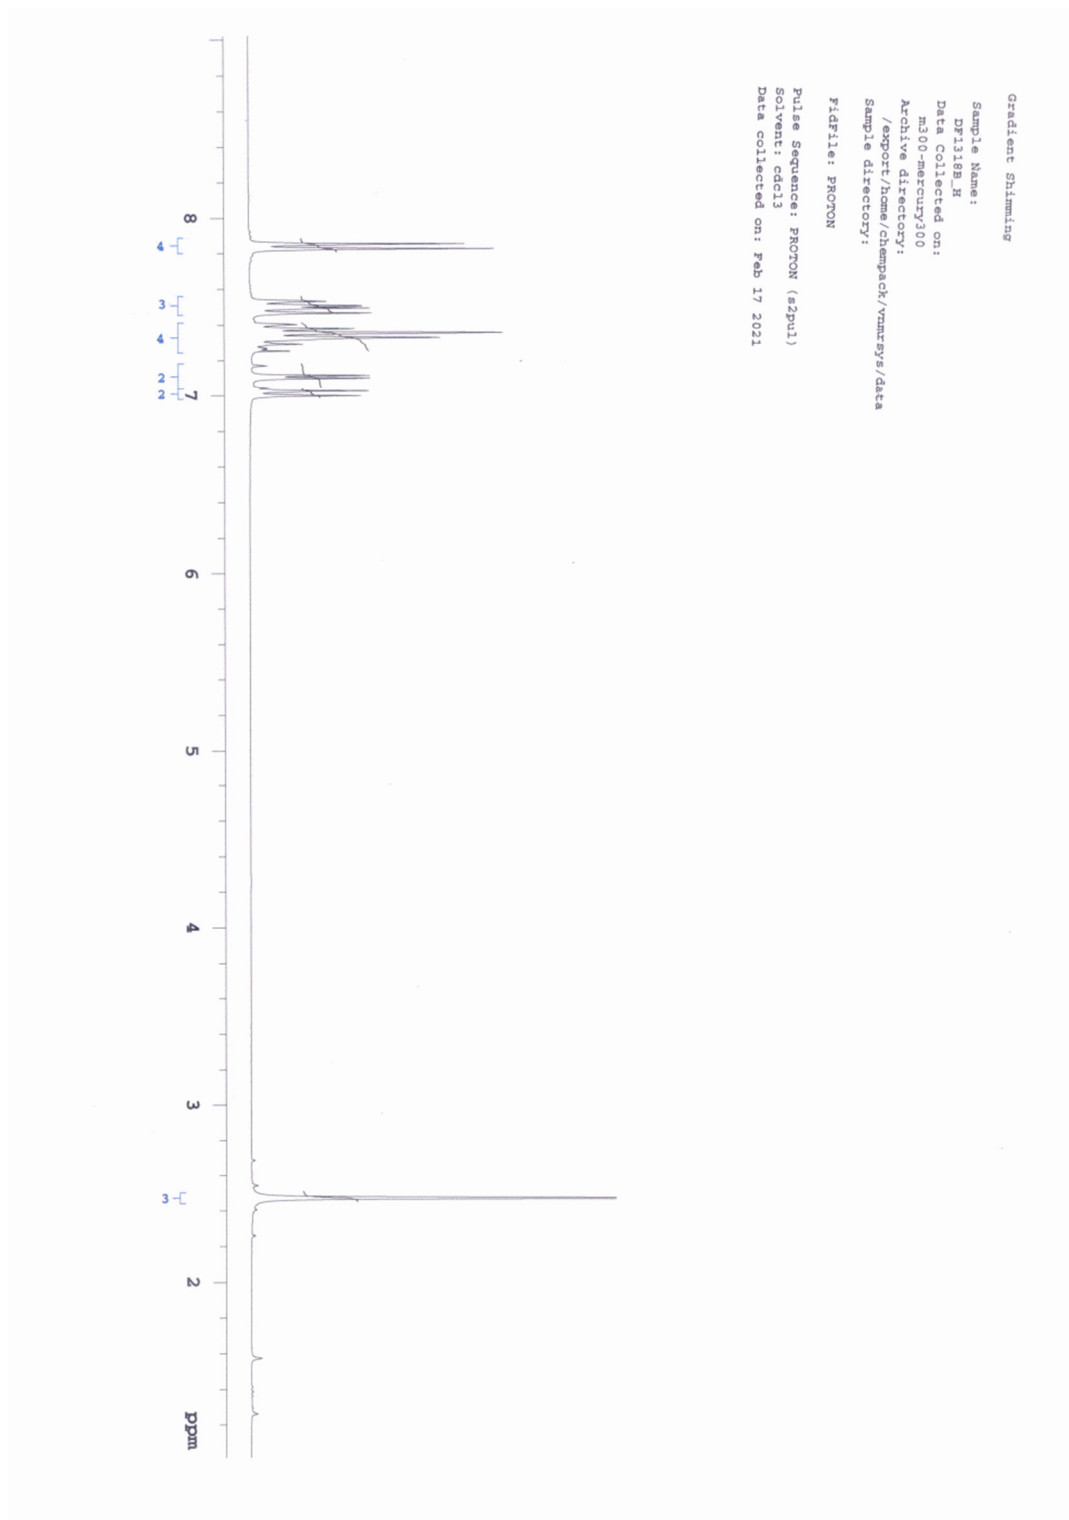

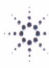

Sample Name:

DF13185\_H

Data Collected on:

m300-mercury300

Archive directory:

Sample directory:

Fidfile: CARBON

Pulse Sequence: CARBON (s2pul)

Solvent: cdcl3

Data collected on: Feb 18 2021

Operator: defil

Relax. delay 1.000 sec  
Pulse 45.0 degrees  
Acq. time 0.868 sec  
Width 18867.9 Hz

1500 repetitions

OBSERVE C13, 75.4847602 MHz

DECOUPLE H1, 300.1991980 MHz

Power 38 dB

continuously on

WALTZ-16 modulated

DATA PROCESSING

Line broadening 0.5 Hz

FT size 32768

Total time 48 min

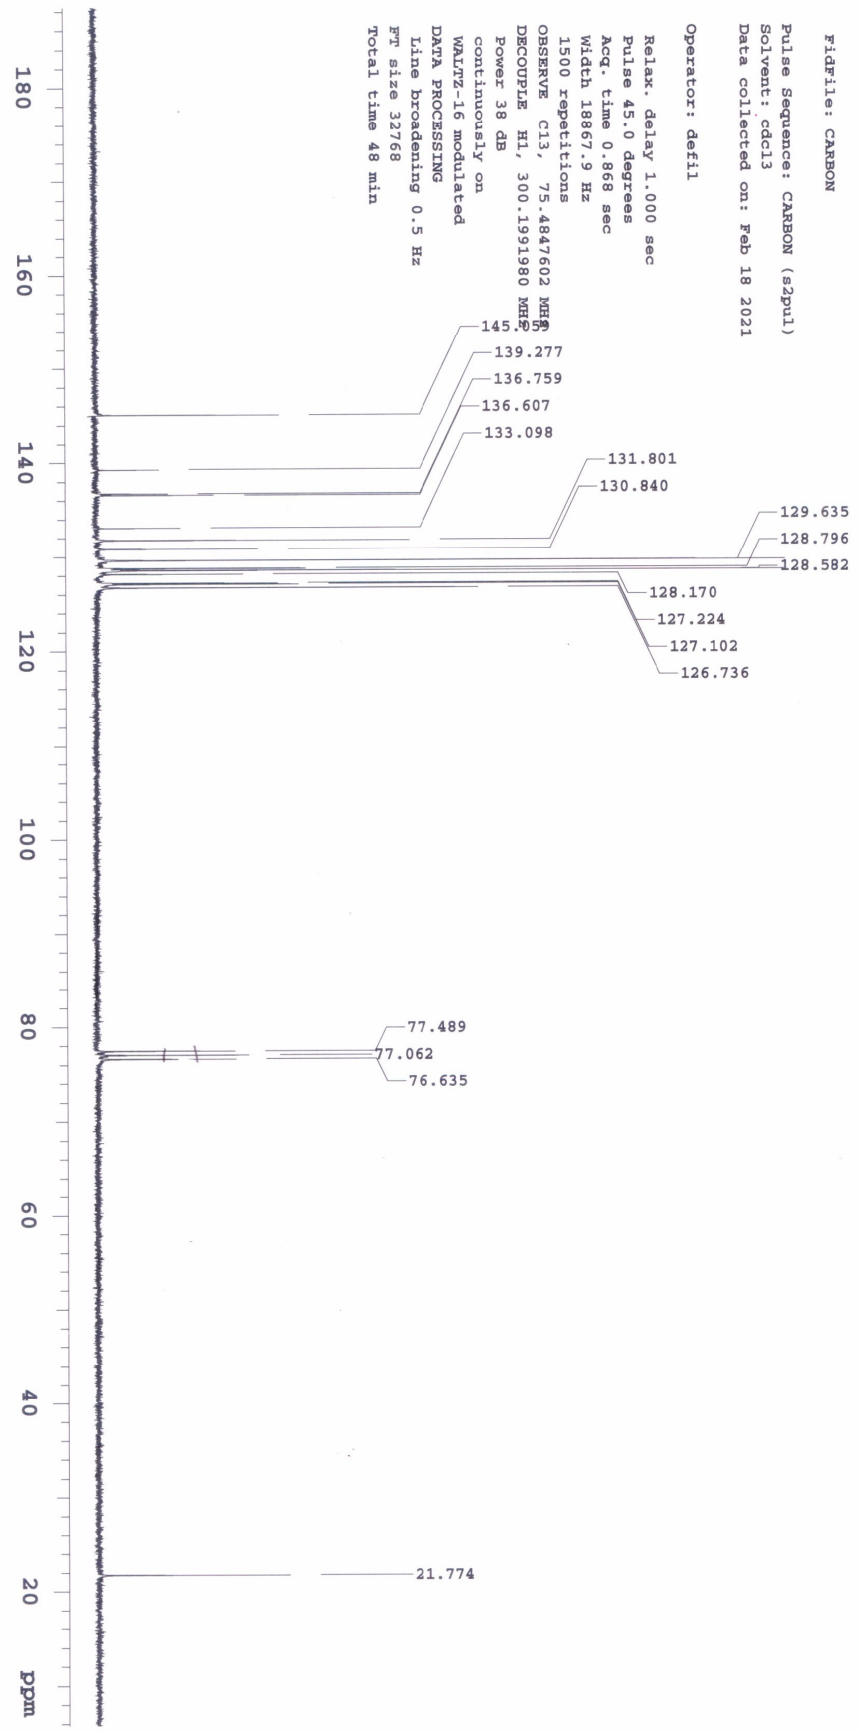

*4-cyano-N-{4-[ (E)-2-phenylvinyl]phenyl}benzenesulfonamide 2e*

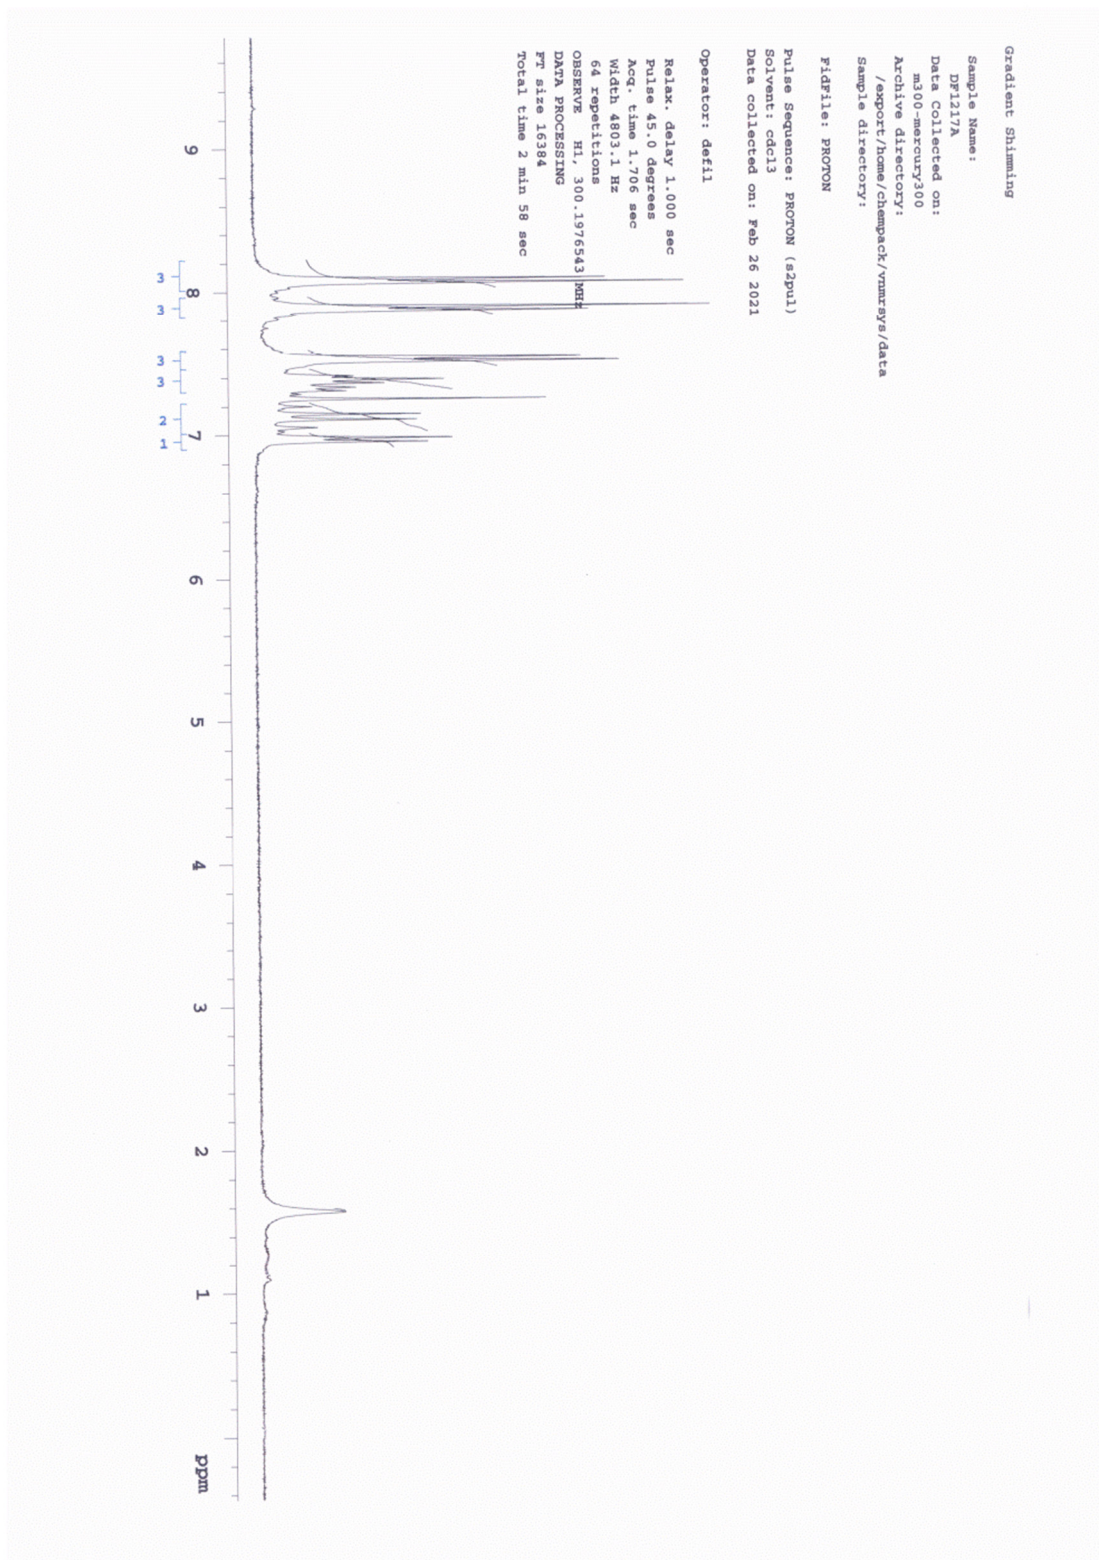



Gradient Shimming

Sample Name:

DF1217A

Data Collected on:

m300-mercury300

Archive directory:

/export/home/chempack/vnmrsys/data

Sample directory:

Fidfile: CARBON

Pulse Sequence: CARBON (s2h13)

Solvent: cdcl3

Data collected on: Feb 26 2021

Operator: defil

Relax. delay 1.000 sec

Pulse 45.0 degrees

Acq. time 0.868 sec

Width 18867.9 Hz

1844 repetitions

OBSERVE C13, 75.4847602 MHz

DECOUPLE H1, 300.1991980 MHz

Power 38 dB

continuously on

WALTZ-16 modulated

DATA PROCESSING

Line broadening 0.5 Hz

FT size 32768

Total time 1 hr, 4 min

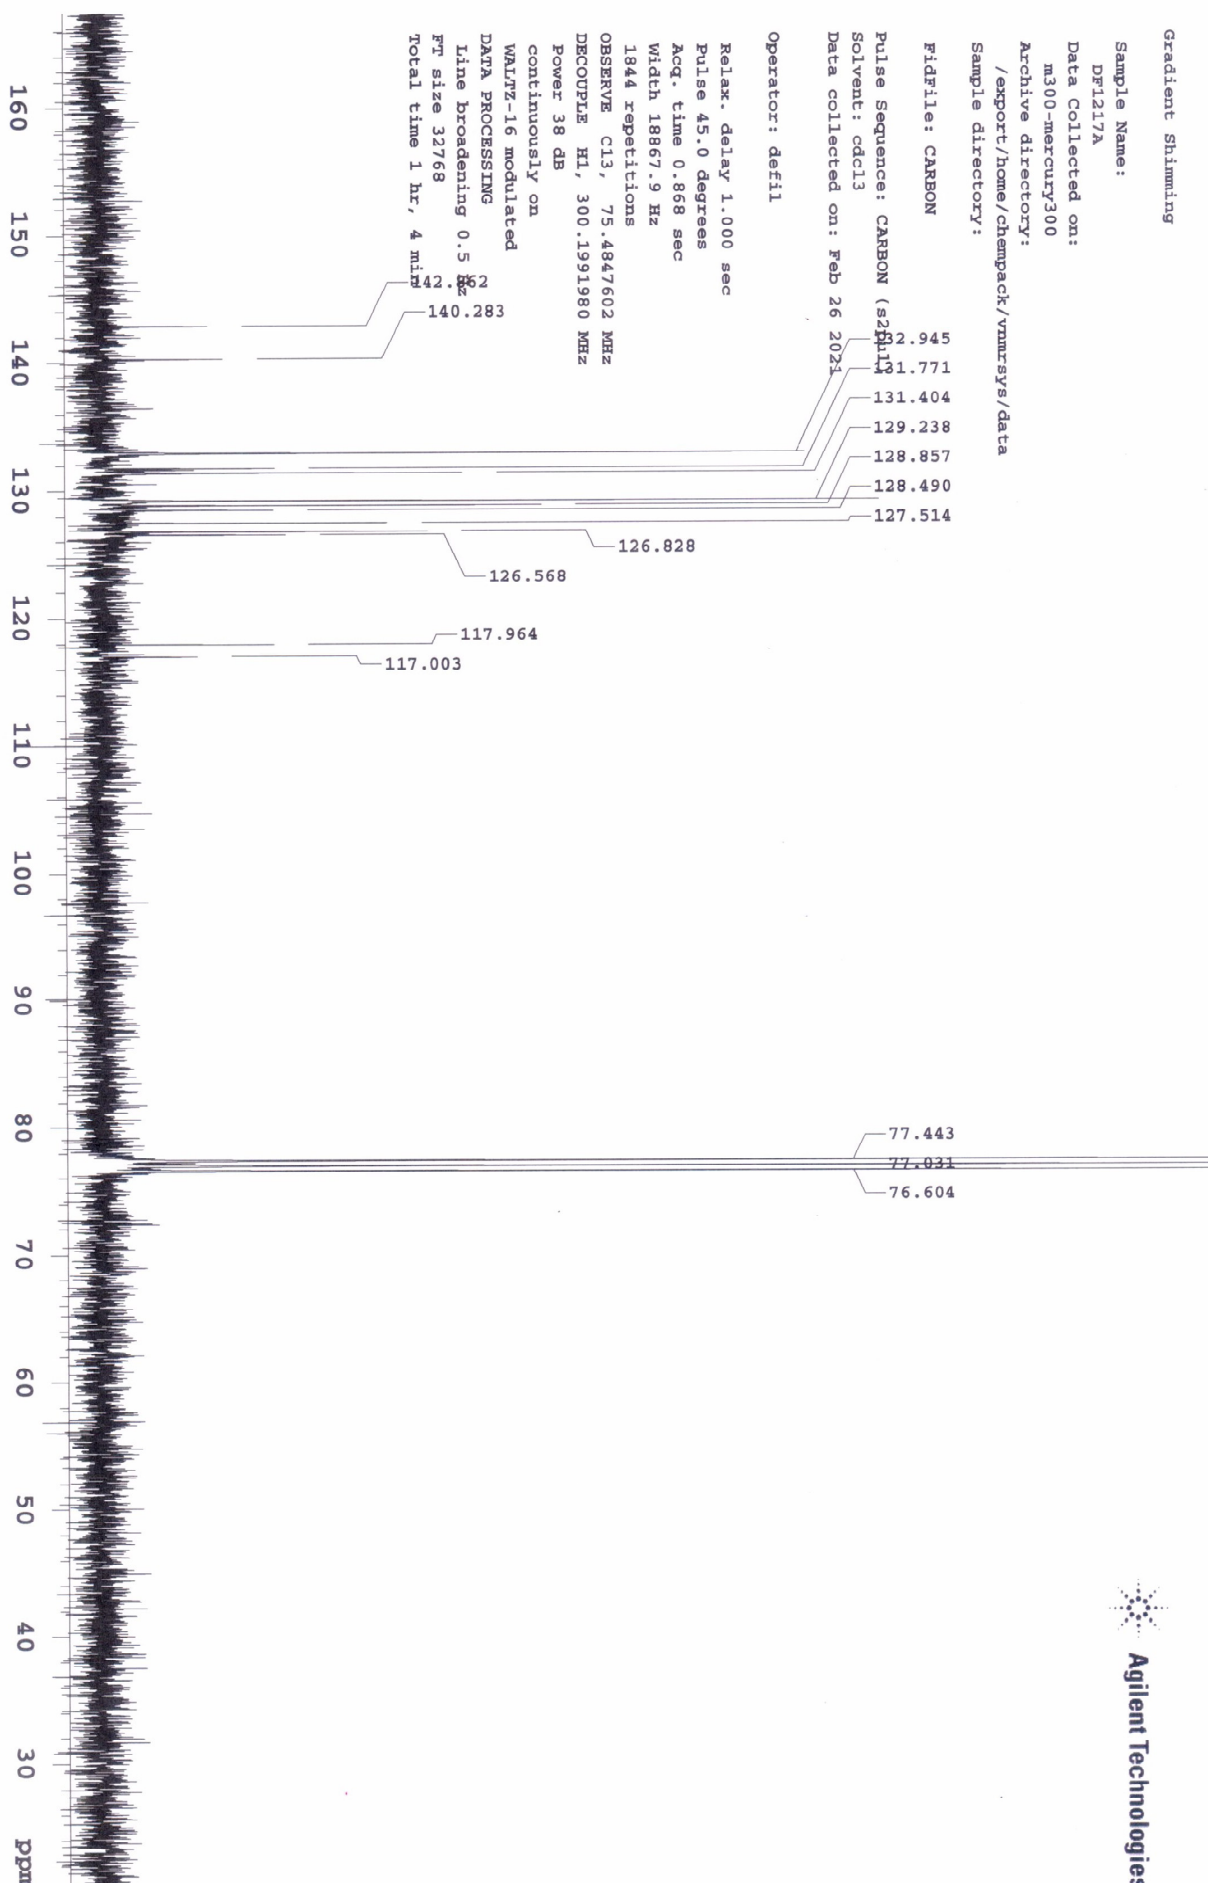

**Figure S17:**  $^1\text{H}$  NMR (300 MHz, Acetone- $d_6$ ) and  $^{13}\text{C}$  spectrum (300 MHz,  $\text{CDCl}_3$ ) of *N*-{4-[(4-[(*E*)-2-phenylvinyl]phenyl)amino)sulfonyl]phenyl}acetamide **2f**

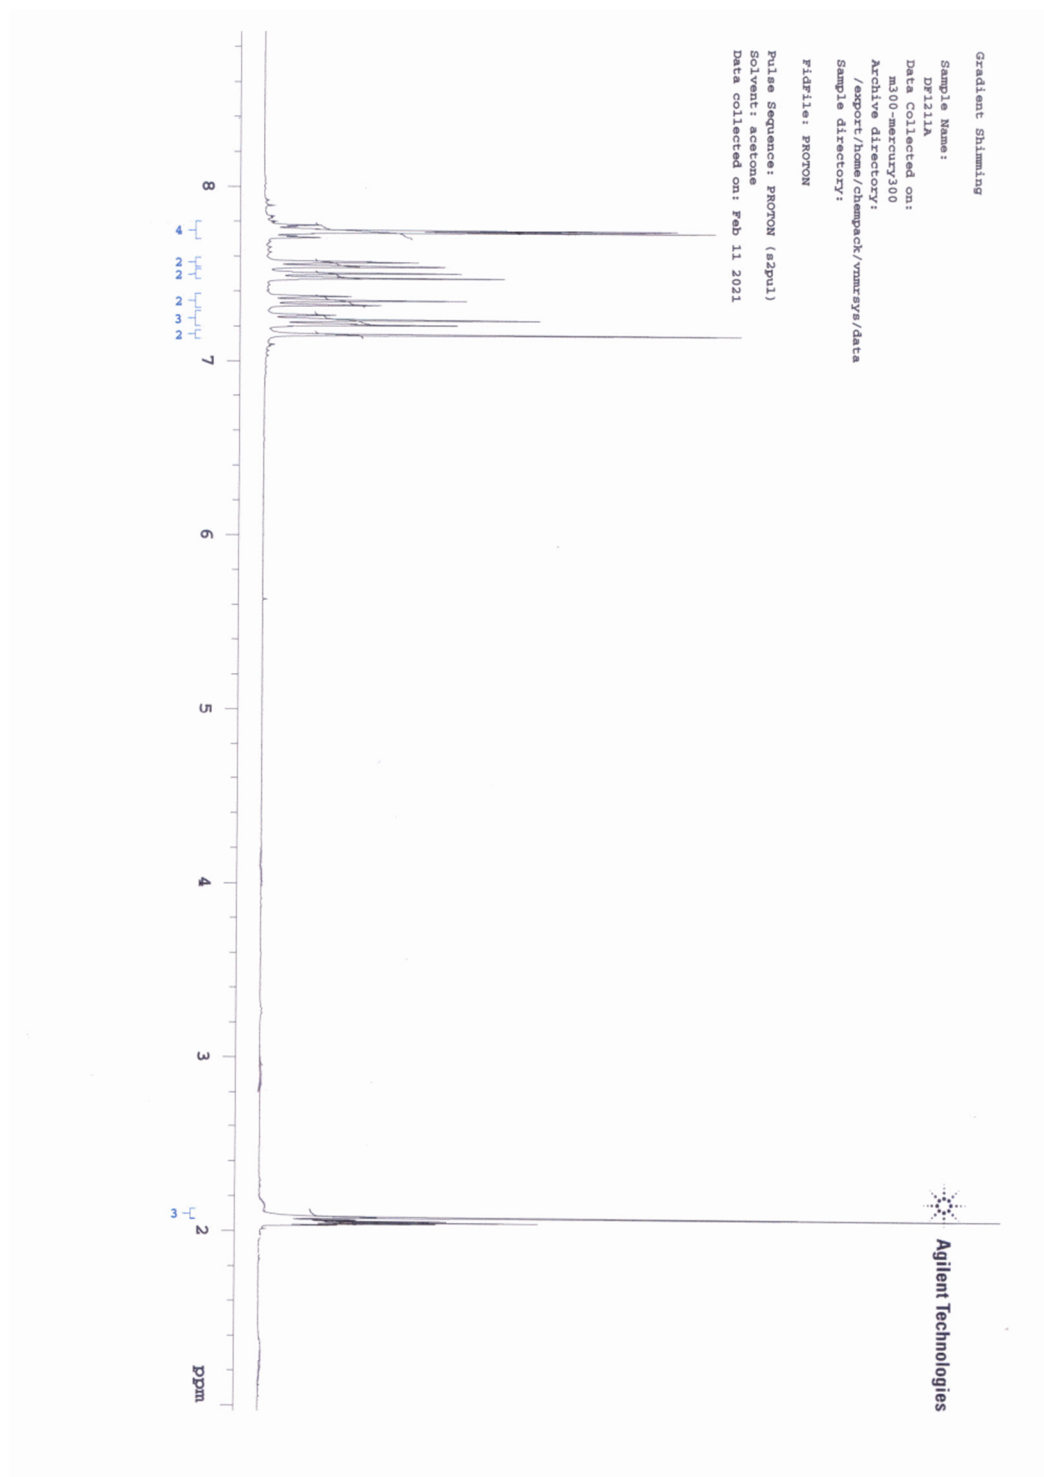

Gradient Shimming  
Sample Name:  
DF1211A  
Data Collected on:  
m300-mercury300  
Archive directory:  
/export/home/chempack/vnmrSYS/data  
Sample directory:

F1 file: CARBON  
Pulse Sequence: CARBON (szpul)  
Solvent: acetone  
Data collected on: Feb 11 2021

Operator: defil  
Relax. delay 1.000 sec  
Pulse 45.0 degrees  
Acq. time 0.868 sec  
Width 18867.9 Hz  
2000 repetitions  
OBSERVE C13, 75.4851520 MHz  
DECOUPLE H1, 300.2007551 MHz  
Power 38 dB  
continuously on  
WALTZ-16 modulated  
DATA PROCESSING  
Line broadening 0.5 Hz  
F1 size 32768  
Total time 1 hr, 4 min

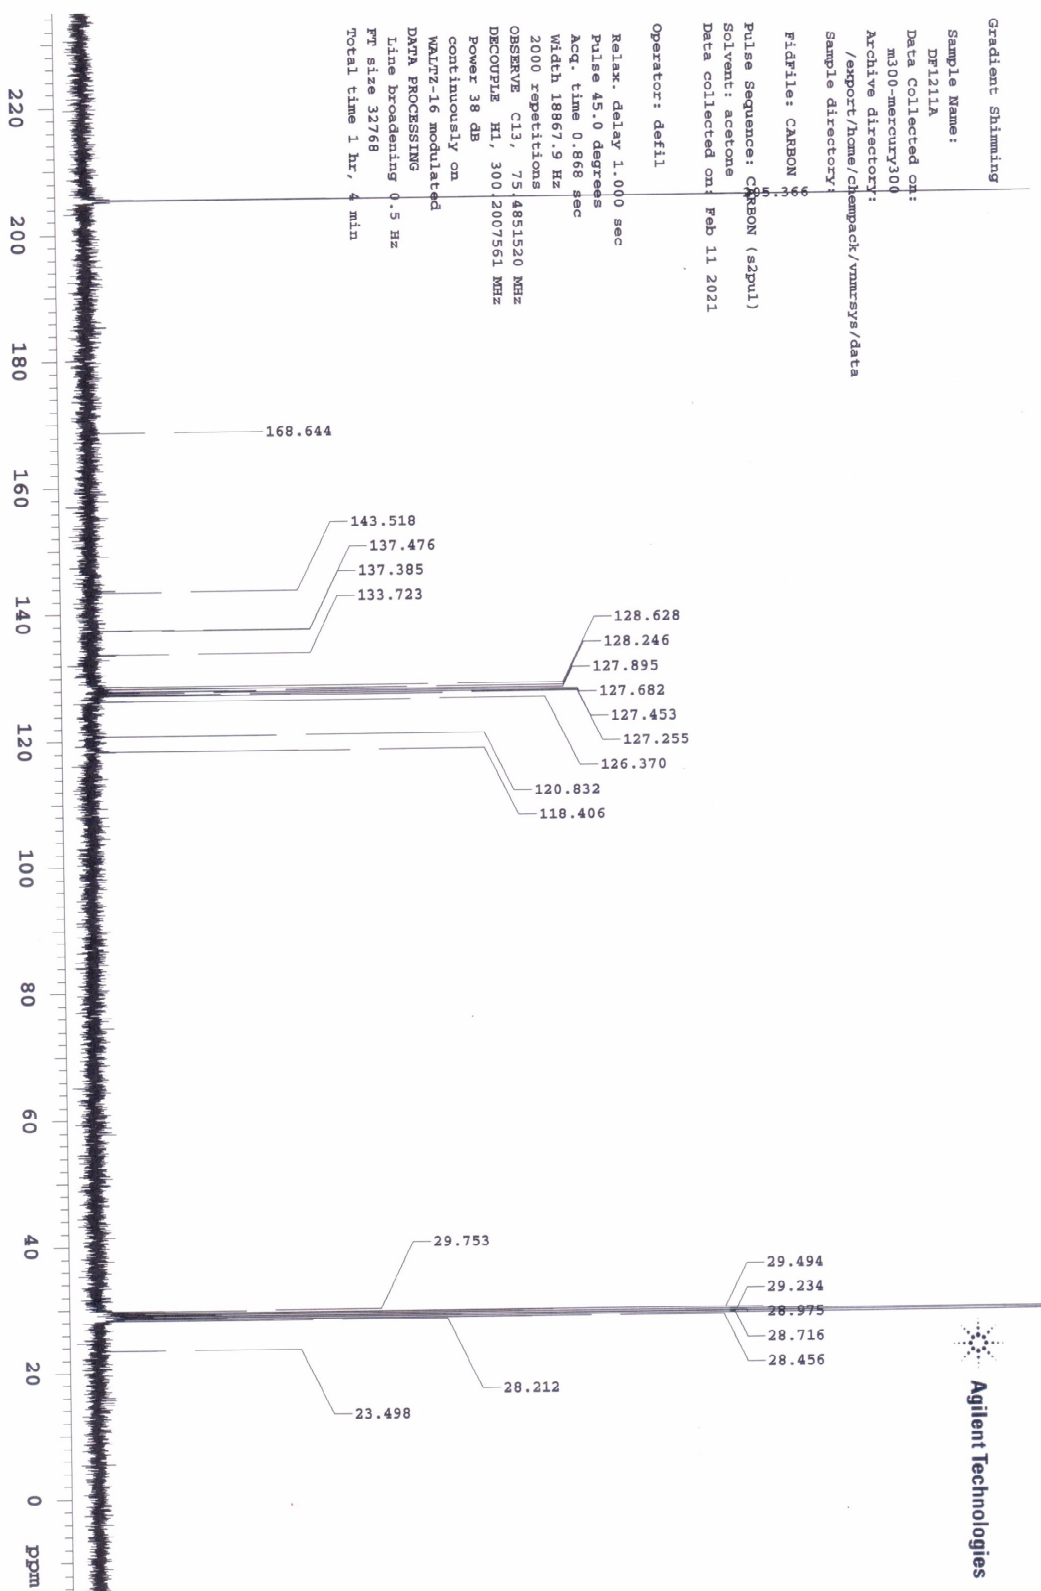

Gradient Shimming

Sample Name:  
DP1207C

Data Collected on:  
m300-mercury300

Archive directory:  
/export/home/chempack/vnmrsws/data

Sample directory:

FidFile: PROTON

Pulse Sequence: PROTON (s2pul)

Solvent: cdcl3

Data collected on: Mar 3 2021

Operator: defil

Relax. delay 1.000 sec

Pulse 45.0 degrees

Acq. time 1.706 sec

Width 4803.1 Hz

128 repetitions

OBSERVE H1 300.197543 MHz

DATA PROCESSING

FT size 16384

Total time 5 min 35 sec

7.5 7.0 6.5 6.0 5.5 5.0 4.5 4.0 3.5 3.0 2.5 ppm



Gradient Shimming

Sample Name:

DF1207C

Data Collected on:

m300-mercury300

Archive directory:

/export/home/chempack/vnmrsvs/data

Sample directory:

Fidfile: CARBON

Pulse Sequence: CARBON (s2pul1)

Solvent: cdcl3

Data collected on: Mar 3 2021

Operator: defil

Relax. delay 1.000 sec

Pulse 45.0 degrees

Acq. time 0.868 sec

Width 18867.9 Hz

2000 repetitions

OBSERVE C13, 75.4847602 MHz

DECOUPLE H1, 300.1991980 MHz

Power 38 dB

continuously on

WALTZ-16 modulated

DATA PROCESSING

Line broadening 0.5 Hz

FT size 32768

Total time 4 hr, 4 min

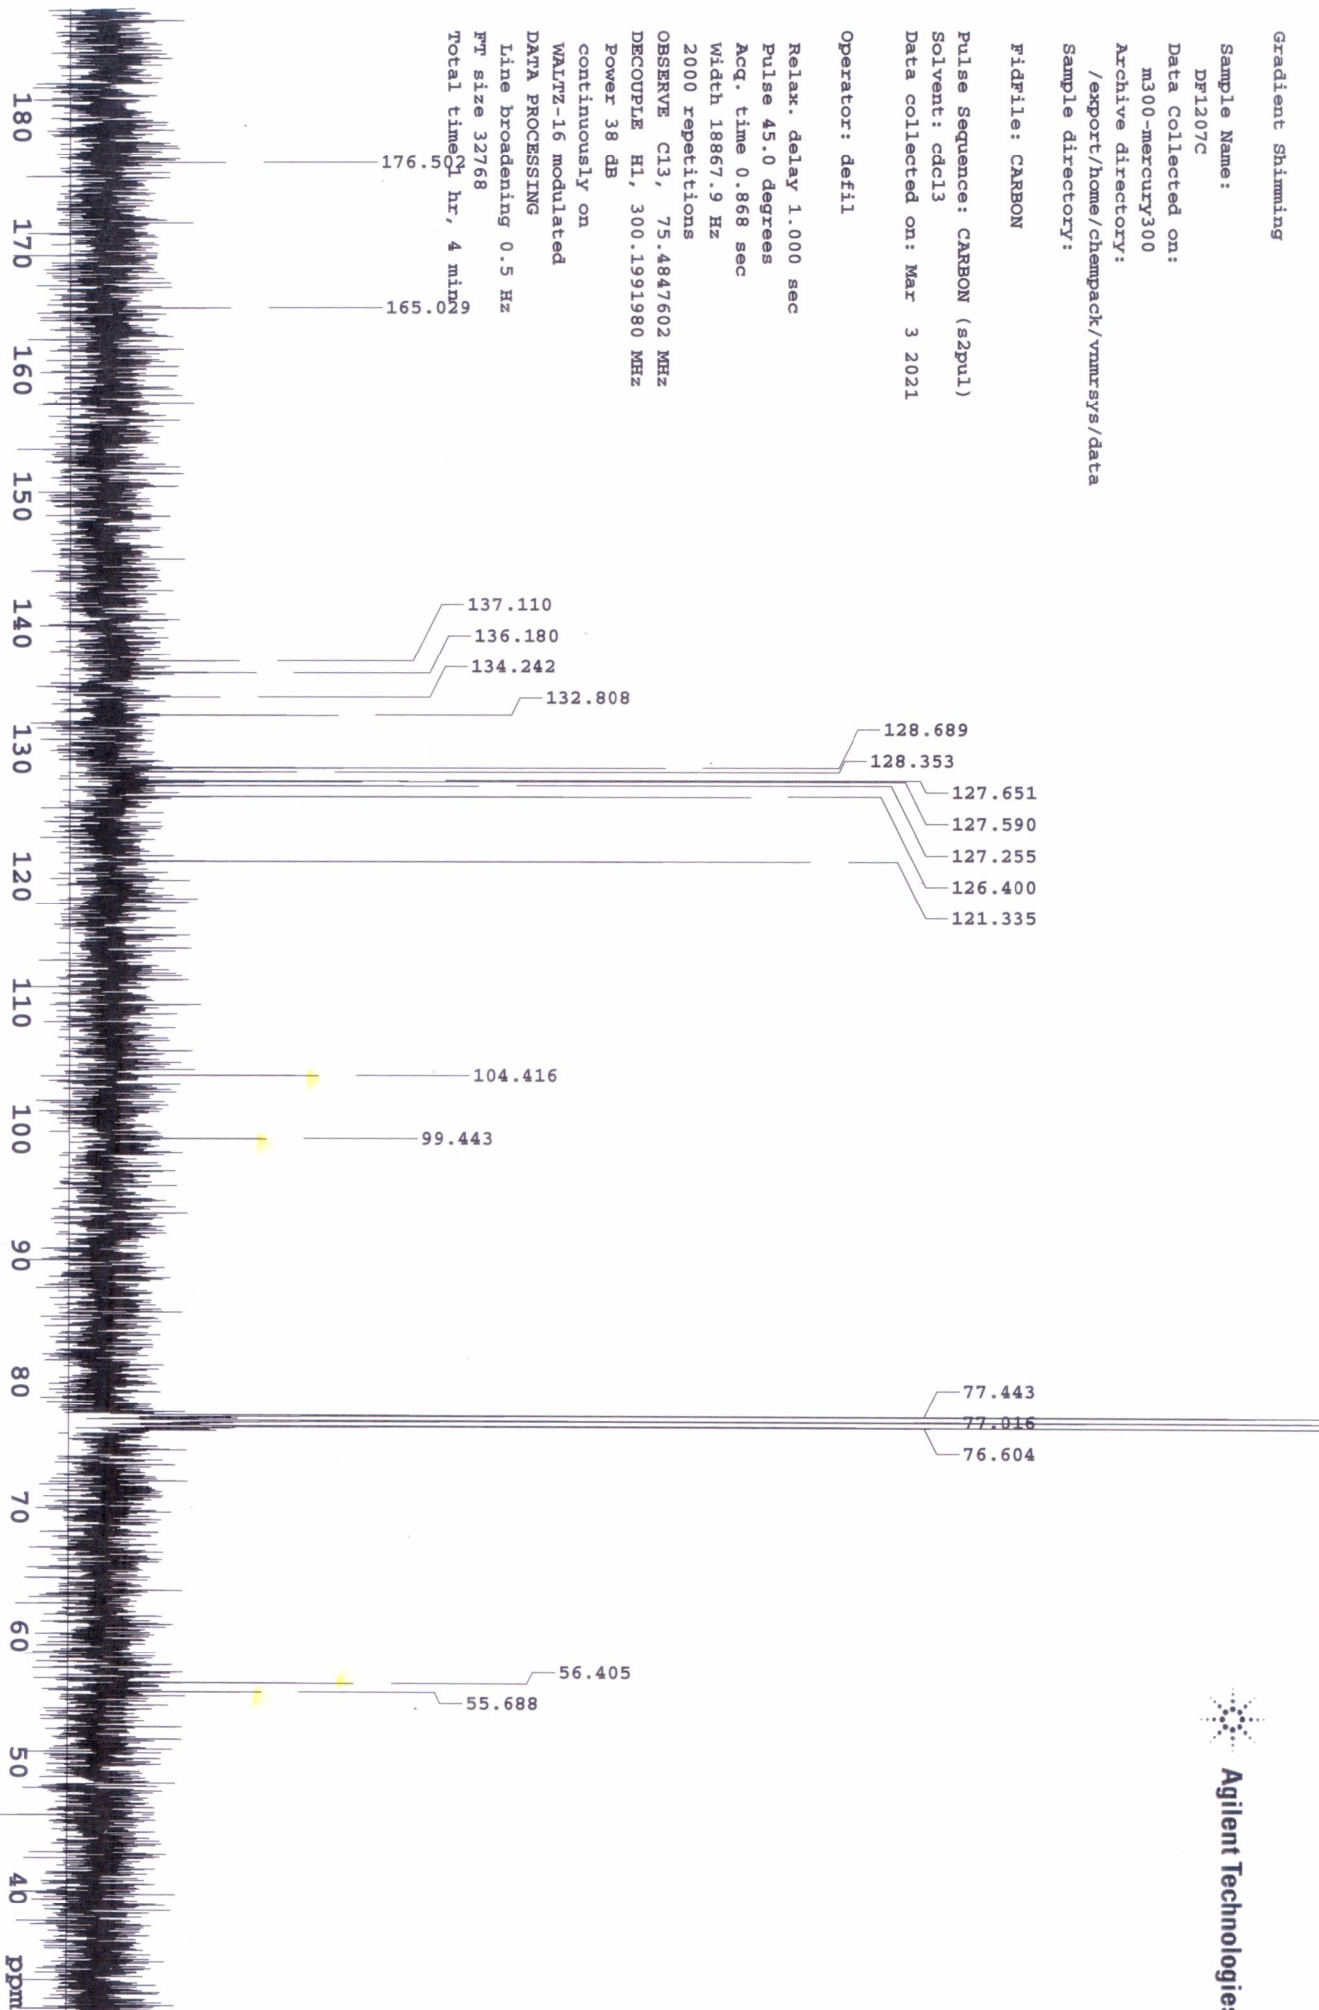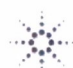

Agilent Technologies

**Figure S19:**  $^1\text{H}$  NMR and  $^{13}\text{C}$  spectrum (300 MHz,  $\text{CDCl}_3$ ) of *N*-{4-[(*E*)-2-phenylvinyl]phenyl}methanesulfonamide **2h**

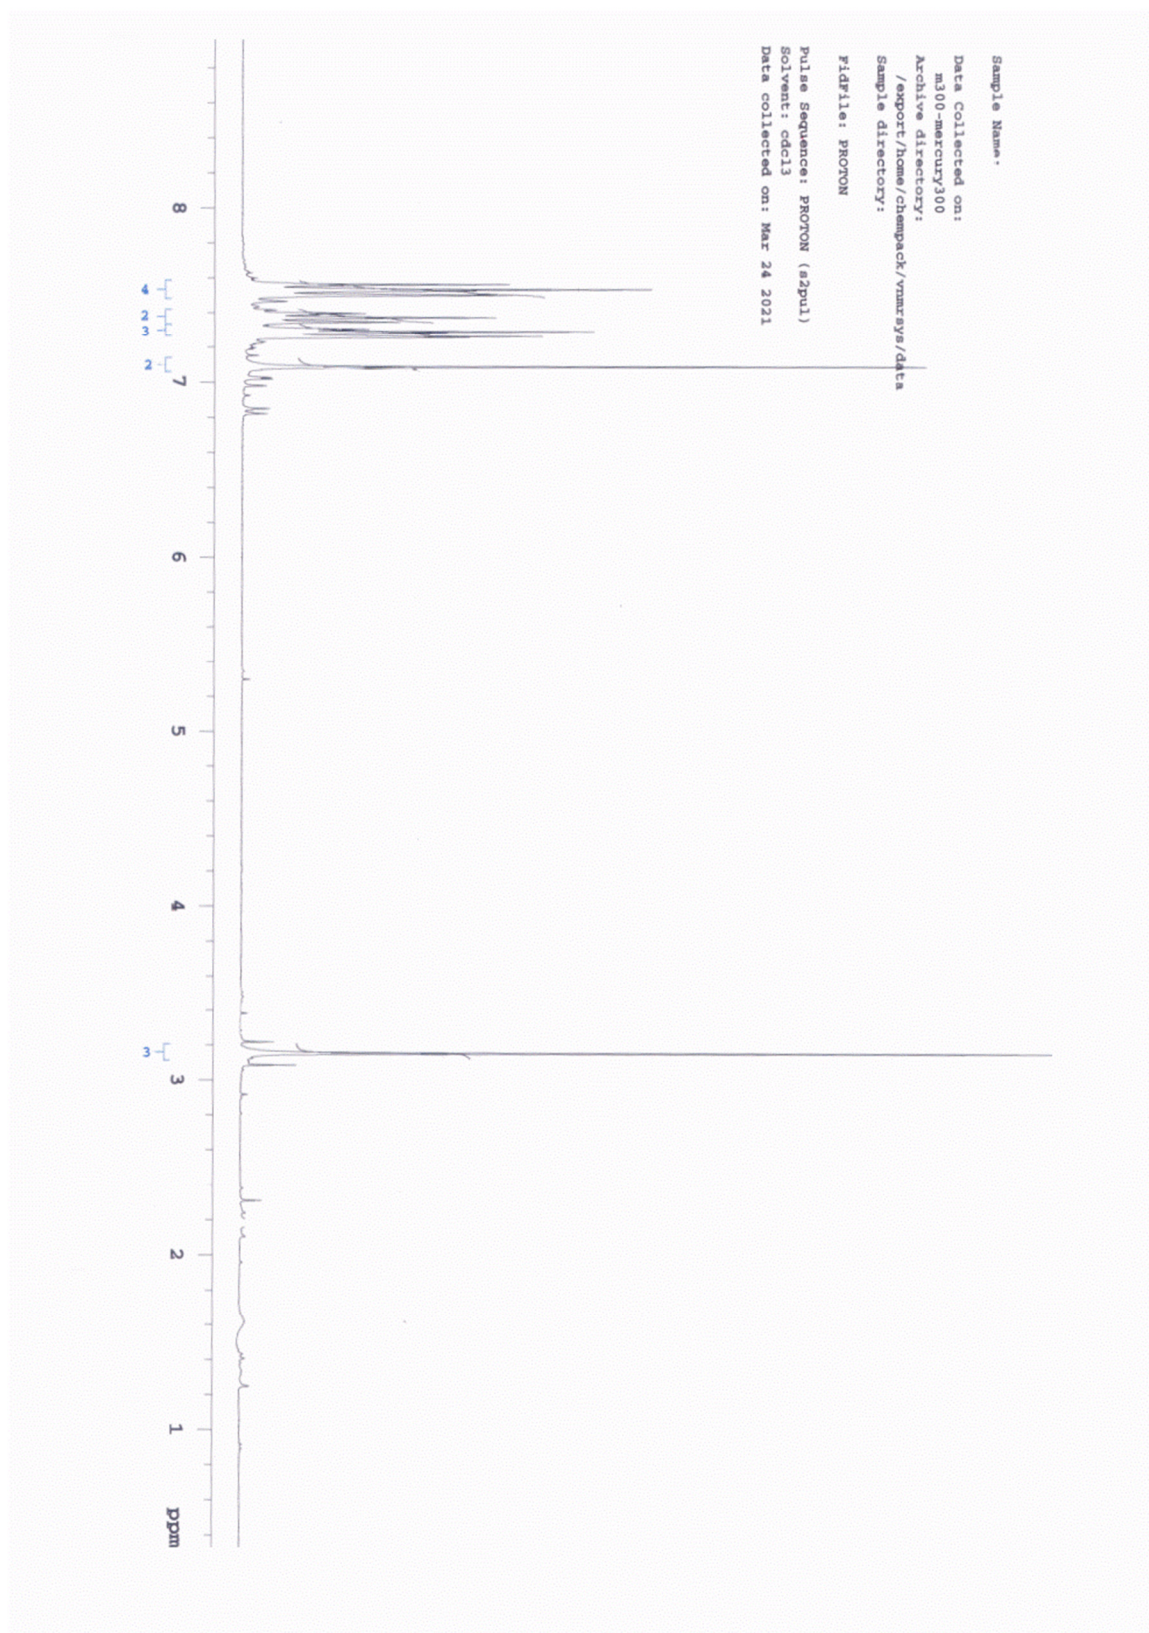

Sample Name:  
Df1213A  
Data Collected on:  
m300-mercury300  
Archive directory:  
/export/home/chempack/vnmr/sys/data  
Sample directory:

F1dFile: CARBON

Pulse Sequence: CARBON (s2pul)  
Solvent: cdcl3  
Data collected on: Jul 2 2021

Operator: fanta

Relax. delay 1.000 sec  
Pulse 45.0 degrees  
Acq. time 0.868 sec  
Width 18867.9 Hz  
2000 repetitions  
OBSERVE C13, 75.4847602 MHz  
DECOUPLE H1, 300.1991980 MHz  
Power 38 dB  
continuously on  
WALTZ-16 modulated  
DATA PROCESSING  
line broadening 0.5 Hz  
Fw size 32768  
Total time 1 hr, 4 min

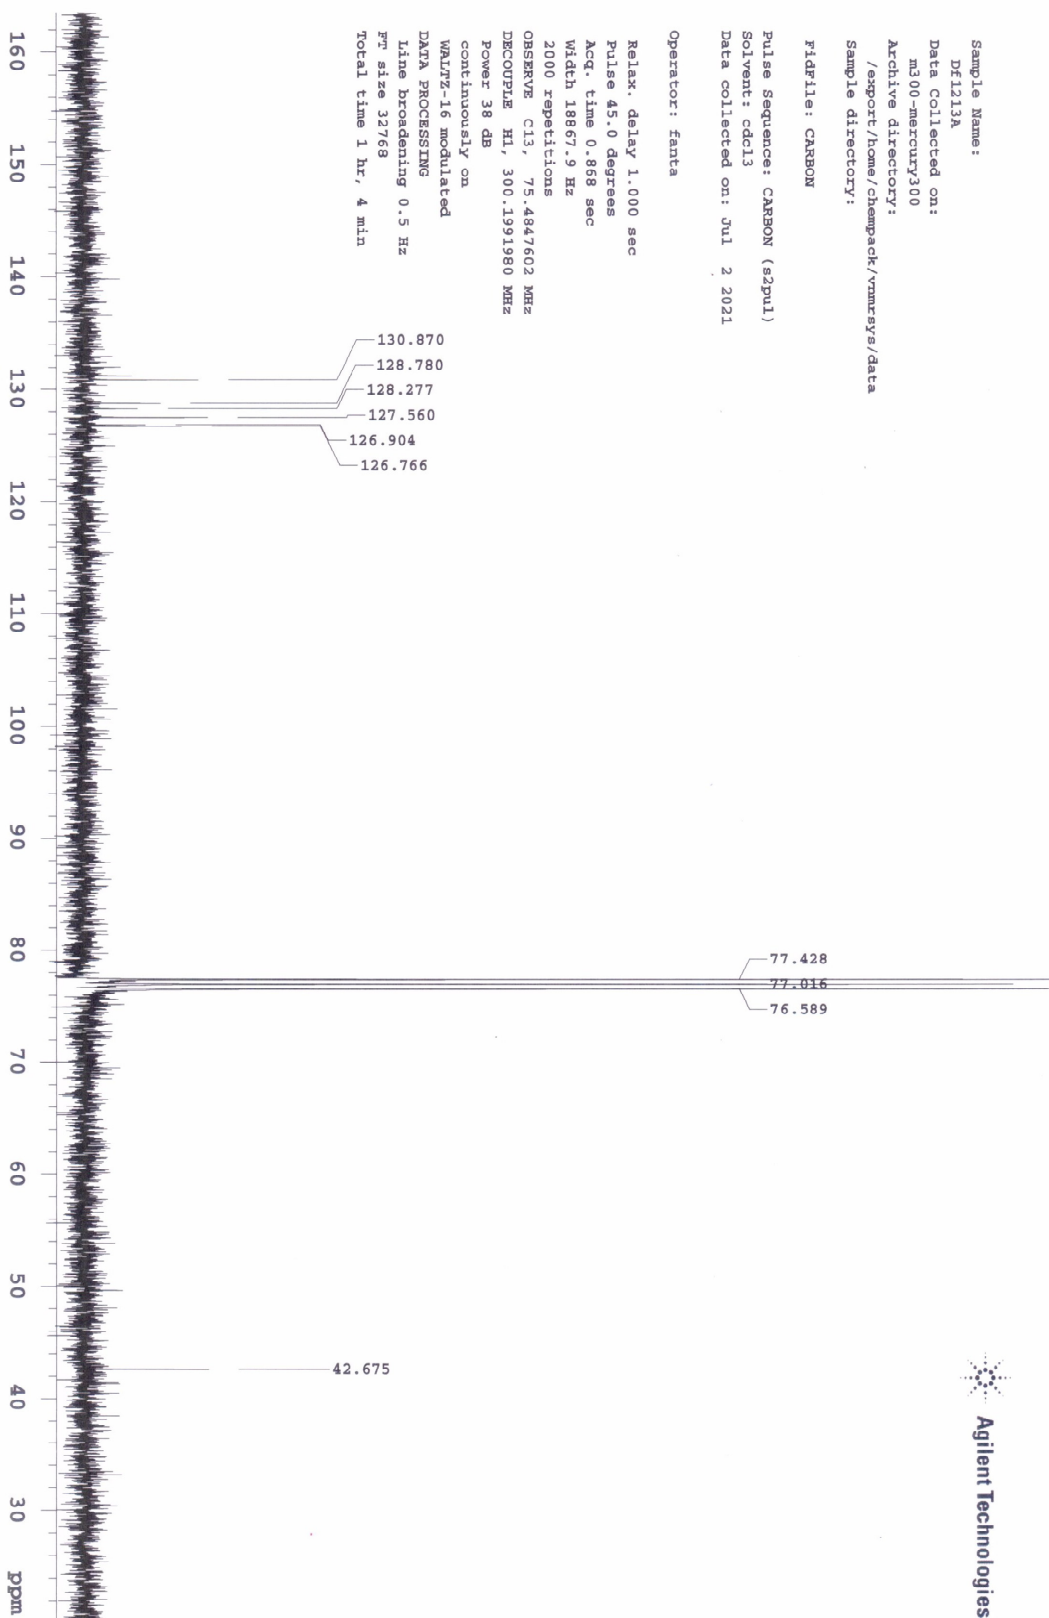



**Figure S20:**  $^1\text{H}$  NMR and  $^{13}\text{C}$  spectrum (300 MHz,  $\text{CDCl}_3$ ) of *N*-{4-[(*E*)-2-phenylvinyl]phenyl}ethanesulfonamide **2i**

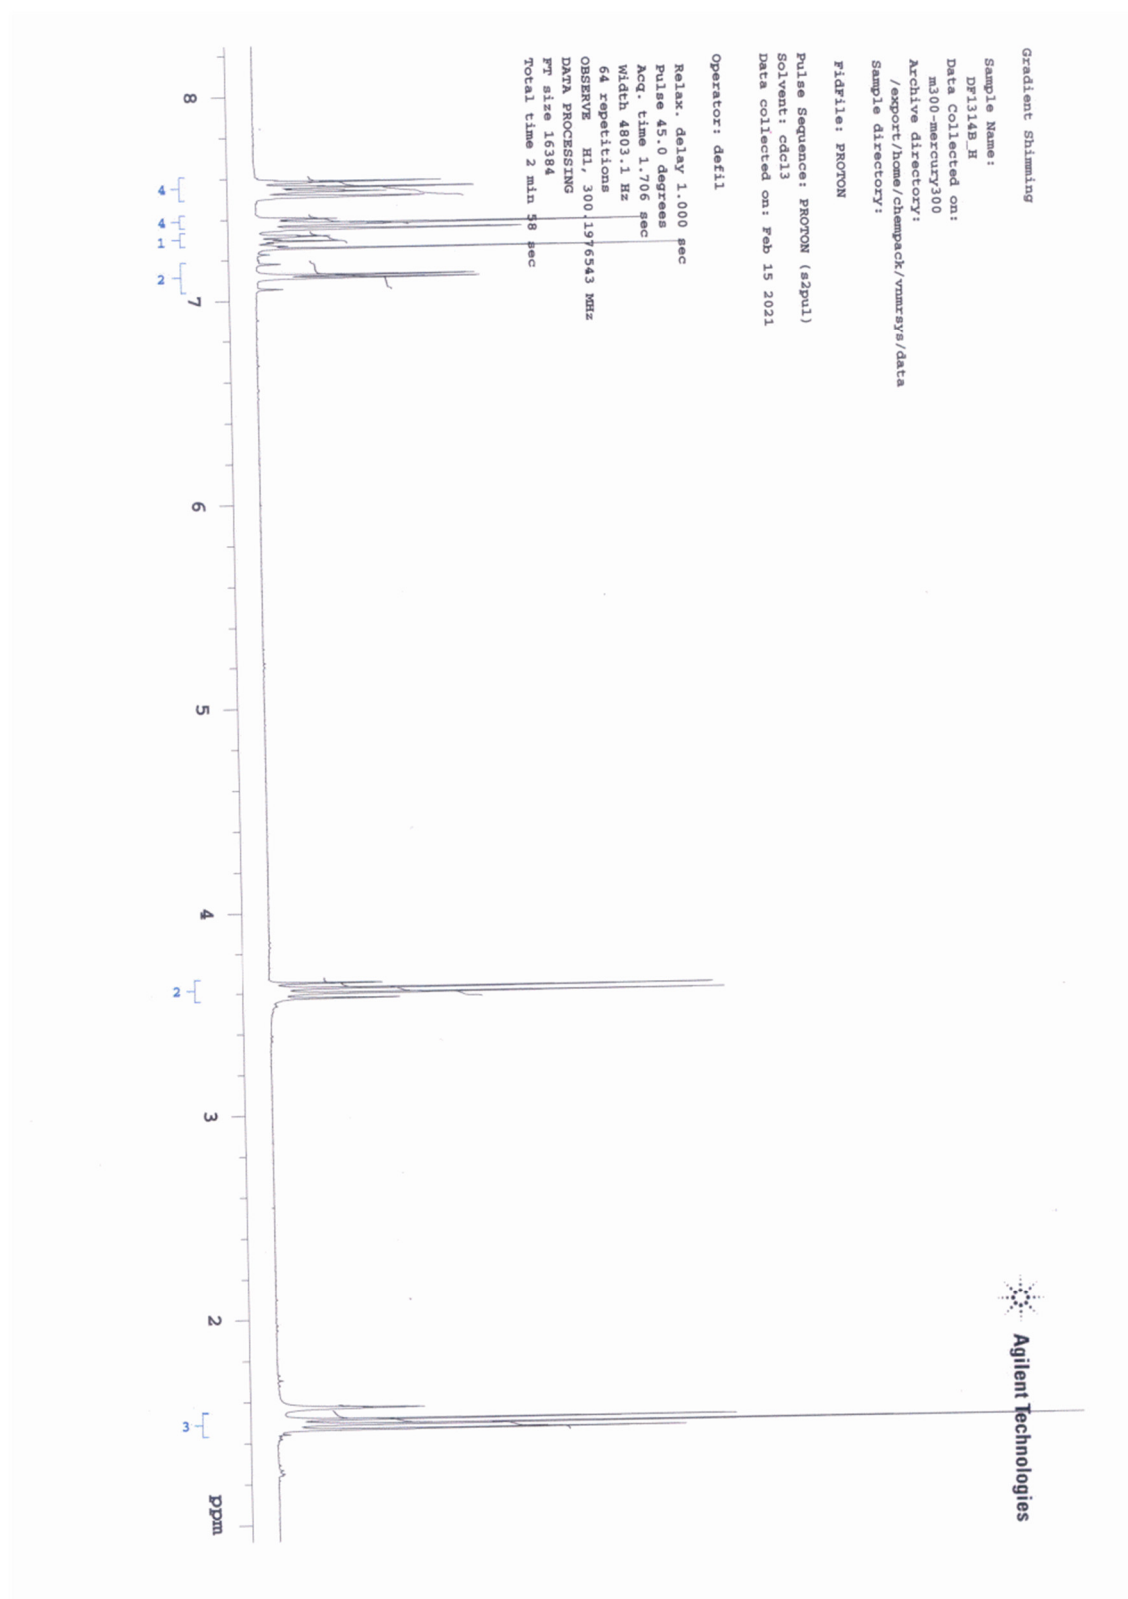



Gradient Shimming

Sample Name:

DF1314B\_C

Data Collected on:

m300-mercury300

Archive directory:

/export/home/chempack/vnmr/sys/data

Sample directory:

Fidfile: CARBON

Pulse Sequence: CARBON (s2pul)

Solvent: cdcl3

Data collected on: Feb 15, 2021

Operator: defil

Relax. delay 1.000 sec

Pulse 45.0 degrees

Acq. time 0.868 sec

Width 18867.9 Hz

2048 repetitions

OBSERVE C13, 75.4847602 MHz

DECOUPLE H1, 300.1991980 MHz

Power 38 dB

continuously on

WALTZ-16 modulated

DATA PROCESSING

Line broadening 0.5 Hz

FT size 32768

Total time 1 hr, 14 min

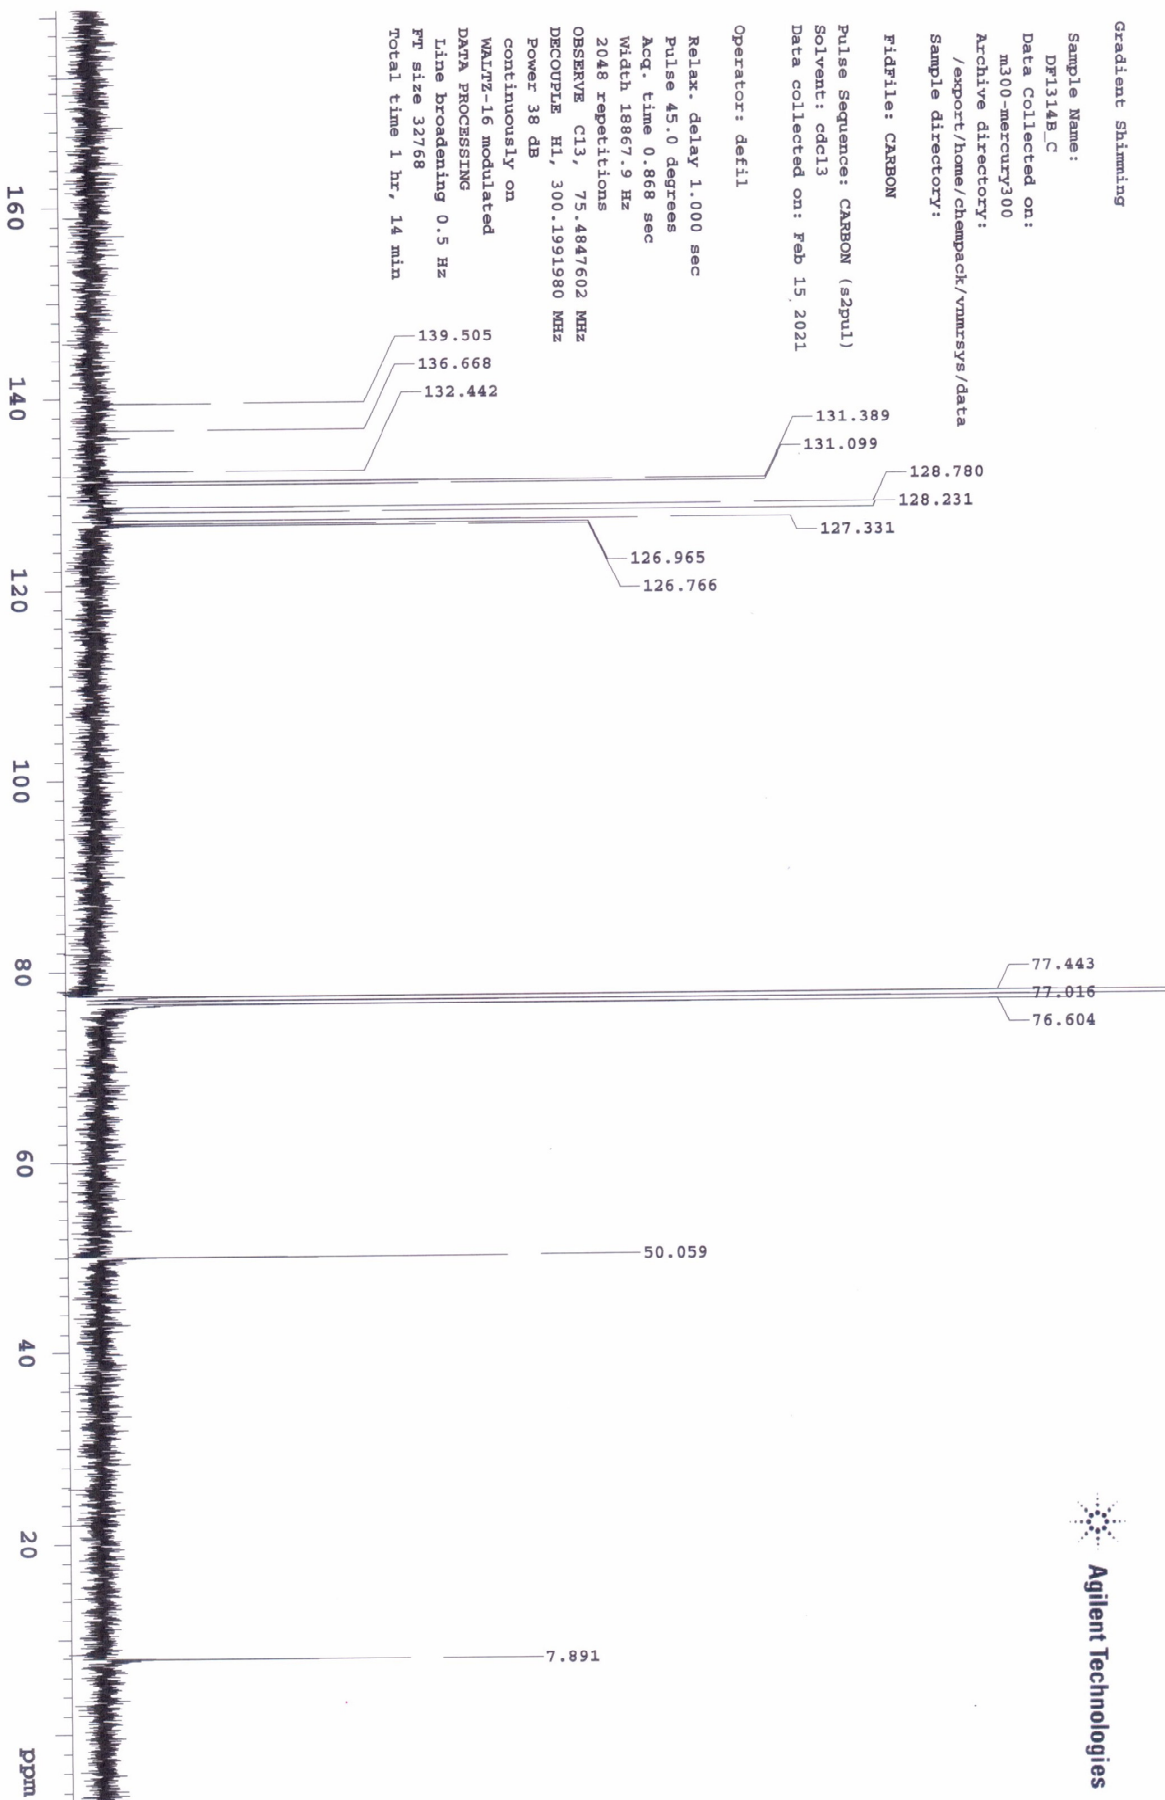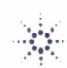

Agilent Technologies

**Figure S21:**  $^1\text{H}$  NMR and  $^{13}\text{C}$  spectrum (300 MHz,  $\text{CDCl}_3$ ) of *l*-phenyl-*N*-{4-[(*E*)-2-phenylvinyl]phenyl}methanesulfonamide-**2j**

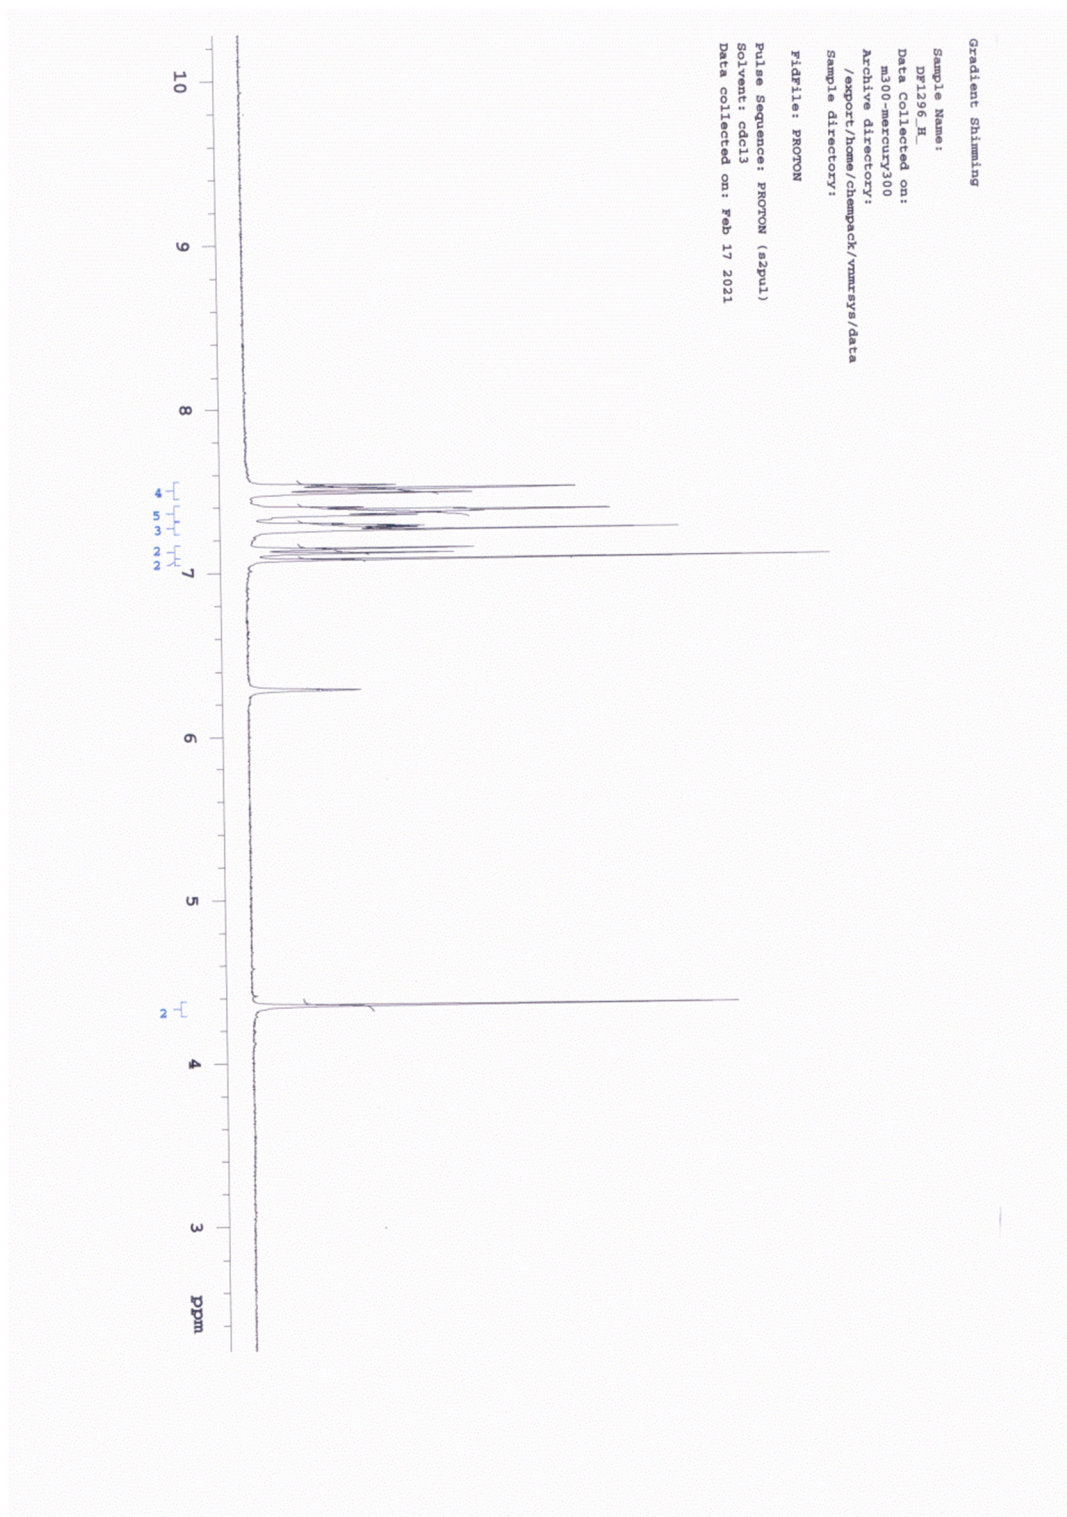

Gradient Shimming

Sample Name:

DF1296

Data Collected on:

m300-mercury300

Archive directory:

/export/home/chempack/vnmr/sys/data

Sample directory:

Fidfile: CARBON

Pulse Sequence: CARBON (s2pul)

Solvent: cdcl3

Data collected on: Feb 17 2021

Operator: defil

Relax. delay 1.000 sec

Pulse 45.0 degrees

Acq. time 0.858 sec

Width 18867.9 Hz

1894 repetitions

OBSERVE C13, 75.4847602 MHz

DECOUPLE H1, 300.1991980 MHz

Power 38 dB

continuously on

WALTZ-16 modulated

DATA PROCESSING

Line broadening 0.5 Hz

FT size 32768

Total time 1 hr, 20 min

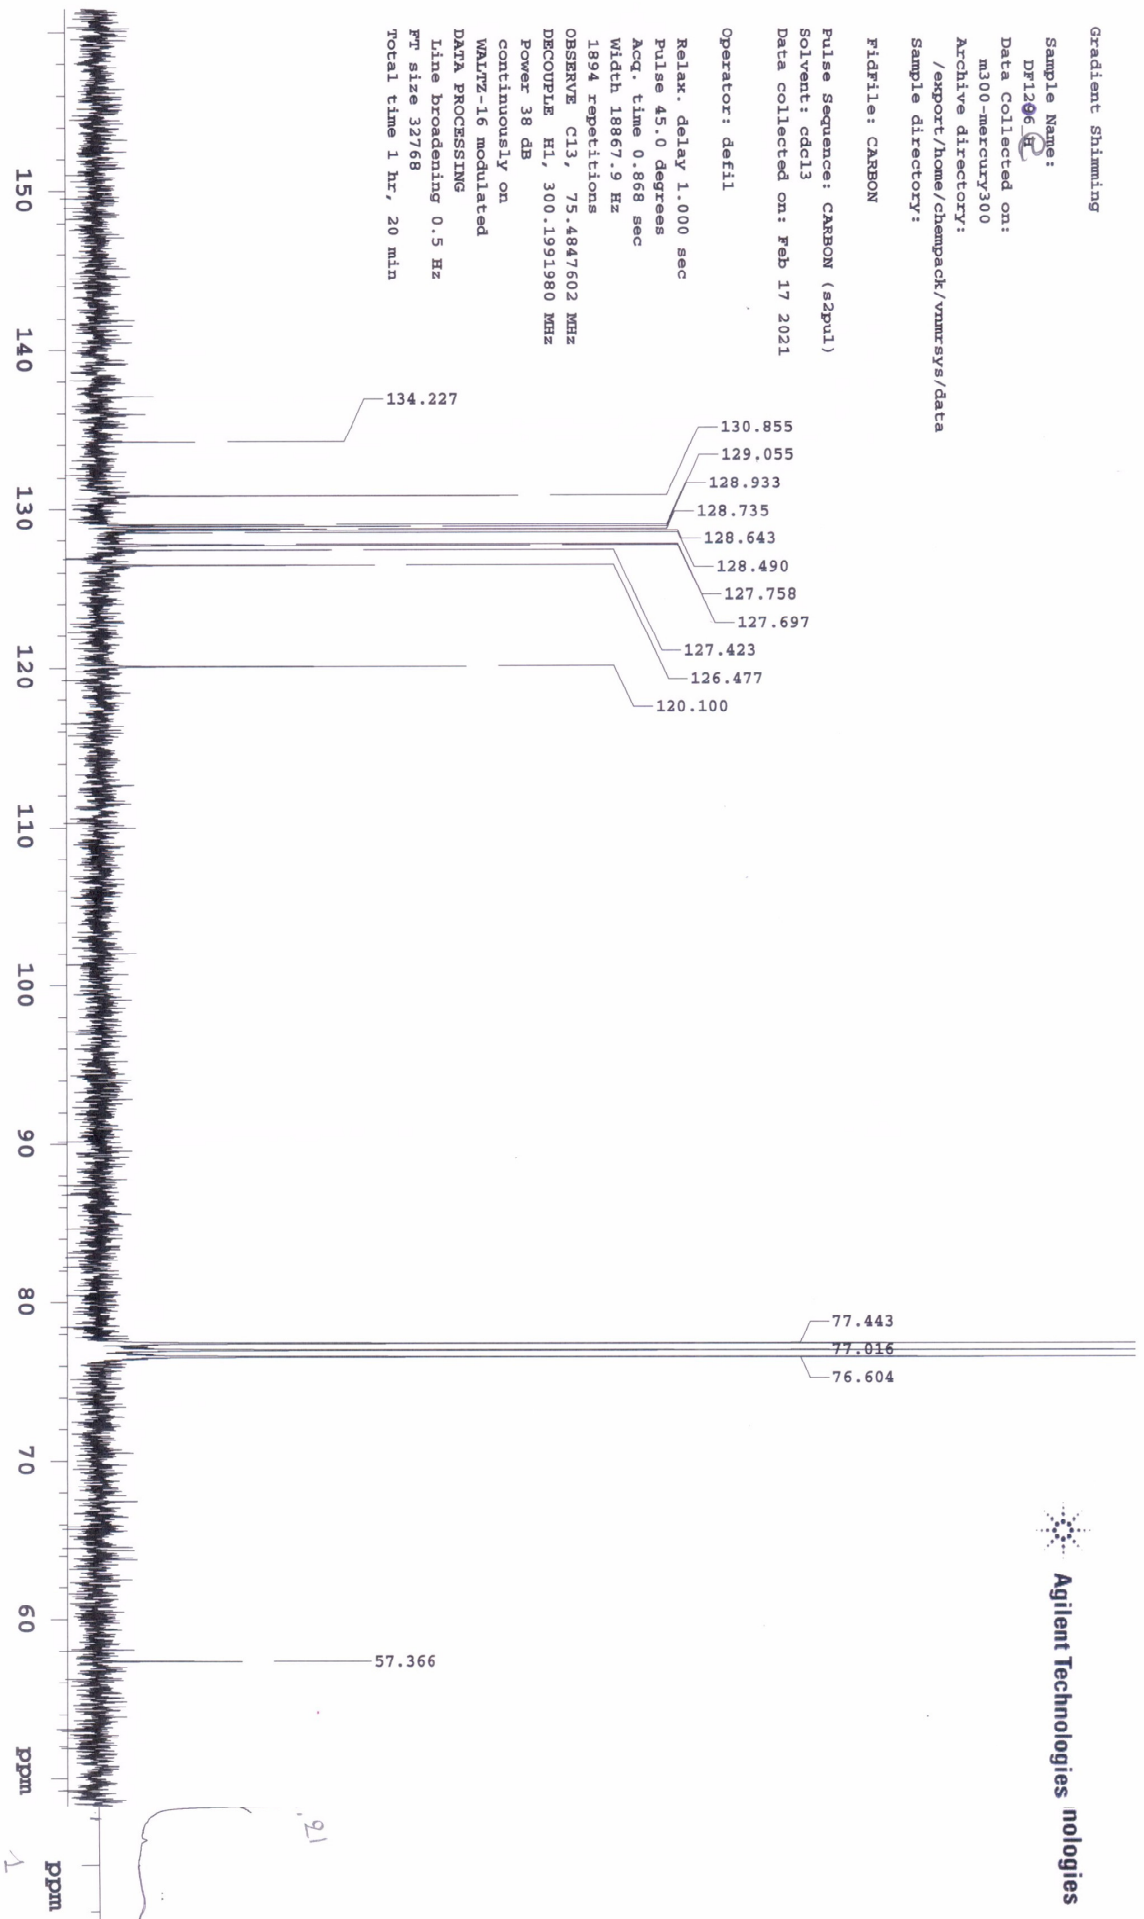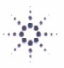

Agilent Technologies



*phenylvinyl[phenyl}thiophene-2-sulfonamide 2k*

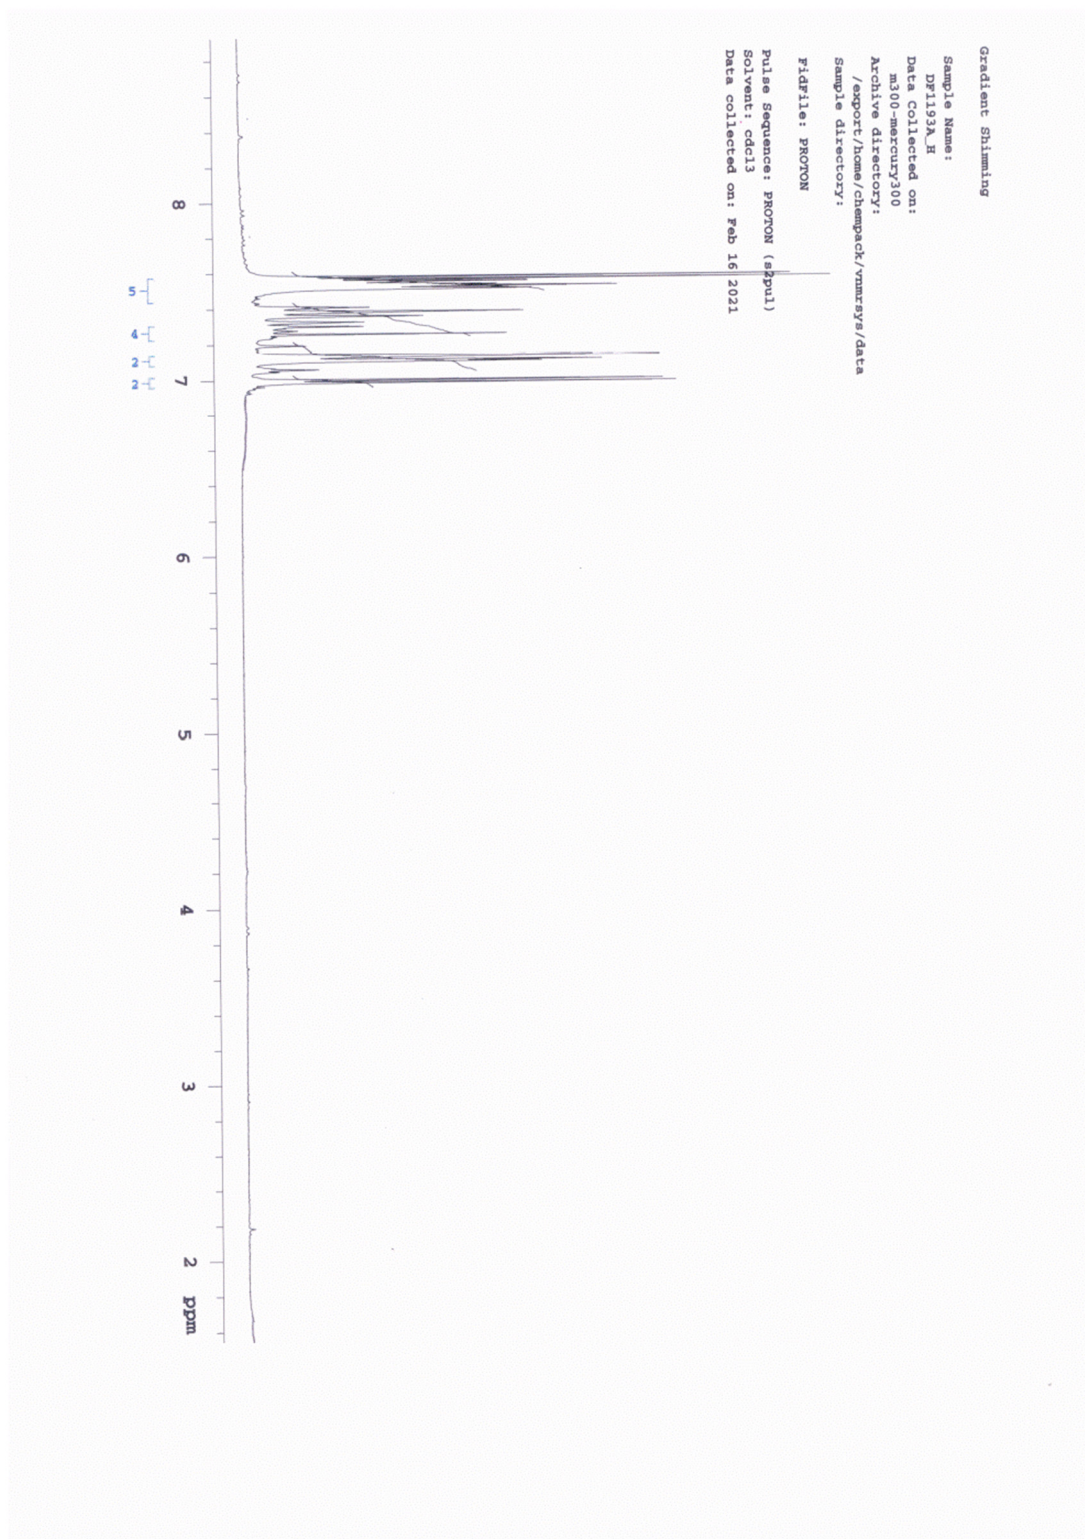



Gradient Shimming

Sample Name:

DF1193A\_H

Data Collected on:

m300-mercury300

Archive directory:

/export/home/chempack/vnmr/sys/data

Sample directory:

Filefile: CARBON

Pulse Sequence: CARBON (42ph1)

Solvent: cdcl3

Data collected on: Feb 16 2021

Operator: defil

Relax. delay 1.000 sec

Pulse 45.0 degrees

Acq. time 0.868 sec

Width 18867.9 Hz

1408 repetitions

OBSERVE C13, 75.4847603 MHz

DECOUPLE H1, 80.1191980 MHz

Power 38 dB

continuously gated

WALTZ-16 modulated

DATA PROCESSING

Line broadening 0.5 Hz

FT size 32768

Total time 58 min

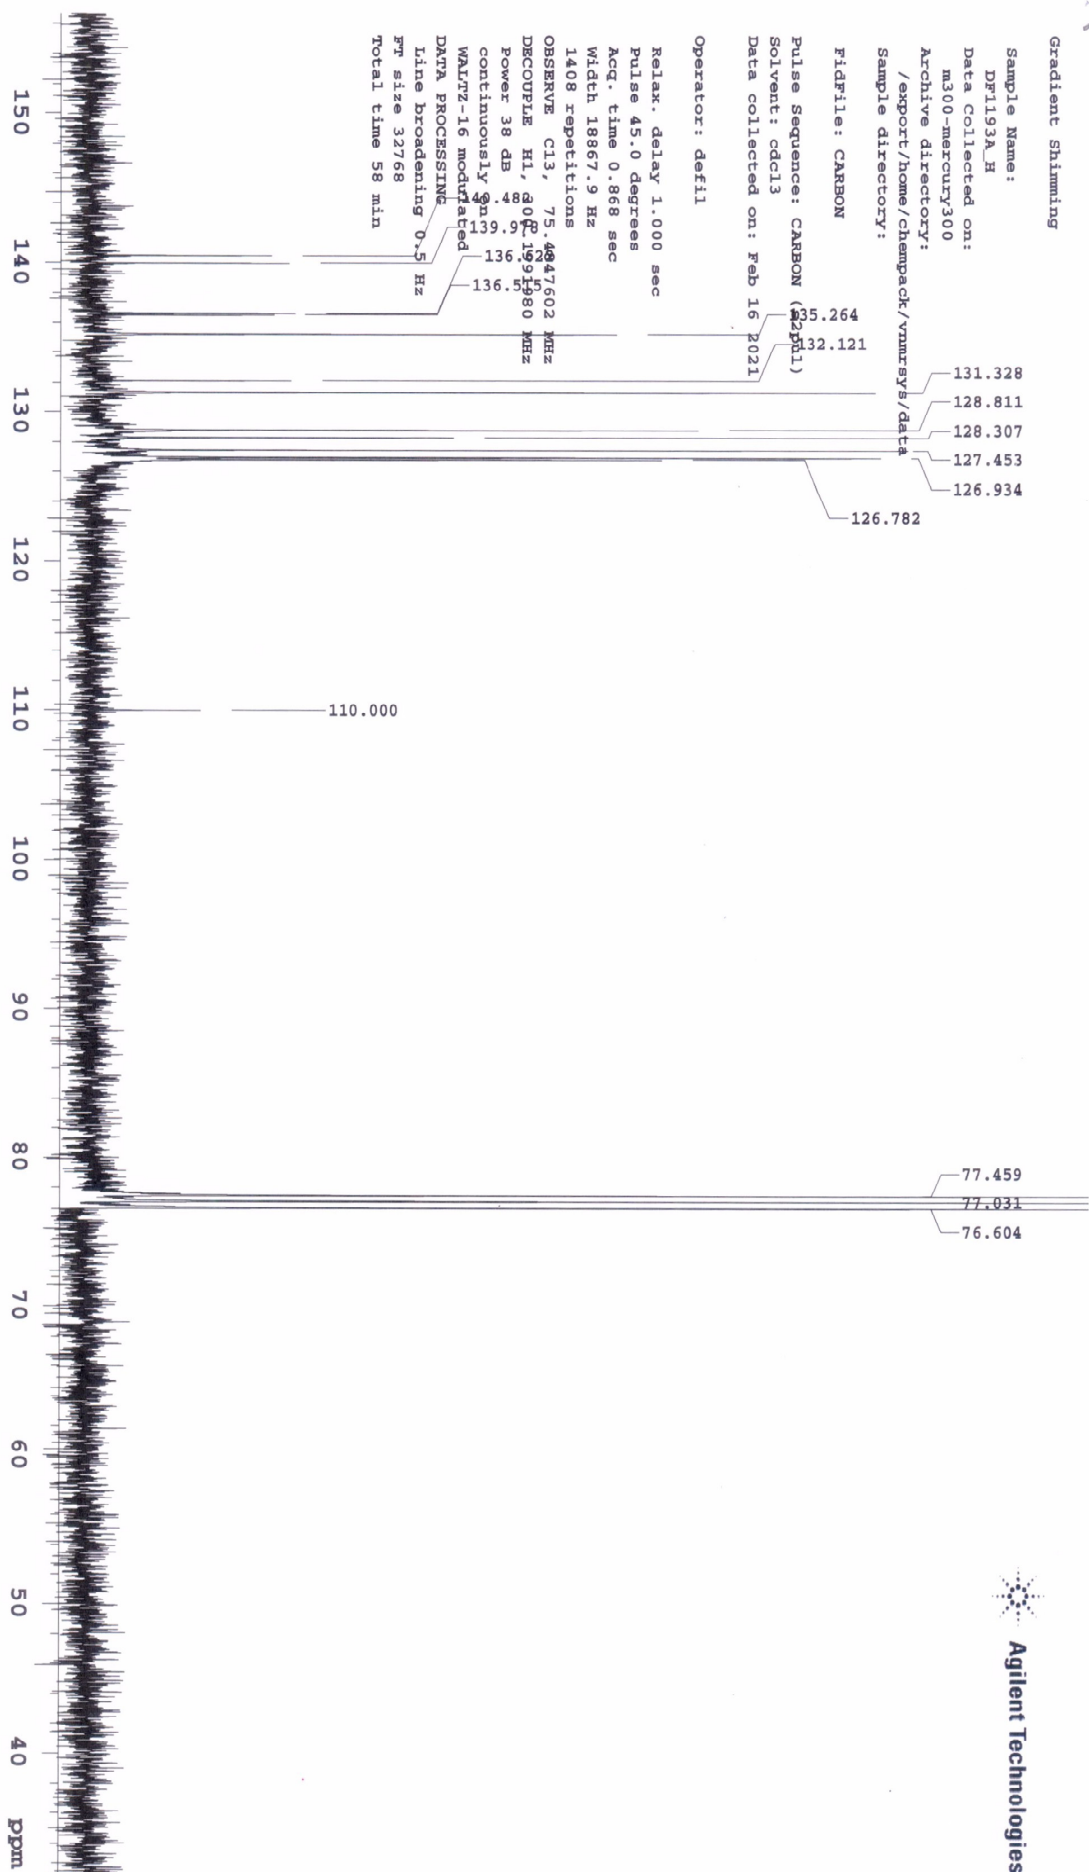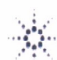

Agilent Technologies

**Table S1.** Raw data for the IC<sub>50</sub> calculation related to MCF7 cells in the presence of increasing concentrations of compounds **1b**, **1c**, **1j** and Resveratrol for 24 and 72 h.

| Compound 1b (μM) | Viability (% of control) - 24 h | Viability (% of control) - 72 h |
|------------------|---------------------------------|---------------------------------|
| 10               | 69.32 ± 14.99                   | 98.33 ± 5.24                    |
| 25               | 79.12 ± 9.66                    | 99.99 ± 9.30                    |
| 50               | 80.69 ± 4.08                    | 93.39 ± 5.39                    |
| 100              | 73.93 ± 1.87                    | 77.31 ± 7.02                    |
| 250              | 45.57 ± 3.42                    | 57.01 ± 1.01                    |
| 500              | 35.83 ± 2.22                    | 36.11 ± 0.35                    |

| Compound 1c (μM) | Viability (% of control) - 24 h | Viability (% of control) - 72 h |
|------------------|---------------------------------|---------------------------------|
| 10               | 85.23 ± 1.29                    | 96.62 ± 6.99                    |
| 25               | 73.08 ± 2.67                    | 91.88 ± 5.31                    |
| 50               | 37.39 ± 0.66                    | 46.19 ± 1.67                    |
| 100              | 36.17 ± 1.56                    | 35.22 ± 2.21                    |
| 250              | 38.64 ± 1.23                    | 38.30 ± 4.07                    |
| 500              | 34.30 ± 1.43                    | 15.08 ± 0.67                    |

| Compound 1j (μM) | Viability (% of control) - 24 h | Viability (% of control) - 72 h |
|------------------|---------------------------------|---------------------------------|
| 10               | 85.47 ± 6.41                    | 96.53 ± 7.12                    |
| 25               | 86.33 ± 14.64                   | 95.30 ± 7.88                    |
| 50               | 70.06 ± 3.80                    | 87.57 ± 5.26                    |
| 100              | 74.91 ± 9.24                    | 72.67 ± 3.46                    |
| 250              | 51.84 ± 3.08                    | 69.54 ± 4.11                    |
| 500              | 38.88 ± 5.23                    | 46.31 ± 4.73                    |

| Resveratrol (μM) | Viability (% of control) - 24 h | Viability (% of control) - 72 h |
|------------------|---------------------------------|---------------------------------|
| 10               | 80.27 ± 3.18                    | 91.92 ± 5.44                    |
| 25               | 84.94 ± 6.59                    | 73.93 ± 9.52                    |
| 50               | 87.44 ± 1.93                    | 66.54 ± 5.77                    |
| 100              | 78.29 ± 4.03                    | 47.75 ± 2.67                    |
| 250              | 60.29 ± 0.93                    | 38.05 ± 8.70                    |
| 500              | 34.30 ± 5.01                    | 15.33 ± 4.88                    |

**Figure S23:** Chromatograms of the active compounds **1b-c** and **1j** in neutral conditions:

Capillary column: 100  $\mu\text{m}$  x 15 cm packed with Chromspher C18 dp 3  $\mu\text{m}$ ; mobile phase, ACN/H<sub>2</sub>O (75 /15 % (v/v) containing a 10 mM sodium hydrocarbonate buffer, pH 8.5; UV detection, 206 nm; the studied compounds at a final concentration of 100  $\mu\text{g/mL}$  were dissolved with a solution of 10 mM phosphate buffer (pH 7.4); injection time 15 s; flow rate, 450 nL/min.

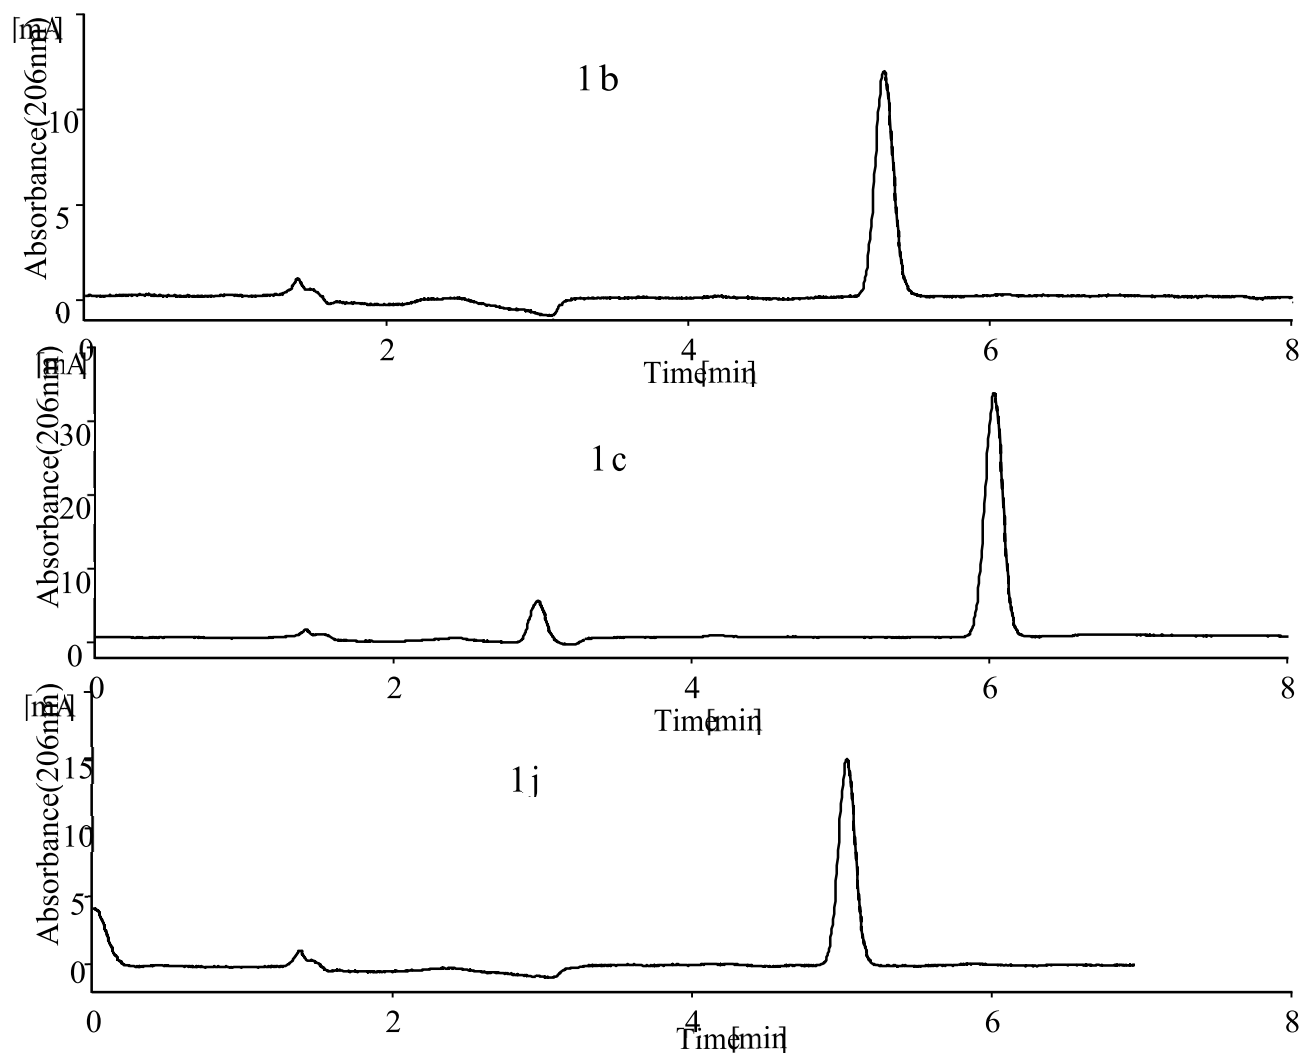

Supplement: s1 [file s1]
